# Supplementary material for: Phosphine catalyzed [3+2] cyclization/Michael addition of allenoate with CS2 to form 2-thineyl vinyl sulfide
Source: Royal Society of Chemistry journal article supplement (doi:10.1039/d0cc05070a), 2020-01-01

## Phosphine catalyzed [3+2] cyclization/Michael addition of allenoate with CS<sub>2</sub> to form 2-thieryl vinyl sulfide

Weihong Fei<sup>a†</sup>, Ping Xu<sup>a†</sup>, Jie Hou<sup>a</sup> and Weijun Yao<sup>\*a</sup>

<sup>a</sup> Department of Chemistry, Zhejiang Sci-Tech University, Hangzhou, 310018, P.R. China.

<sup>†</sup> The authors contribute equally to this work.

Email: Orgywj@zstu.edu.cn;

### Table of contents

|                                                                       |     |
|-----------------------------------------------------------------------|-----|
| A. General information                                                | S2  |
| B. Preparation and analytical data of allenoate <b>1</b> and <b>3</b> | S2  |
| C. General procedure for the DPPE catalyzed tandem reaction           | S5  |
| D. Analytical data of products <b>2</b> and <b>4</b>                  | S5  |
| E. Gram scale synthesis of <b>21</b>                                  | S12 |
| F. Reaction of <b>21</b> with benzyne                                 | S12 |
| G. Transformation of <b>21</b>                                        | S13 |
| H. Control experiment with Maleimide                                  | S15 |
| I. X-Ray crystallographic analysis of <b>4a</b>                       | S15 |
| J. References                                                         | S16 |
| K. Spectra                                                            | S17 |

## A. General information

Unless otherwise specified, all reactions were carried out with dry solvents in anhydrous conditions. THF, toluene, dichloromethane and acetonitrile were dried by activated molecular sieve (4 Å). All chemicals were used without further purification as commercially available unless otherwise noted. Thin-layer chromatography (TLC) was performed on silica gel plates (60F-254) using UV-light (254 and 365 nm). Flash chromatography was conducted on silica gel (200–300 mesh).  $^1\text{H}$  and  $^{13}\text{C}$  NMR spectra were recorded on a Bruker AV400 MHz spectrometer. Chemical shifts were reported in parts per million (ppm). High resolution mass spectra (HRMS) were recorded on a Waters TOFMS GCT Premier using ESI ionization. Petroleum ether (PE) refers to the fraction with boiling point in the range 60 – 90 °C.

## B. Preparation and analytical data of allenolate 1 and 3

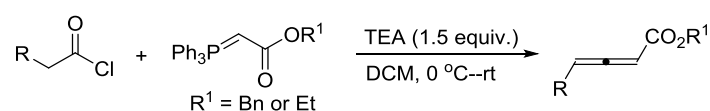

Allenolate **1** and **3** was prepared from corresponding substituted acetyl chloride with phosphonium ylide according to the reported procedure.<sup>[1, 2]</sup> The  $^1\text{H}$  NMR spectra of known compounds were consistent with the literature reported. The analytical data of new compounds (**1e**, **1h**, **1i**, **3b**, **3c**, **3f**, **3g**, **3h** and **3i**) were as follow.

### Benzyl octa-2,3-dienoate **1e**

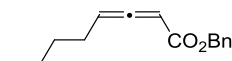

Colourless oil; it is a unseparated mixture with alkynoate, and the ratio is 2.3:1 from crude  $^1\text{H}$  NMR. The NMR details as follow:  $^1\text{H}$  NMR (400 MHz,  $\text{CDCl}_3$ )  $\delta$  7.44 – 7.29 (m, 5H), 5.66 – 5.59 (m, 1.25H, allenolate), 5.27 – 5.09 (m, 2H), 3.30 (t,  $J = 2.4$  Hz, 0.54H, alkynoate), 2.24 – 2.10 (m, 2H), 1.53 – 1.31 (m, 4H), 0.95 – 0.84 (m, 3H) ppm;  $^{13}\text{C}$  NMR (101 MHz,  $\text{CDCl}_3$ ) for allenolate:  $\delta$  212.6, 166.1, 136.0, 128.5, 128.2, 95.5, 88.0, 66.4, 30.8, 27.1, 22.0, 13.8 ppm; for alkynoate:  $\delta$  168.8, 135.5, 128.5, 128.33, 128.1, 128.1, 84.0, 71.2, 67.0, 30.7, 26.1, 21.9, 18.4, 13.6 ppm; IR (film)  $\nu = 2958, 2932, 2026, 1960, 1722, 1631\text{ cm}^{-1}$ ; HRMS (ESI)  $m/z$  calcd for  $\text{C}_{15}\text{H}_{19}\text{O}_2$   $[\text{M}+\text{H}]^+ = 231.1380$ , found = 231.1395.

### Benzyl deca-2,3-dienoate **1h**

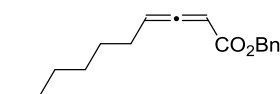

Pale yellow oil;  $^1\text{H}$  NMR (400 MHz,  $\text{CDCl}_3$ )  $\delta$  7.40 – 7.30 (m, 5H), 5.66 – 5.61 (m, 2H), 5.22 (d,  $J$  = 12.5 Hz, 1H), 5.18 (d,  $J$  = 12.5 Hz, 1H), 2.19 – 2.11 (m, 2H), 1.52 – 1.42 (m, 2H), 1.39 – 1.25 (m, 6H), 0.90 (t,  $J$  = 6.8 Hz, 3H) ppm;  $^{13}\text{C}$  NMR (101 MHz,  $\text{CDCl}_3$ )  $\delta$  212.6, 166.0, 136.0, 128.4, 128.0, 127.9, 95.5, 87.9, 66.3, 31.4, 28.6, 28.5, 27.4, 22.5, 14.0 ppm; IR (film)  $\nu$  = 2959, 2929, 2026, 1960, 1720, 1631  $\text{cm}^{-1}$ ; HRMS (ESI)  $m/z$  calcd for  $\text{C}_{17}\text{H}_{23}\text{O}_2$   $[\text{M}+\text{H}]^+$  = 259.1693, found = 259.1704.

**Benzyl 4-cyclopentylbuta-2,3-dienoate 1i**

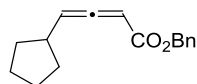

Pale yellow oil;  $^1\text{H}$  NMR (400 MHz,  $\text{CDCl}_3$ )  $\delta$  7.42 – 7.29 (m, 5H), 5.71 – 5.63 (m, 2H), 5.22 (d,  $J$  = 12.5 Hz, 1H), 5.14 (d,  $J$  = 12.5 Hz, 1H), 2.68 – 2.55 (m, 1H), 1.88– 1.80 (m, 2H), 1.70 – 1.53 (m, 4H), 1.49 – 1.37 (m, 2H) ppm;  $^{13}\text{C}$  NMR (101 MHz,  $\text{CDCl}_3$ )  $\delta$  211.9, 166.0, 136.1, 128.4, 128.0, 128.0, 100.3, 88.6, 66.3, 38.1, 32.7, 32.4, 24.7 ppm; IR (film)  $\nu$  = 2955, 2869, 2026, 1958, 1720, 1631  $\text{cm}^{-1}$ ; HRMS (ESI)  $m/z$  calcd for  $\text{C}_{16}\text{H}_{19}\text{O}_2$   $[\text{M}+\text{H}]^+$  = 243.1380, found = 243.1396.

**Ethyl 4-(p-tolyl)buta-2,3-dienoate 3b**

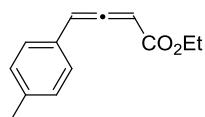

yellow oil;  $^1\text{H}$  NMR (400 MHz,  $\text{CDCl}_3$ )  $\delta$  7.21 (d,  $J$  = 8.1 Hz, 2H), 7.15 (d,  $J$  = 8.1 Hz, 2H), 6.61 (d,  $J$  = 6.4 Hz, 1H), 6.02 (d,  $J$  = 6.4 Hz, 1H), 4.23 (q,  $J$  = 7.2 Hz, 2H), 2.35 (s, 3H), 1.29 (t,  $J$  = 7.1 Hz, 3H) ppm;  $^{13}\text{C}$  NMR (101 MHz,  $\text{CDCl}_3$ )  $\delta$  214.6, 165.17, 137.9, 129.5, 128.0, 127.3, 98.4, 91.7, 61.0, 21.2, 14.1 ppm; IR (film)  $\nu$  = 2980, 2924, 2026, 1729, 1631, 1590  $\text{cm}^{-1}$ ; HRMS (ESI)  $m/z$  calcd for  $\text{C}_{13}\text{H}_{15}\text{O}_2$   $[\text{M}+\text{H}]^+$  = 203.1067, found = 203.1081;

**Ethyl 4-(4-(tert-butyl)phenyl)buta-2,3-dienoate 3c**

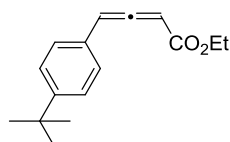

Pale yellow oil;  $^1\text{H}$  NMR (400 MHz,  $\text{CDCl}_3$ )  $\delta$  7.38 (d,  $J$  = 8.4 Hz, 2H), 7.26 (d,  $J$  = 8.4 Hz, 2H), 6.62 (d,  $J$  = 6.4 Hz, 1H), 6.02 (d,  $J$  = 6.3 Hz, 1H), 4.23 (qd,  $J$  = 7.1, 2.2 Hz, 2H), 1.33 (s, 9H), 1.30 (t,  $J$  = 7.1 Hz, 3H) ppm;  $^{13}\text{C}$  NMR (101 MHz,  $\text{CDCl}_3$ )  $\delta$  214.7, 165.1, 151.3, 128.1, 127.2, 125.8, 98.3, 91.7, 61.0, 34.6, 31.2, 14.2 ppm; IR (film)  $\nu$  = 2963, 2026, 1733, 1632, 1592, 1386  $\text{cm}^{-1}$ ; HRMS (ESI)  $m/z$  calcd for  $\text{C}_{16}\text{H}_{21}\text{O}_2$   $[\text{M}+\text{H}]^+$  = 245.1536, found = 245.1548.

**Ethyl 4-(naphthalen-2-yl)buta-2,3-dienoate 3f**

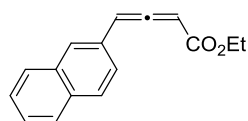

Pale yellow gel; it is a unseparated mixture with alkynoate, and the ratio is 9:1 from crude  $^1\text{H}$  NMR.  $^1\text{H}$  NMR (400 MHz,  $\text{CDCl}_3$ )  $\delta$  7.80 (d,  $J$  = 8.1 Hz, 3H), 7.72 (s, 1H), 7.47 (dd,  $J$  = 11.1, 7.0 Hz, 3H), 6.80 (d,  $J$  = 6.2 Hz, 1H), 6.11 (d,  $J$  = 6.2 Hz, 1H), 4.27 (q,  $J$  = 7.0 Hz, 2H), 1.31 (t,  $J$  = 7.1 Hz, 3H) ppm;

$^{13}\text{C}$  NMR (101 MHz,  $\text{CDCl}_3$ )  $\delta$  215.1, 165.0, 133.5, 133.0, 131.6, 128.5, 127.8, 127.7, 126.8, 126.4, 126.2, 124.8, 99.0, 92.1, 61.1, 14.2 ppm; IR (KBr)  $\nu$  = 2980, 2026, 1718, 1632, 1596, 1351  $\text{cm}^{-1}$ ; HRMS (ESI)  $m/z$  calcd for  $\text{C}_{16}\text{H}_{15}\text{O}_2$   $[\text{M}+\text{H}]^+$  = 239.1067, found = 239.1080.

Ethyl 4-([1,1'-biphenyl]-4-yl)buta-2,3-dienoate **3g**

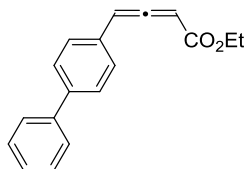

White solid, m.p. 59.8-62.1  $^\circ\text{C}$ ;  $^1\text{H}$  NMR (400 MHz,  $\text{CDCl}_3$ )  $\delta$  7.62 – 7.56 (m, 4H), 7.45 (t,  $J$  = 7.5 Hz, 2H), 7.40-7.34 (m, 3H), 6.68 (d,  $J$  = 6.4 Hz, 1H), 6.06 (d,  $J$  = 6.3 Hz, 1H), 4.25 (qd,  $J$  = 7.1, 1.6 Hz, 2H), 1.31 (t,  $J$  = 7.1 Hz, 3H) ppm;  $^{13}\text{C}$  NMR (101 MHz,  $\text{CDCl}_3$ )  $\delta$  214.9, 165.0, 140.9, 140.4, 130.1, 128.8, 127.9, 127.5, 127.5, 126.9, 98.3, 92.0, 61.2, 14.2 ppm; IR (KBr)  $\nu$  = 3031, 2978, 2026, 1943, 1714, 1632  $\text{cm}^{-1}$ ; HRMS (ESI)  $m/z$  calcd for  $\text{C}_{18}\text{H}_{17}\text{O}_2$   $[\text{M}+\text{H}]^+$  = 265.1223 found = 265.1236.

Ethyl 4-(benzo[d][1,3]dioxol-5-yl)buta-2,3-dienoate **3h**

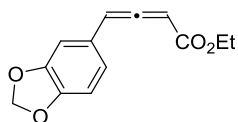

Pale yellow oil; it is a mixture containing 14% unseparated alkynoate from  $^1\text{H}$ NMR.  $^1\text{H}$  NMR (400 MHz,  $\text{CDCl}_3$ )  $\delta$  6.78 (s, 1H), 6.75 (s, 2H), 6.54 (d,  $J$  = 6.3 Hz, 1H), 5.98 (d,  $J$  = 6.3 Hz, 1H), 5.94 (s, 2H), 4.20 (qd,  $J$  = 7.1, 1.1 Hz, 2H), 1.27 (t,  $J$  = 7.1 Hz, 3H) ppm;  $^{13}\text{C}$  NMR (101 MHz,  $\text{CDCl}_3$ )  $\delta$  214.4, 165.0, 148.2, 147.7, 124.8, 121.6, 108.5, 107.2, 101.2, 98.6, 92.1, 61.1, 14.2 ppm; IR (film)  $\nu$  = 2980, 2903, 2026, 1718, 1632, 1603  $\text{cm}^{-1}$ ; HRMS (ESI)  $m/z$  calcd for  $\text{C}_{13}\text{H}_{13}\text{O}_4$   $[\text{M}+\text{H}]^+$  = 233.0808, found = 233.0822.

Ethyl 4-(2,3-dihydrobenzofuran-5-yl)buta-2,3-dienoate **3i**

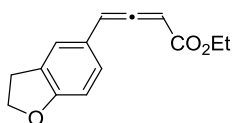

pale yellow oil;  $^1\text{H}$  NMR (400 MHz,  $\text{CDCl}_3$ )  $\delta$  7.16 (s, 1H), 7.04 (d,  $J$  = 8.2 Hz, 1H), 6.75 (d,  $J$  = 8.2 Hz, 1H), 6.58 (d,  $J$  = 6.3 Hz, 1H), 5.99 (d,  $J$  = 6.3 Hz, 1H), 4.58 (t,  $J$  = 8.7 Hz, 2H), 4.22 (qd,  $J$  = 7.1, 2.0 Hz, 2H), 3.20 (t,  $J$  = 8.7 Hz, 2H), 1.29 (t,  $J$  = 7.1 Hz, 3H) ppm;  $^{13}\text{C}$  NMR (101 MHz,  $\text{CDCl}_3$ )  $\delta$  214.6, 165.3, 160.3, 128.0, 127.7, 123.9, 122.9, 109.5, 109.2, 98.5, 91.8, 71.5, 61.0, 29.5, 14.2 ppm; IR (film)  $\nu$  = 2980, 2026, 1716, 1632, 1593, 1385  $\text{cm}^{-1}$ ; HRMS (ESI)  $m/z$  calcd for  $\text{C}_{14}\text{H}_{15}\text{O}_3$   $[\text{M}+\text{H}]^+$  = 231.1016, found = 231.1029.

### C. General procedure for the DPPE catalyzed tandem reaction

To a dried sealed tube with a magnetic stirring bar were added allenolate **1** or **3** (0.4 mmol) and CS<sub>2</sub> (2 mL), followed by the addition of DPPE (0.04 mmol, 15.9 mg) at room temperature. The resulting mixture was sealed and stirred overnight at room temperature. After the completely consumption of allenolate monitored by TLC, the mixture was purified directly by column chromatography on silica gel with PE/Ea as eluent to afford product **2** or **4**.

### D. Analytical data of products 1 or 3

Benzyl (E)-2-((5-(benzyloxy)-5-oxopent-2-en-3-yl)thio)-5-methylthiophene-3-carboxylate **2a**

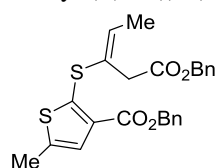

Crude <sup>1</sup>HNMR show the E/Z ratio is more than 19:1. pale yellow oil; <sup>1</sup>H NMR (400 MHz, CDCl<sub>3</sub>) δ 7.44 – 7.42 (m, 2H), 7.40 – 7.29 (m, 8H), 7.06 (s, 1H), 6.42 (q, *J* = 7.0 Hz, 1H), 5.29 (s, 2H), 5.12 (s, 2H), 3.49 (s, 2H), 2.35 (s, 3H), 1.81 (d, *J* = 7.0 Hz, 3H) ppm; <sup>13</sup>C NMR (101 MHz, CDCl<sub>3</sub>) δ 169.6, 162.5, 146.0, 140.6, 137.6, 136.1, 135.6, 128.5, 128.2, 128.1, 128.0, 127.4, 126.2, 66.7, 66.2, 37.6, 15.5, 15.2 ppm; IR (film) ν = 3033, 2917, 1736, 1701, 1455, 1232 cm<sup>-1</sup>; HRMS (ESI) *m/z* calcd for C<sub>25</sub>H<sub>25</sub>O<sub>4</sub>S<sub>2</sub>[M+H]<sup>+</sup> = 453.1189, found = 453.1193.

Benzyl (E)-2-((1-(benzyloxy)-1-oxohex-3-en-3-yl)thio)-5-ethylthiophene-3-carboxylate **2b**

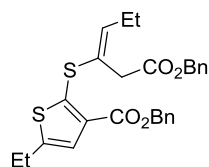

Crude <sup>1</sup>HNMR show the E/Z ratio is more than 19:1. pale yellow oil; <sup>1</sup>H NMR (400 MHz, CDCl<sub>3</sub>) δ 7.44 (d, *J* = 7.0 Hz, 2H), 7.39 – 7.31 (m, 8H), 7.09 (s, 1H), 6.34 (t, *J* = 7.5 Hz, 1H), 5.29 (s, 2H), 5.11 (s, 2H), 3.49 (s, 2H), 2.70 (q, *J* = 7.5 Hz, 2H), 2.19 (p, *J* = 7.5 Hz, 2H), 1.24 (t, *J* = 7.5 Hz, 3H), 1.04 (t, *J* = 7.5 Hz, 3H) ppm; <sup>13</sup>C NMR (101 MHz, CDCl<sub>3</sub>) δ 169.7, 162.7, 147.7, 145.0, 136.2, 135.7, 128.5, 128.2, 128.2, 128.1, 128.0, 127.2, 125.6, 124.7, 66.8, 66.2, 37.9, 23.3, 15.4, 13.1 ppm; IR (film) ν = 3032, 2967, 1737, 1701, 1497, 1455 cm<sup>-1</sup>; HRMS (ESI) *m/z* calcd for C<sub>27</sub>H<sub>29</sub>O<sub>4</sub>S<sub>2</sub>[M+H]<sup>+</sup> = 481.1502, found = 481.1505.

Benzyl (E)-2-((1-(benzyloxy)-1-oxohept-3-en-3-yl)thio)-5-propylthiophene-3-carboxylate **2c**

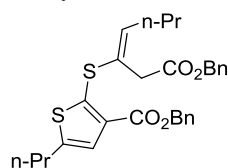

Crude <sup>1</sup>HNMR show the E/Z ratio is more than 19:1. pale yellow oil; <sup>1</sup>H NMR (400 MHz, CDCl<sub>3</sub>) δ

7.44 (d,  $J = 7.1$  Hz, 2H), 7.40 – 7.29 (m, 8H), 7.08 (s, 1H), 6.35 (t,  $J = 7.5$  Hz, 1H), 5.29 (s, 2H), 5.11 (s, 2H), 3.49 (s, 2H), 2.64 (t,  $J = 7.5$  Hz, 2H), 2.15 (q,  $J = 7.4$  Hz, 2H), 1.69 – 1.56 (m, 2H), 1.55 – 1.38 (m, 2H), 0.93 (tt,  $J = 11.9, 5.9$  Hz, 6H) ppm;  $^{13}\text{C}$  NMR (101 MHz,  $\text{CDCl}_3$ )  $\delta$  169.6, 162.6, 146.3, 146.0, 143.3, 136.1, 135.6, 128.4, 128.2, 128.1, 128.1, 128.0, 126.3, 125.2, 66.7, 66.1, 38.0, 32.0, 31.9, 24.4, 21.9, 13.7, 13.5 ppm; IR (film)  $\nu = 2959, 2930, 1736, 1702, 1455, 1250$   $\text{cm}^{-1}$ ; HRMS (ESI)  $m/z$  calcd for  $\text{C}_{29}\text{H}_{33}\text{O}_4\text{S}_2[\text{M}+\text{H}]^+ = 509.1815$ , found = 509.1822 .

Benzyl (E)-2-((1-(benzyloxy)-5-methyl-1-oxohex-3-en-3-yl)thio)-5-isopropylthiophene-3-carboxylate **2d**

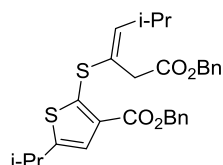

Crude  $^1\text{H}$ NMR show the E/Z ratio is 10:1 and it is an unseparated mixture. pale yellow oil;  $^1\text{H}$  NMR (400 MHz,  $\text{CDCl}_3$ )  $\delta$  7.45 (d,  $J = 7.2$  Hz, 2H), 7.40 – 7.30 (m, 8H), 7.09 (s, 1H), 6.18 (d,  $J = 10.1$  Hz, 1H), 5.30 (d,  $J = 4.7$  Hz, 2H), 5.12 (s, 2H), 3.50 (s, 2H), 3.09 – 2.95 (m, 1H), 2.64 – 2.55 (m, 1H), 1.27 (d,  $J = 6.8$  Hz, 6H), 1.04 (d,  $J = 6.6$  Hz, 6H) ppm;  $^{13}\text{C}$  NMR (101 MHz,  $\text{CDCl}_3$ )  $\delta$  169.7, 162.7, 153.3, 150.5, 146.1, 136.2, 135.6, 128.5, 128.2, 128.2, 128.1, 128.0, 124.1, 122.9, 66.8, 66.1, 38.1, 30.0, 29.6, 24.2, 22.0 ppm; IR (film)  $\nu = 3033, 2961, 1738, 1702, 1456, 1324$   $\text{cm}^{-1}$ ; HRMS (ESI)  $m/z$  calcd for  $\text{C}_{29}\text{H}_{33}\text{O}_4\text{S}_2[\text{M}+\text{H}]^+ = 509.1815$ , found = 509.1823 .

Benzyl (E)-2-((1-(benzyloxy)-1-oxooct-3-en-3-yl)thio)-4-butylcyclopenta-1,4-diene-1-carboxylate **2e**

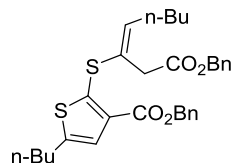

Crude  $^1\text{H}$ NMR show the E/Z ratio is more than 19:1. pale yellow oil;  $^1\text{H}$  NMR (400 MHz,  $\text{CDCl}_3$ )  $\delta$  7.44 (d,  $J = 7.1$  Hz, 2H), 7.39 – 7.30 (m, 8H), 7.07 (s, 1H), 6.35 (t,  $J = 7.5$  Hz, 1H), 5.29 (s, 2H), 5.11 (s, 2H), 3.48 (s, 2H), 2.66 (t,  $J = 7.6$  Hz, 2H), 2.17 (q,  $J = 7.3$  Hz, 2H), 1.58 (dt,  $J = 15.2, 7.6$  Hz, 2H), 1.44 – 1.28 (m, 6H), 0.91 (t,  $J = 7.2$  Hz, 3H), 0.89 (t,  $J = 7.1$  Hz, 3H) ppm;  $^{13}\text{C}$  NMR (101 MHz,  $\text{CDCl}_3$ )  $\delta$  169.7, 162.7, 146.6, 143.5, 136.2, 135.7, 128.5, 128.2, 128.2, 128.1, 128.0, 127.0, 126.2, 125.0, 66.8, 66.2, 38.0, 33.3, 30.7, 29.7, 29.7, 22.3, 22.0, 13.8, 13.7 ppm; IR (film)  $\nu = 2956, 2929, 2857, 1739, 1704, 1456$   $\text{cm}^{-1}$ ; HRMS (ESI)  $m/z$  calcd for  $\text{C}_{31}\text{H}_{37}\text{O}_4\text{S}_2[\text{M}+\text{H}]^+ = 537.2128$ , found = 537.2138.

Benzyl (E)-2-((1-(benzyloxy)-6-methyl-1-oxohept-3-en-3-yl)thio)-5-isobutylthiophene-3-carboxylate **2f**

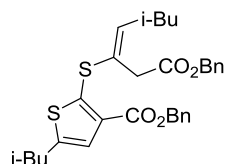

Crude  $^1\text{H}$ NMR show the E/Z ratio is more than 19:1. pale yellow oil;  $^1\text{H}$  NMR (400 MHz,  $\text{CDCl}_3$ )  $\delta$  7.45 – 7.43 (m, 2H), 7.38 – 7.31 (m, 8H), 7.08 (s, 1H), 6.38 (t,  $J = 9.3$  Hz, 1H), 5.31 (s, 2H), 5.12 (s, 2H), 3.50 (s, 2H), 2.54 (d,  $J = 3.3$  Hz, 2H), 2.08 (t,  $J = 7.0$  Hz, 2H), 1.83 – 1.71 (m, 2H), 0.97 – 0.89 (m, 12H) ppm;  $^{13}\text{C}$  NMR (101 MHz,  $\text{CDCl}_3$ )  $\delta$  169.6, 162.7, 146.3, 145.6, 142.1, 136.1, 135.6, 128.4,

128.2, 128.1, 128.0, 127.1, 127.0, 125.6, 66.7, 66.26, 39.2, 38.9, 38.0, 30.3, 28.3, 22.4, 22.1 ppm; IR (film)  $\nu = 2956, 2925, 1739, 1704, 1495, 1454 \text{ cm}^{-1}$ ; HRMS (ESI)  $m/z$  calcd for  $\text{C}_{31}\text{H}_{37}\text{O}_4\text{S}_2[\text{M}+\text{H}]^+ = 537.2128$ , found = 537.2133.

Benzyl (E)-2-((1-(benzyloxy)-5,5-dimethyl-1-oxohex-3-en-3-yl)thio)-5-(tert-butyl)thiophene-3-carboxylate **2g**

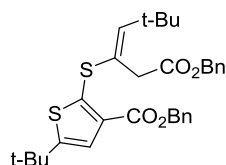

Crude  $^1\text{H}$ NMR show the E/Z ratio is more than 19:1. white powder, m.p. = 45.5 – 47.4 °C;  $^1\text{H}$  NMR (400 MHz,  $\text{CDCl}_3$ )  $\delta$  7.46 (d,  $J = 7.1$  Hz, 2H), 7.42 – 7.30 (m, 8H), 7.06 (s, 1H), 6.45 (s, 1H), 5.32 (s, 2H), 5.14 (s, 2H), 3.69 (s, 2H), 1.33 (s, 9H), 1.19 (s, 9H) ppm;  $^{13}\text{C}$  NMR (101 MHz,  $\text{CDCl}_3$ )  $\delta$  169.8, 162.8, 156.1, 154.4, 146.8, 136.2, 135.6, 128.4, 128.2, 128.1, 128.0, 126.2, 124.2, 123.5, 66.7, 66.1, 38.8, 34.8, 34.6, 32.0, 30.1, 29.6 ppm; IR (KBr)  $\nu = 3033, 2961, 1740, 1704, 1456, 1364 \text{ cm}^{-1}$ ; HRMS (ESI)  $m/z$  calcd for  $\text{C}_{31}\text{H}_{37}\text{O}_4\text{S}_2[\text{M}+\text{H}]^+ = 537.2128$ , found = 537.2136.

Benzyl (E)-2-((1-(benzyloxy)-1-oxodec-3-en-3-yl)thio)-5-hexylthiophene-3-carboxylate **2h**

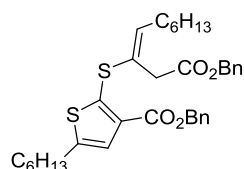

Crude  $^1\text{H}$ NMR show the E/Z ratio is more than 19:1. pale yellow oil;  $^1\text{H}$  NMR (400 MHz,  $\text{CDCl}_3$ )  $\delta$  7.44 (d,  $J = 7.1$  Hz, 2H), 7.39 – 7.30 (m, 8H), 7.07 (s, 1H), 6.36 (t,  $J = 7.5$  Hz, 1H), 5.29 (s, 2H), 5.11 (s, 2H), 3.49 (s, 2H), 2.65 (t,  $J = 7.6$  Hz, 2H), 2.17 (q,  $J = 7.3$  Hz, 2H), 1.67 – 1.53 (m, 2H), 1.47 – 1.40 (m, 2H), 1.38 – 1.19 (m, 14H), 0.98 – 0.83 (m, 6H) ppm;  $^{13}\text{C}$  NMR (101 MHz,  $\text{CDCl}_3$ )  $\delta$  169.6, 162.7, 146.8, 146.2, 143.5, 136.2, 135.6, 128.4, 128.27, 128.1, 128.1, 128.0, 127.0, 126.2, 125.0, 66.7, 66.1, 38.0, 31.6, 31.4, 31.2, 30.0, 29.9, 28.9, 28.6, 28.5, 22.6, 22.5, 14.0, 14.0 ppm; IR (film)  $\nu = 2954, 2927, 2855, 1740, 1705, 1456 \text{ cm}^{-1}$ ; HRMS (ESI)  $m/z$  calcd for  $\text{C}_{35}\text{H}_{45}\text{O}_4\text{S}_2[\text{M}+\text{H}]^+ = 593.2754$ , found = 593.2764.

Benzyl (E)-2-((4-(benzyloxy)-1-cyclopentyl-4-oxobut-1-en-2-yl)thio)-5-cyclopentylthiophene-3-carboxylate **2i**

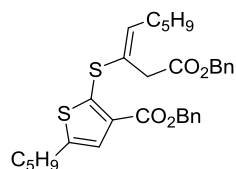

Crude  $^1\text{H}$ NMR show the E/Z ratio is more than 19:1. pale yellow oil;  $^1\text{H}$  NMR (400 MHz,  $\text{CDCl}_3$ )  $\delta$  7.45 (d,  $J = 7.2$  Hz, 2H), 7.40 – 7.29 (m, 8H), 7.10 (s, 1H), 6.29 (d,  $J = 9.8$  Hz, 1H), 5.30 (s, 2H), 5.12 (s, 2H), 3.52 (s, 2H), 3.17 – 3.02 (m, 1H), 2.69 (h,  $J = 8.1$  Hz, 1H), 2.10 – 2.02 (m, 2H), 1.89 – 1.54 (m, 12H), 1.42 – 1.32 (m, 2H) ppm;  $^{13}\text{C}$  NMR (101 MHz,  $\text{CDCl}_3$ )  $\delta$  169.8, 162.7, 151.6, 148.1, 146.2, 136.2, 135.7, 128.4, 128.1, 128.1, 128.0, 128.0, 126.7, 124.7, 123.4, 66.7, 66.1, 41.0, 40.7, 38.2, 34.9,

32.8, 25.3, 25.0 ppm; IR (film)  $\nu = 2954, 2868, 1736, 1702, 1451, 1223 \text{ cm}^{-1}$ ; HRMS (ESI)  $m/z$  calcd for  $\text{C}_{33}\text{H}_{37}\text{O}_4\text{S}_2[\text{M}+\text{H}]^+ = 561.2128$ , found = 561.2133.

Benzyl (E)-2-((4-(benzyloxy)-1-cyclohexyl-4-oxobut-1-en-2-yl)thio)-5-cyclohexylthiophene-3-carboxylate  
**2j**

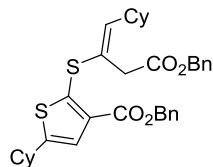

Crude  $^1\text{H}$ NMR show the E/Z ratio is more than 19:1. pale yellow oil;  $^1\text{H}$  NMR (400 MHz,  $\text{CDCl}_3$ )  $\delta$  7.44 (d,  $J = 7.0$  Hz, 2H), 7.41 – 7.29 (m, 8H), 7.08 (s, 1H), 6.19 (d,  $J = 9.9$  Hz, 1H), 5.29 (s, 2H), 5.11 (s, 2H), 3.50 (s, 2H), 2.73 – 2.56 (m, 1H), 2.32 – 2.22 (m, 1H), 2.01 – 1.92 (m, 2H), 1.84 – 1.77 (m, 2H), 1.75 – 1.63 (m, 6H), 1.37 – 1.13 (m, 10H) ppm;  $^{13}\text{C}$  NMR (101 MHz,  $\text{CDCl}_3$ )  $\delta$  169.8, 162.7, 151.8, 149.5, 145.9, 136.2, 135.6, 128.4, 128.2, 128.1, 128.0, 126.6, 124.0, 123.3, 66.7, 66.1, 39.4, 39.3, 38.2, 34.8, 31.9, 26.2, 25.7, 25.4 ppm; IR (film)  $\nu = 2925, 2850, 1738, 1702, 1448, 1245 \text{ cm}^{-1}$ ; HRMS (ESI)  $m/z$  calcd for  $\text{C}_{35}\text{H}_{41}\text{O}_4\text{S}_2[\text{M}+\text{H}]^+ = 589.2441$ , found = 589.2441.

Benzyl (E)-2-((1-(benzyloxy)-1-oxo-6-phenylhex-3-en-3-yl)thio)-5-phenethylthiophene-3-carboxylate  
**2k**

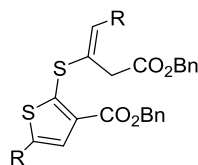

Crude  $^1\text{H}$ NMR show the E/Z ratio is more than 19:1. pale yellow oil;  $^1\text{H}$  NMR (400 MHz,  $\text{CDCl}_3$ )  $\delta$  7.43 (d,  $J = 7.0$  Hz, 2H), 7.41 – 7.27 (m, 12H), 7.24 – 7.15 (m, 6H), 7.09 (s, 1H), 6.35 (t,  $J = 7.4$  Hz, 1H), 5.29 (s, 2H), 5.11 (s, 2H), 3.41 (s, 2H), 3.00 – 2.95 (m, 2H), 2.93 – 2.87 (m, 2H), 2.74 (t,  $J = 7.6$  Hz, 2H), 2.49 (q,  $J = 7.5$  Hz, 2H) ppm;  $^{13}\text{C}$  NMR (101 MHz,  $\text{CDCl}_3$ )  $\delta$  169.5, 162.6, 145.9, 144.8, 142.3, 140.8, 140.5, 136.1, 135.6, 128.4, 128.4, 128.2, 128.1, 128.1, 127.3, 126.6, 126.38, 126.1, 125.9, 66.8, 66.2, 38.0, 37.4, 34.6, 31.8, 31.6 ppm; IR (film)  $\nu = 3027, 2921, 1735, 1701, 1496, 1453 \text{ cm}^{-1}$ ; HRMS (ESI)  $m/z$  calcd for  $\text{C}_{39}\text{H}_{37}\text{O}_4\text{S}_2[\text{M}+\text{H}]^+ = 633.2128$ , found = 633.2139

Ethyl 2-((4-ethoxy-4-oxobut-1-en-2-yl)thio)thiophene-3-carboxylate **2l**

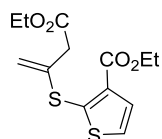

Pale yellow oil;  $^1\text{H}$  NMR (400 MHz,  $\text{CDCl}_3$ )  $\delta$  7.42 (d,  $J = 5.5$  Hz, 1H), 7.17 (d,  $J = 5.5$  Hz, 1H), 5.65 (s, 1H), 5.61 (s, 1H), 4.31 (q,  $J = 7.1$  Hz, 2H), 4.14 (q,  $J = 7.1$  Hz, 2H), 3.36 (s, 2H), 1.35 (t,  $J = 7.1$  Hz, 3H), 1.24 (t,  $J = 7.1$  Hz, 3H) ppm;  $^{13}\text{C}$  NMR (101 MHz,  $\text{CDCl}_3$ )  $\delta$  169.6, 162.6, 143.3, 136.3, 130.9, 129.8, 125.1, 124.5, 61.0, 60.7, 42.1, 14.2, 14.0 ppm; IR (film)  $\nu = 2981, 2935, 1736, 1702, 1509, 1445 \text{ cm}^{-1}$ ; HRMS (ESI)  $m/z$  calcd for  $\text{C}_{13}\text{H}_{16}\text{NaO}_4\text{S}_2[\text{M}+\text{Na}]^+ = 323.0382$ , found = 323.0398.



Ethyl (E)-2-((4-ethoxy-4-oxo-1-phenylbut-1-en-2-yl)thio)-5-phenylthiophene-3-carboxylate **4a**

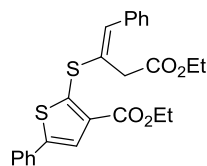

Crude  $^1\text{H NMR}$  show the E/Z ratio is more than 19:1. white solid, m.p. = 64.7 - 66.1 °C;  $^1\text{H NMR}$  (400 MHz,  $\text{CDCl}_3$ )  $\delta$  7.64 (s, 1H), 7.52 (d,  $J = 7.4$  Hz, 2H), 7.45 – 7.32 (m, 8H), 7.29 (d,  $J = 7.2$  Hz, 1H), 4.38 (q,  $J = 7.1$  Hz, 2H), 4.19 (q,  $J = 7.1$  Hz, 2H), 3.67 (s, 2H), 1.41 (t,  $J = 7.1$  Hz, 3H), 1.27 (t,  $J = 7.1$  Hz, 3H) ppm;  $^{13}\text{C NMR}$  (101 MHz,  $\text{CDCl}_3$ )  $\delta$  169.9, 162.8, 146.1, 142.8, 142.0, 135.6, 133.1, 129.7, 128.9, 128.8, 128.6, 128.4, 128.3, 127.9, 125.4, 125.0, 61.2, 60.8, 38.7, 14.4, 14.1 ppm; IR (KBr)  $\nu = 3030, 2927, 1735, 1702, 1441, 1225$   $\text{cm}^{-1}$ ; HRMS (ESI)  $m/z$  calcd for  $\text{C}_{25}\text{H}_{24}\text{NaO}_4\text{S}_2[\text{M}+\text{Na}]^+$  = 475.1008, found = 475.1012.

Ethyl (E)-2-((4-ethoxy-4-oxo-1-(p-tolyl)but-1-en-2-yl)thio)-5-(p-tolyl)thiophene-3-carboxylate **4b**

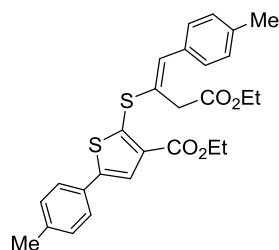

Crude  $^1\text{H NMR}$  show the E/Z ratio is more than 19:1. white solid, m.p. = 65.3-67.5 °C;  $^1\text{H NMR}$  (400 MHz,  $\text{CDCl}_3$ )  $\delta$  7.58 (s, 1H), 7.41 (d,  $J = 8.1$  Hz, 2H), 7.36 (s, 1H), 7.29 (d,  $J = 8.0$  Hz, 2H), 7.22 (d,  $J = 8.0$  Hz, 2H), 7.16 (d,  $J = 7.9$  Hz, 2H), 4.37 (q,  $J = 7.1$  Hz, 2H), 4.19 (q,  $J = 7.1$  Hz, 2H), 3.67 (s, 2H), 2.38 (s, 3H), 2.35 (s, 3H), 1.41 (t,  $J = 7.1$  Hz, 3H), 1.26 (t,  $J = 7.1$  Hz, 3H) ppm;  $^{13}\text{C NMR}$  (101 MHz,  $\text{CDCl}_3$ )  $\delta$  170.0, 162.8, 146.0, 143.1, 142.0, 138.3, 137.8, 132.7, 130.4, 129.6, 129.3, 128.9, 128.4, 127.8, 125.2, 124.4, 61.2, 60.7, 38.8, 21.2, 21.1, 14.4, 14.1 ppm; IR (KBr)  $\nu = 2980, 2922, 1735, 1702, 1441, 1224$   $\text{cm}^{-1}$ ; HRMS (ESI)  $m/z$  calcd for  $\text{C}_{27}\text{H}_{28}\text{NaO}_4\text{S}_2[\text{M}+\text{Na}]^+$  = 503.1321, found = 503.1331

Ethyl (E)-5-(4-(tert-butyl)phenyl)-2-((1-(4-(tert-butyl)phenyl)-4-ethoxy-4-oxobut-1-en-2-yl)thio)thiophene-3-carboxylate **4c**

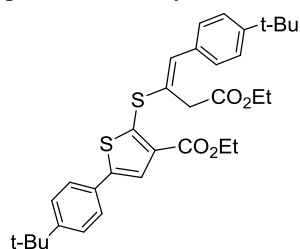

Crude  $^1\text{H NMR}$  show the E/Z ratio is more than 19:1. pale yellow oil;  $^1\text{H NMR}$  (400 MHz,  $\text{CDCl}_3$ )  $\delta$  7.59 (s, 1H), 7.47 – 7.42 (m, 4H), 7.38 (d,  $J = 8.4$  Hz, 2H), 7.37 (s, 1H), 7.34 (d,  $J = 8.4$  Hz, 2H), 4.37 (q,  $J = 7.1$  Hz, 2H), 4.20 (q,  $J = 7.1$  Hz, 2H), 3.69 (s, 2H), 1.41 (t,  $J = 7.1$  Hz, 3H), 1.34 (s, 9H), 1.33 (s, 9H), 1.27 (t,  $J = 7.1$  Hz, 3H) ppm;  $^{13}\text{C NMR}$  (101 MHz,  $\text{CDCl}_3$ )  $\delta$  170.1, 162.9, 151.5, 151.1, 146.3, 143.1, 142.0, 132.8, 130.4, 129.4, 128.3, 127.8, 125.8, 125.6, 125.2, 124.5, 61.2, 60.8, 38.9, 34.7, 34.6, 31.2, 14.4, 14.1 ppm; IR (film)  $\nu = 2962, 2902, 1735, 1702, 1507, 1438$   $\text{cm}^{-1}$ ; HRMS (ESI)  $m/z$  calcd for  $\text{C}_{33}\text{H}_{40}\text{NaO}_4\text{S}_2[\text{M}+\text{Na}]^+$  = 587.2260, found = 587.2266.

Ethyl (E)-2-((4-ethoxy-1-(4-methoxyphenyl)-4-oxobut-1-en-2-yl)thio)-5-(4-methoxyphenyl)thiophene-3-carboxylate **4d**

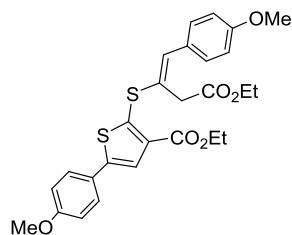

Crude  $^1\text{H}$ NMR show the E/Z ratio is 12:1. pale yellow oil;  $^1\text{H}$  NMR (400 MHz,  $\text{CDCl}_3$ )  $\delta$  7.50 (s, 1H), 7.43 (d,  $J = 8.7$  Hz, 2H), 7.35 (d,  $J = 8.7$  Hz, 2H), 7.32 (s, 1H), 6.93 (d,  $J = 8.7$  Hz, 2H), 6.88 (d,  $J = 8.8$  Hz, 2H), 4.36 (q,  $J = 7.1$  Hz, 2H), 4.18 (q,  $J = 7.1$  Hz, 2H), 3.83 (s, 3H), 3.81 (s, 3H), 3.66 (s, 2H), 1.40 (t,  $J = 7.1$  Hz, 3H), 1.26 (t,  $J = 7.1$  Hz, 3H) ppm;  $^{13}\text{C}$  NMR (101 MHz,  $\text{CDCl}_3$ )  $\delta$  170.1, 162.8, 159.6, 159.4, 145.7, 142.7, 141.8, 130.9, 129.9, 129.3, 128.1, 126.7, 126.0, 123.8, 114.3, 114.0, 61.2, 61.0, 60.7, 55.3, 55.2, 38.8, 14.4, 14.1 ppm; IR (film)  $\nu = 2932, 2834, 1732, 1699, 1606, 1507$   $\text{cm}^{-1}$ ; HRMS (ESI)  $m/z$  calcd for  $\text{C}_{27}\text{H}_{28}\text{NaO}_6\text{S}_2[\text{M}+\text{Na}]^+ = 535.1220$ , found = 535.1226.

Ethyl (E)-2-((4-ethoxy-1-(4-fluorophenyl)-4-oxobut-1-en-2-yl)thio)-5-(4-fluorophenyl)thiophene-3-carboxylate **4e**

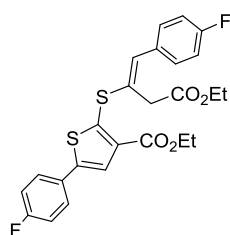

Crude  $^1\text{H}$ NMR show the E/Z ratio is more than 19:1. pale yellow gel;  $^1\text{H}$  NMR (400 MHz,  $\text{CDCl}_3$ )  $\delta$  7.55 (s, 1H), 7.51 – 7.45 (m, 2H), 7.39 – 7.36 (m, 2H), 7.32 (s, 1H), 7.13 – 7.03 (m, 4H), 4.36 (q,  $J = 7.1$  Hz, 2H), 4.18 (q,  $J = 7.1$  Hz, 2H), 3.61 (s, 2H), 1.40 (t,  $J = 7.1$  Hz, 3H), 1.26 (t,  $J = 7.1$  Hz, 3H) ppm;  $^{13}\text{C}$  NMR (101 MHz,  $\text{CDCl}_3$ )  $\delta$  169.9, 162.7, 162.6 (d,  $J_{\text{C-F}} = 248.9$  Hz), 162.5 (d,  $J_{\text{C-F}} = 248.2$  Hz), 141.5, 141.5, 141.2, 131.6 (d,  $J_{\text{C-F}} = 2.7$  Hz), 130.3 (d,  $J_{\text{C-F}} = 8.2$  Hz), 129.4 (d,  $J_{\text{C-F}} = 3.5$  Hz), 128.8, 128.8, 127.2 (d,  $J_{\text{C-F}} = 8.1$  Hz), 125.0, 116.0 (d,  $J_{\text{C-F}} = 22.0$  Hz), 115.7 (d,  $J_{\text{C-F}} = 21.6$  Hz), 61.4, 60.9, 38.6, 14.4, 14.1 ppm; IR (film)  $\nu = 2988, 2917, 1736, 1700, 1655, 1507$   $\text{cm}^{-1}$ ; HRMS (ESI)  $m/z$  calcd for  $\text{C}_{25}\text{H}_{22}\text{F}_2\text{NaO}_4\text{S}_2[\text{M}+\text{Na}]^+ = 511.0820$ , found = 511.0829.

Ethyl (E)-2-((4-ethoxy-1-(naphthalen-2-yl)-4-oxobut-1-en-2-yl)thio)-5-(naphthalen-2-yl)thiophene-3-carboxylate **4f**

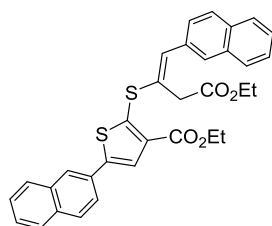

Crude  $^1\text{H}$ NMR show the E/Z ratio is more than 19:1. pale yellow gel;  $^1\text{H}$  NMR (400 MHz,  $\text{CDCl}_3$ )  $\delta$  7.93 (d,  $J = 8.5$  Hz, 2H), 7.90 – 7.79 (m, 6H), 7.78 (s, 1H), 7.67 (dd,  $J = 8.6, 1.7$  Hz, 1H), 7.57 (s, 1H),

7.55 – 7.50 (m, 3H), 7.49 – 7.44 (m, 2H), 4.42 (q,  $J = 7.1$  Hz, 2H), 4.23 (q,  $J = 7.1$  Hz, 2H), 3.78 (s, 2H), 1.45 (t,  $J = 7.1$  Hz, 3H), 1.30 (t,  $J = 7.1$  Hz, 3H) ppm;  $^{13}\text{C}$  NMR (101 MHz,  $\text{CDCl}_3$ )  $\delta$  170.0, 162.8, 146.4, 142.9, 142.2, 133.44, 133.2, 133.0, 132.9, 132.8, 130.5, 129.9, 129.0, 128.7, 128.3, 128.3, 128.0, 127.9, 127.7, 126.7, 126.6, 126.5, 126.2, 126.1, 125.4, 123.9, 123.5, 61.3, 60.9, 38.9, 14.4, 14.2 ppm; IR (film)  $\nu = 3063, 2980, 2923, 1733, 1701, 1596\text{ cm}^{-1}$ ; HRMS (ESI)  $m/z$  calcd for  $\text{C}_{33}\text{H}_{28}\text{NaO}_4\text{S}_2$   $[\text{M}+\text{Na}]^+ = 575.1321$ , found = 575.1324

Ethyl (E)-5-([1,1'-biphenyl]-4-yl)-2-((1-([1,1'-biphenyl]-4-yl)-4-ethoxy-4-oxobut-1-en-2-yl)thio)thiophene-3-carboxylate **4g**

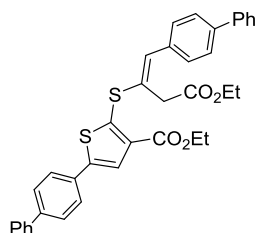

Crude  $^1\text{H}$ NMR show the E/Z ratio is 14:1. pale yellow gel;  $^1\text{H}$  NMR (400 MHz,  $\text{CDCl}_3$ )  $\delta$  7.69 (s, 1H), 7.67 (s, 1H), 7.65 – 7.58 (m, 10H), 7.50 (d,  $J = 7.9$  Hz, 2H), 7.46 (d,  $J = 6.3$  Hz, 2H), 7.44 (d,  $J = 6.8$  Hz, 2H), 7.37 (dd,  $J = 14.1, 7.2$  Hz, 2H), 4.40 (q,  $J = 7.1$  Hz, 2H), 4.22 (q,  $J = 7.1$  Hz, 2H), 3.74 (s, 2H), 1.44 (t,  $J = 7.1$  Hz, 3H), 1.29 (t,  $J = 7.2$  Hz, 3H) ppm;  $^{13}\text{C}$  NMR (101 MHz,  $\text{CDCl}_3$ )  $\delta$  170.0, 162.8, 146.2, 142.4, 141.7, 141.2, 140.7, 140.3, 140.2, 134.5, 132.1, 129.9, 129.8, 129.0, 128.8, 127.6, 127.5, 127.3, 127.0, 126.9, 125.8, 125.1, 125.0, 61.3, 60.9, 38.9, 14.4, 14.1 ppm; IR (film)  $\nu = 3030, 2980, 1734, 1701, 1487, 1438\text{ cm}^{-1}$ ; HRMS (ESI)  $m/z$  calcd for  $\text{C}_{37}\text{H}_{32}\text{NaO}_4\text{S}_2$   $[\text{M}+\text{Na}]^+ = 627.1634$ , found = 627.1641.

Ethyl (E)-5-(benzo[d][1,3]dioxol-5-yl)-2-((1-(benzo[d][1,3]dioxol-5-yl)-4-ethoxy-4-oxobut-1-en-2-yl)thio)thiophene-3-carboxylate **4h**

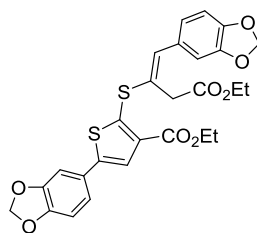

Crude  $^1\text{H}$ NMR show the E/Z ratio is more than 19:1. pale yellow gel;  $^1\text{H}$  NMR (400 MHz,  $\text{CDCl}_3$ )  $\delta$  7.47 (s, 1H), 7.27 (s, 1H), 6.99 (s, 1H), 6.99 – 6.96 (m, 1H), 6.90 (s, 1H), 6.88 (d,  $J = 8.5$  Hz, 1H), 6.83 (d,  $J = 8.0$  Hz, 1H), 6.78 (d,  $J = 8.6$  Hz, 1H), 5.99 (s, 2H), 5.98 (s, 2H), 4.35 (q,  $J = 7.1$  Hz, 2H), 4.18 (q,  $J = 7.1$  Hz, 2H), 3.64 (s, 2H), 1.39 (t,  $J = 7.2$  Hz, 3H), 1.26 (t,  $J = 7.1$  Hz, 3H) ppm;  $^{13}\text{C}$  NMR (101 MHz,  $\text{CDCl}_3$ )  $\delta$  170.0, 162.8, 148.2, 147.9, 147.7, 147.6, 145.7, 145.6, 142.7, 142.7, 141.9, 129.6, 127.5, 124.3, 122.9, 119.4, 108.6, 108.6, 108.5, 106.0, 101.3, 101.3, 61.3, 60.8, 38.8, 14.4, 14.1 ppm; IR (film)  $\nu = 2980, 2920, 1734, 1701, 1502, 1489\text{ cm}^{-1}$ ; HRMS (ESI)  $m/z$  calcd for  $\text{C}_{27}\text{H}_{24}\text{NaO}_8\text{S}_2$   $[\text{M}+\text{Na}]^+ = 563.0805$ , found = 563.0813.

Ethyl (E)-5-(2,3-dihydrobenzofuran-5-yl)-2-((1-(2,3-dihydrobenzofuran-5-yl)-4-ethoxy-4-oxobut-1-en-2-yl)thio)thiophene-3-carboxylate **4i**

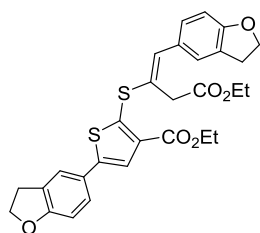

Crude  $^1\text{H}$ NMR show the E/Z ratio is more than 19:1. pale yellow gel;  $^1\text{H}$  NMR (400 MHz,  $\text{CDCl}_3$ )  $\delta$  7.46 (s, 1H), 7.35 (s, 1H), 7.31 (s, 1H), 7.27 – 7.25 (m, 2H), 7.17 (d,  $J = 8.3$  Hz, 1H), 6.80 (d,  $J = 8.3$  Hz, 1H), 6.75 (d,  $J = 8.3$  Hz, 1H), 4.60 (td,  $J = 8.7, 6.2$  Hz, 4H), 4.35 (q,  $J = 7.1$  Hz, 2H), 4.18 (q,  $J = 7.1$  Hz, 2H), 3.67 (s, 2H), 3.23 (q,  $J = 8.3$  Hz, 4H), 1.39 (t,  $J = 7.1$  Hz, 3H), 1.26 (t,  $J = 7.1$  Hz, 3H) ppm;  $^{13}\text{C}$  NMR (101 MHz,  $\text{CDCl}_3$ )  $\delta$  171.1, 170.2, 162.9, 160.4, 160.1, 143.4, 142.3, 130.4, 129.0, 128.1, 127.9, 127.6, 126.1, 126.0, 125.7, 125.2, 123.6, 122.3, 109.5, 109.4, 71.5, 71.5, 61.2, 60.7, 38.9, 29.5, 29.5, 14.4, 14.1 ppm; IR (film)  $\nu = 2980, 2922, 1734, 1701, 1611, 1491$   $\text{cm}^{-1}$ ; HRMS (ESI)  $m/z$  calcd for  $\text{C}_{29}\text{H}_{28}\text{NaO}_6\text{S}_2[\text{M}+\text{Na}]^+ = 559.1220$ , found = 559.1222.

### E. Gram scale synthesis of 2I

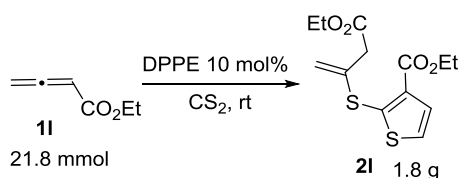

To a dried 100 mL round-bottomed flask with a magnetic stirring bar were added ethyl buta-2,3-dienoate **1I** (21.8 mmol, 2.44g) and  $\text{CS}_2$  (50 mL), followed by the addition of DPPE (2.18 mmol, 0.87 g) at room temperature. The resulting mixture was stirred overnight. After the completely consumption of **1I** monitored by TLC, the mixture was evaporated to remove  $\text{CS}_2$  and the residue was purified by column chromatography on silica gel with PE/Ea = 10:1 as eluent to afford product **2I** (1.8g, 55% yield) as a yellow oil.

### F. Reaction of 2I with benzyne

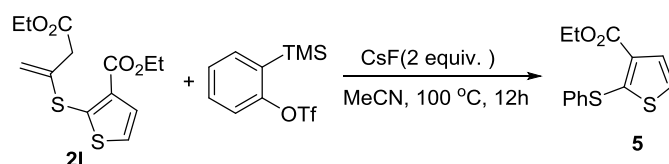

To a dried sealed tube with a magnetic stirring bar were added  $\text{CsF}$  (0.4 mmol, 60.8 mg) and acetonitrile (1.5 mL), followed by the addition of **2I** (0.2 mmol, 60.1 mg) and benzyne precursor (0.3 mmol, 89.5 mg). The resulting mixture was sealed and stirred at 100 °C. After the completely

consumption of **11** monitored by TLC (about 12 h), the mixture was evaporated to remove solvent and the residue was purified by column chromatography on silica gel with PE/Ea = 10:1 as eluent to afford product **5** (22.7 mg, 55% yield) as a white powder, m.p. = 46.0-48.0 °C; <sup>1</sup>H NMR (400 MHz, CDCl<sub>3</sub>) δ 7.67 – 7.60 (m, 2H), 7.43 – 7.42 (m, 3H), 7.38 (d, *J* = 5.4 Hz, 1H), 6.95 (d, *J* = 5.4 Hz, 1H), 4.36 (q, *J* = 7.1 Hz, 2H), 1.38 (t, *J* = 7.1 Hz, 3H) ppm; <sup>13</sup>C NMR (101 MHz, CDCl<sub>3</sub>) δ 163.1, 151.0, 134.5, 133.2, 129.7, 129.2, 127.2, 122.7, 60.7, 14.4 ppm; IR (KBr) ν = 2980, 2927, 1698, 1509, 1421, 1260 cm<sup>-1</sup>; HRMS (ESI) *m/z* calcd for C<sub>13</sub>H<sub>13</sub>O<sub>2</sub>S<sub>2</sub>[M+H]<sup>+</sup> = 265.0351, found = 265.0365.

## G. Transformation of **21**

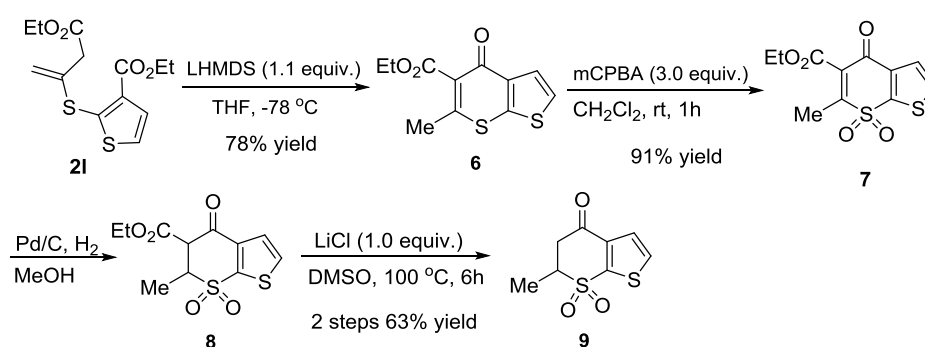

### Step 1

To the solution of **21** (5 mmol, 1.502 g) in 25 mL anhydrous THF was added dropwise LHMDS (5.5 mmol, 5.5 mL, 1 mol/L in THF) over 15 min at -78 °C under Nitrogen atmosphere. The mixture was stirred at the same temperature for one hour, and then was warmed to 0 °C and kept stirring. After the completely consumption of **21** monitored by TLC (about one hour), 20 mL saturated NH<sub>4</sub>Cl aqueous solution was added and separated. The aqueous phase was extracted by Ea (20 mL × 2), and the organic phase was combined, dried by Na<sub>2</sub>SO<sub>4</sub> and filtered. The filtrate was concentrated under vacuum to remove solvent and the residue was purified by column chromatography on silica gel with PE/Ea = 5:1 as eluent to afford product **6** (0.992 g, 78% yield) as a white powder, m.p. = 102.8-103.6 °C; <sup>1</sup>H NMR (400 MHz, CDCl<sub>3</sub>) δ 7.73 (d, *J* = 5.4 Hz, 1H), 7.42 (d, *J* = 5.4 Hz, 1H), 4.42 (q, *J* = 7.1 Hz, 2H), 2.48 (s, 3H), 1.39 (t, *J* = 7.1 Hz, 3H) ppm; <sup>13</sup>C NMR (101 MHz, CDCl<sub>3</sub>) δ 173.6, 165.9, 147.4, 142.6, 137.1, 132.2, 125.9, 125.3, 61.9, 21.0, 14.2 ppm; IR (film) ν = 3109, 2920, 1934, 1683, 1647, 1507cm<sup>-1</sup>; HRMS (ESI) *m/z* calcd for C<sub>11</sub>H<sub>11</sub>O<sub>3</sub>S<sub>2</sub>[M+H]<sup>+</sup> = 255.0144, found = 255.0149.

### Step 2

To the solution of **6** (3.6 mmol, 0.916g g) in 25 mL anhydrous DCM was added mCPBA (10.8 mmol,

1.86g) and the resulting mixture was stirred at room temperature. After the completely consumption of **6** monitored by TLC (about one hour), the mixture was concentrated under vacuum to remove solvent and the residue was purified by column chromatography on silica gel with PE/Ea = 5:1 as eluent to afford product **7** (0.938 g, 91% yield) as a white powder, m.p. = 118.2-121.2 °C; <sup>1</sup>H NMR (400 MHz, CDCl<sub>3</sub>) δ 7.69 (d, *J* = 5.1 Hz, 1H), 7.56 (d, *J* = 5.1 Hz, 1H), 4.41 (q, *J* = 7.1 Hz, 2H), 2.38 (s, 3H), 1.37 (t, *J* = 7.1 Hz, 3H) ppm; <sup>13</sup>C NMR (101 MHz, CDCl<sub>3</sub>) δ 171.8, 162.3, 150.9, 144.0, 137.4, 133.8, 130.8, 126.2, 62.7, 14.0, 11.6 ppm; IR (film) *ν* = 2927, 2814, 2026, 1724, 1661, 1631 cm<sup>-1</sup>; HRMS (ESI) *m/z* calcd for C<sub>11</sub>H<sub>11</sub>O<sub>5</sub>S<sub>2</sub>[M+H]<sup>+</sup> = 287.0042, found = 287.0044.

### Step 3

To a 25 mL round-bottomed flask with a magnetic stirring bar were added compound **7** (2 mmol, 0.572 g) and 10% Pd/C (60 mg), followed by the addition of 10 mL Methanol. The RBF was connected with vacuum bump and Hydrogen balloon. After switched 4 times of vacuum and Hydrogen, the mixture was stirred at room temperature overnight. when compound **7** was completely consumed monitored by TLC, the mixture was filtered through a short pad of Celite and the filtrate was concentrated under vacuum to remove solvent to afford crude product **8**, which was used directly in the next step.

### Step 4

To the solution of above product **8** in 10 mL DMSO was added LiCl (2 mmol, 84.8 mg), and the resulting solution was stirred at 100 °C. After the completely consumption of **8** monitored by TLC (about 6 hour), the mixture was cooled to room temperature, then added 20 mL water and 20 mL ether. After separation, the aqueous phase was extracted by ether (20 mL ×2). The organic phase was combined, washed by brine, dried by Na<sub>2</sub>SO<sub>4</sub> and filtered. The filtrate was concentrated under vacuum to remove solvent and the residue was purified by column chromatography on silica gel with PE/Ea = 5:1 as eluent to afford product **9** (272.5 mg, 63% yield in two steps) as a white powder, m.p. = 99.9 – 102 °C; <sup>1</sup>H NMR (400 MHz, CDCl<sub>3</sub>) δ 7.60 (d, *J* = 5.1 Hz, 1H), 7.48 (d, *J* = 5.1 Hz, 1H), 3.86 (ddd, *J* = 9.3, 6.9, 4.6 Hz, 1H), 3.41 – 3.03 (m, 2H), 1.56 (d, *J* = 6.9 Hz, 3H); <sup>13</sup>C NMR (101 MHz, CDCl<sub>3</sub>) δ 186.5, 146.8, 139.8, 130.6, 126.1, 58.0, 44.7, 11.7; HRMS (ESI) *m/z* calcd for C<sub>8</sub>H<sub>9</sub>O<sub>3</sub>S<sub>2</sub>[M+H]<sup>+</sup> = 216.9988, found = 216.9989.

## H. Control experiment with Maleimide

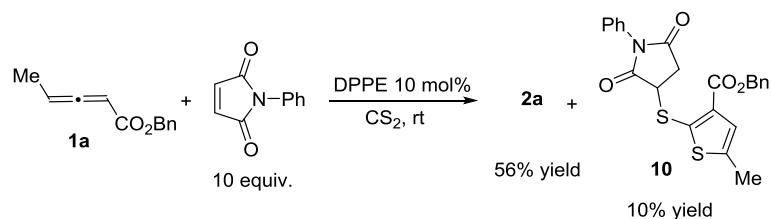

To a dried sealed tube with a magnetic stirring bar were added allenolate **1a** (0.4 mmol, 75.3 mg), N-phenyl Maleimide (4 mmol, 692.7 mg) and CS<sub>2</sub> (2 mL). After the mixture became clear, DPPE (0.04 mmol, 15.9 mg) was added and the mixture was stirred at room temperature overnight. When allenolate **1a** was completely consumed monitored by TLC, the mixture was purified directly by column chromatography on silica gel with PE/Ea as eluent to afford product **2a** (50.7 mg, 56% yield) and **10** (17.5 mg, 10% yield) as a yellow solid, m.p. = 137.2 – 139.0 °C; <sup>1</sup>H NMR (400 MHz, CDCl<sub>3</sub>) δ 7.49 – 7.35 (m, 8H), 7.27 – 7.24 (m, 2H), 7.20 (s, 1H), 5.30 (s, 2H), 4.43 (dd, *J* = 9.2, 4.0 Hz, 1H), 3.22 (dd, *J* = 19.0, 9.2 Hz, 1H), 2.88 (dd, *J* = 19.0, 4.0 Hz, 1H), 2.43 (s, 3H) ppm; <sup>13</sup>C NMR (101 MHz, CDCl<sub>3</sub>) δ 173.8, 173.3, 162.2, 142.6, 135.6, 135.0, 134.6, 131.5, 129.2, 128.8, 128.6, 128.4, 128.2, 126.3, 66.8, 44.7, 35.3, 15.4 ppm; IR (KBr)  $\nu$  = 2914, 2843, 1783, 1716, 1702, 1495 cm<sup>-1</sup>; HRMS (ESI) *m/z* calcd for C<sub>23</sub>H<sub>19</sub>NNaO<sub>4</sub>S<sub>2</sub>[M+Na]<sup>+</sup> = 460.0648, found = 460.0655.

## I. X-Ray crystallographic analysis of 4a

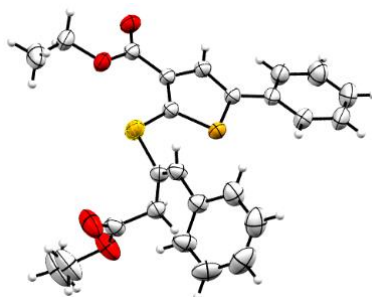

Figure 1. X-ray structure of **4a**

Table 1. Crystal data and structure refinement for **4a** (CCDC 2018743)

|                   |                                                               |
|-------------------|---------------------------------------------------------------|
| Empirical formula | C <sub>25</sub> H <sub>24</sub> O <sub>4</sub> S <sub>2</sub> |
| Formula weight    | 452.56                                                        |
| Temperature       | 296K                                                          |
| Wavelength        | 0.71073 Å                                                     |

|                                   |                                             |                         |
|-----------------------------------|---------------------------------------------|-------------------------|
| Crystal system                    | monoclinic                                  |                         |
| Space group                       | P 1 21/c 1                                  |                         |
| Unit cell dimensions              | a = 10.917 (3) Å                            | $\alpha = 90^\circ$     |
|                                   | b = 7.526 (3) Å                             | $\beta = 100.154^\circ$ |
|                                   | c = 26.688 (11) Å                           | $\gamma = 90^\circ$     |
| Volume                            | 2320.1 (14) Å <sup>3</sup>                  |                         |
| Z                                 | 4                                           |                         |
| Density (calculated)              | 1.296 Mg/m <sup>3</sup>                     |                         |
| Absorption coefficient            | 0.258 mm <sup>-1</sup>                      |                         |
| F(000)                            | 952                                         |                         |
| Crystal size                      | 0.664 x 0.305 x 0.16 mm <sup>3</sup>        |                         |
| Theta range for data collection   | 2.576 to 30.548 °                           |                         |
| Index ranges                      | -15<=h<=15, -10<=k<=10, -40<=l<=40          |                         |
| Reflections collected             | 38600                                       |                         |
| Independent reflections           | 7096 [R(int) = 0.0330]                      |                         |
| Completeness to theta = 25.242 °  | 99.9 %                                      |                         |
| Absorption correction             | multi-scan from equivalents                 |                         |
| Max. and min. transmission        | 1.00000 and 0.9073                          |                         |
| Refinement method                 | Full-matrix least-squares on F <sup>2</sup> |                         |
| Data / restraints / parameters    | 7096 / 0 / 282                              |                         |
| Goodness-of-fit on F <sup>2</sup> | 1.031                                       |                         |
| Final R indices [I>2sigma(I)]     | R1 = 0.0462, wR2 = 0.1241                   |                         |
| R indices (all data)              | R1 = 0.0614, wR2 = 0.1377                   |                         |
| Largest diff. peak and hole       | 0.454 and -0.408 e.Å <sup>-3</sup>          |                         |

## **J. Reference**

1. Rout, L.; Harned, A. M. *Chem. Eur. J.* **2009**, *15*, 12926 – 12928.
2. Kalek, M.; Fu, G. C. *J. Am. Chem. Soc.* **2015**, *137*, 9438 - 9442.



# K. Spectra

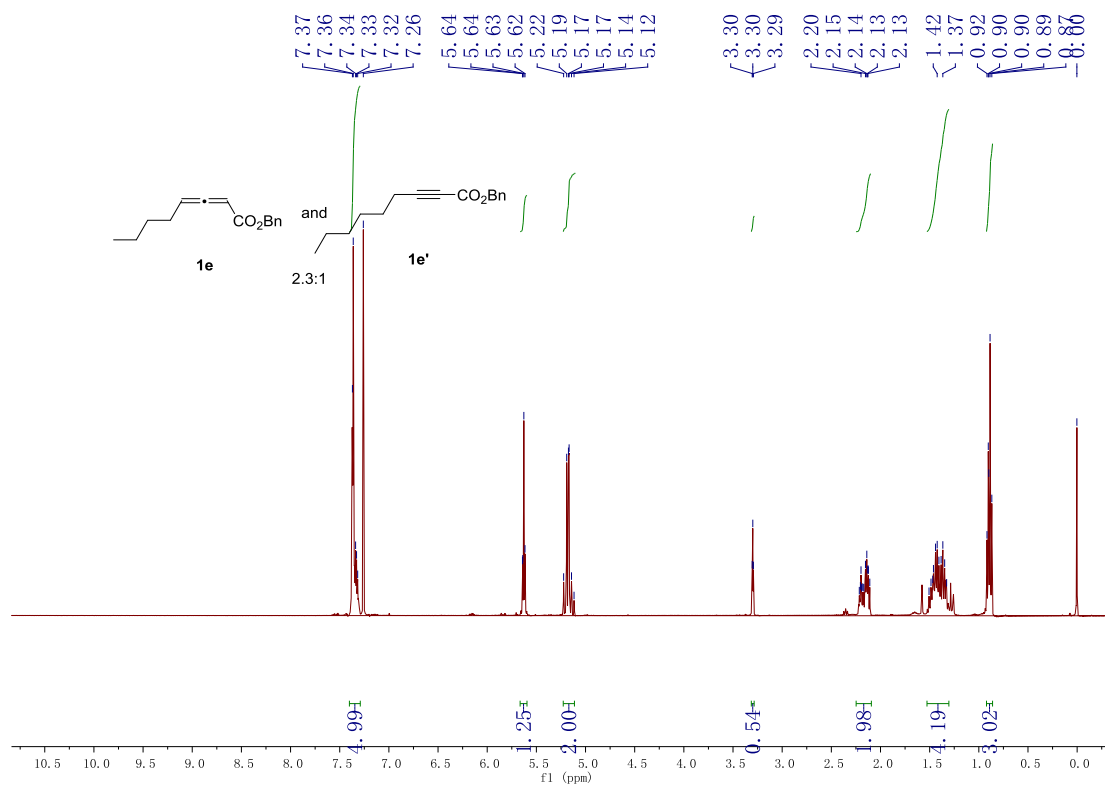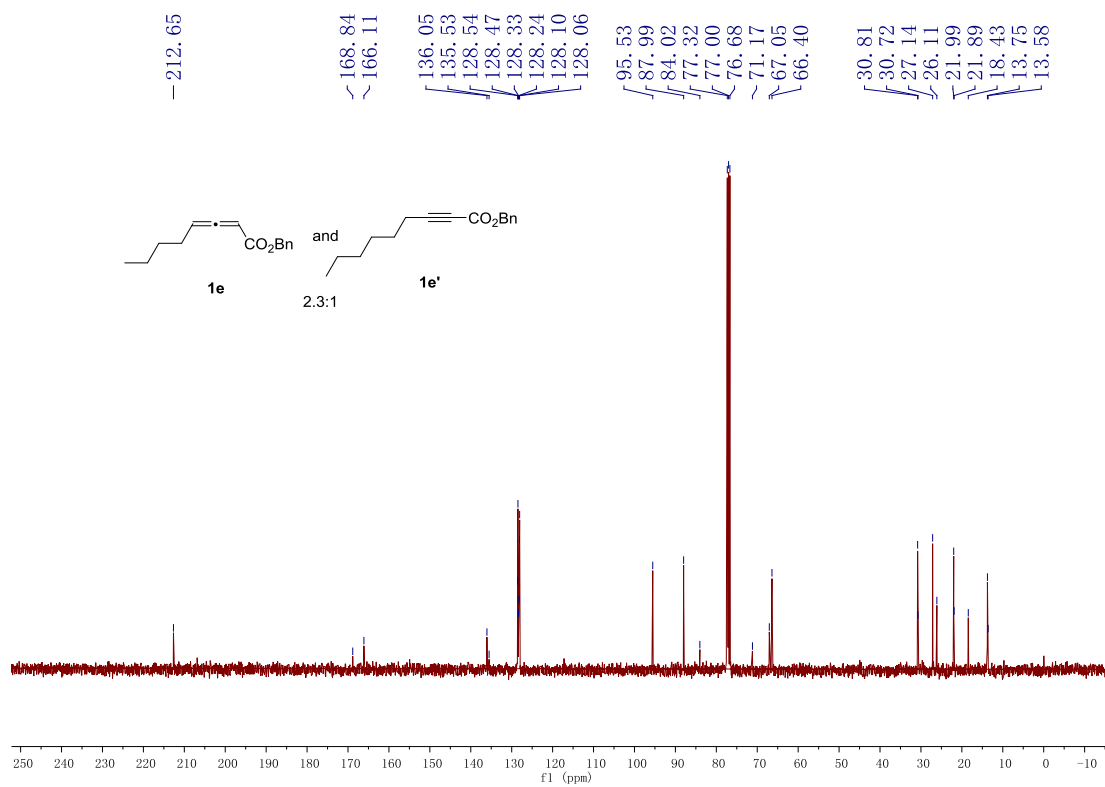

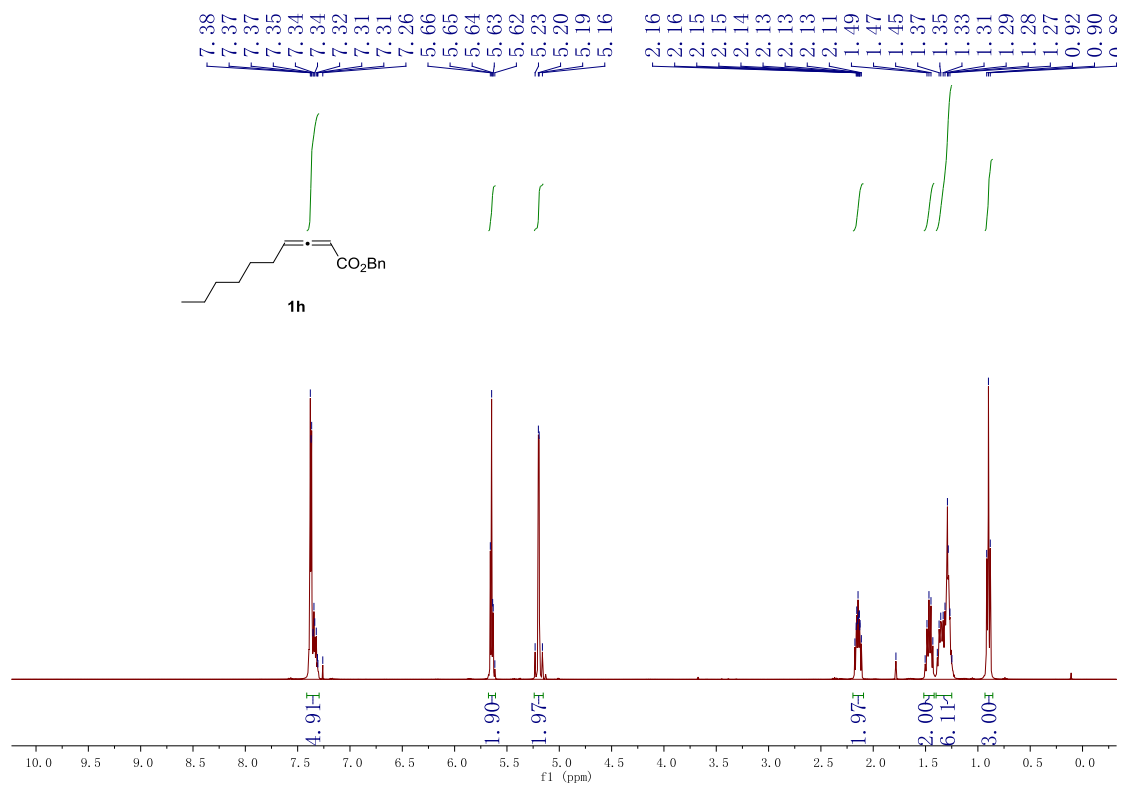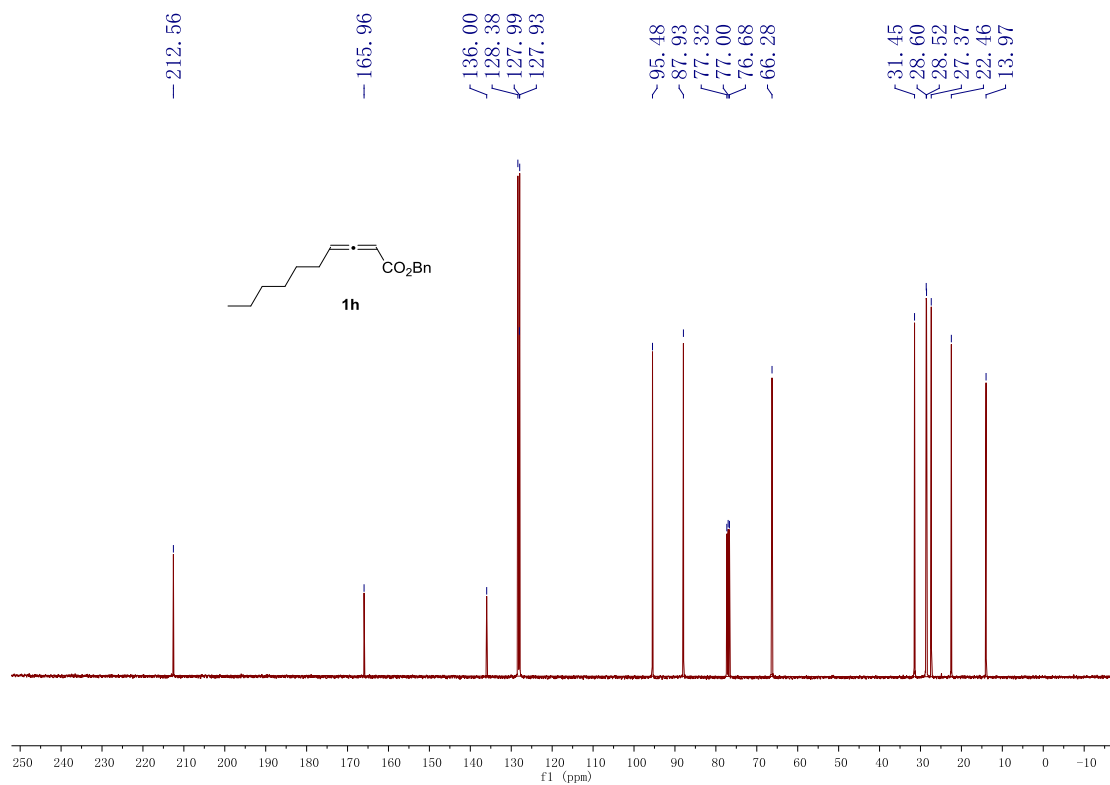

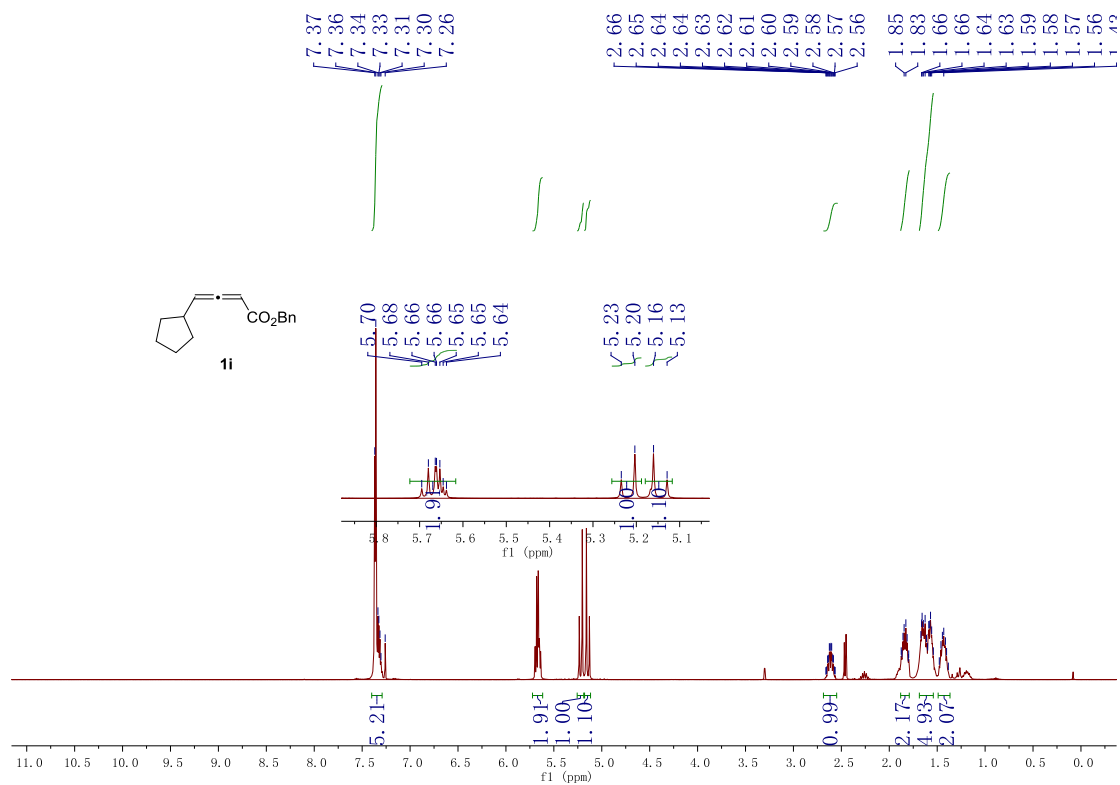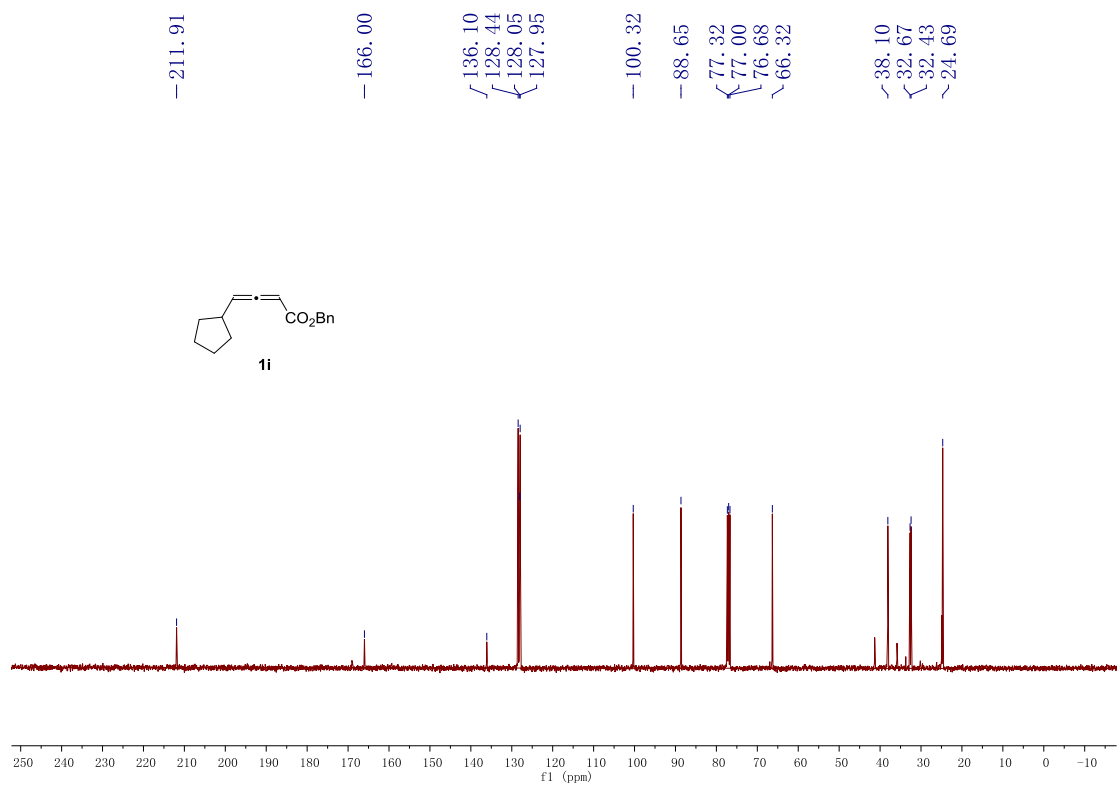

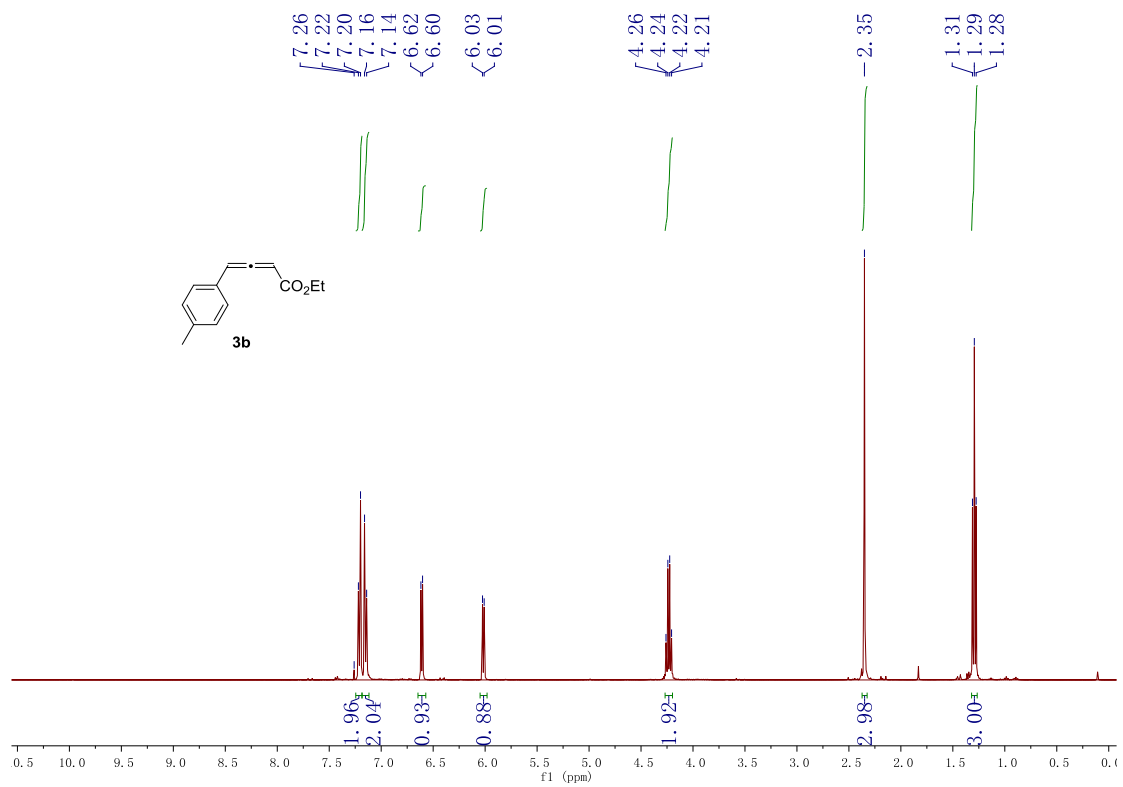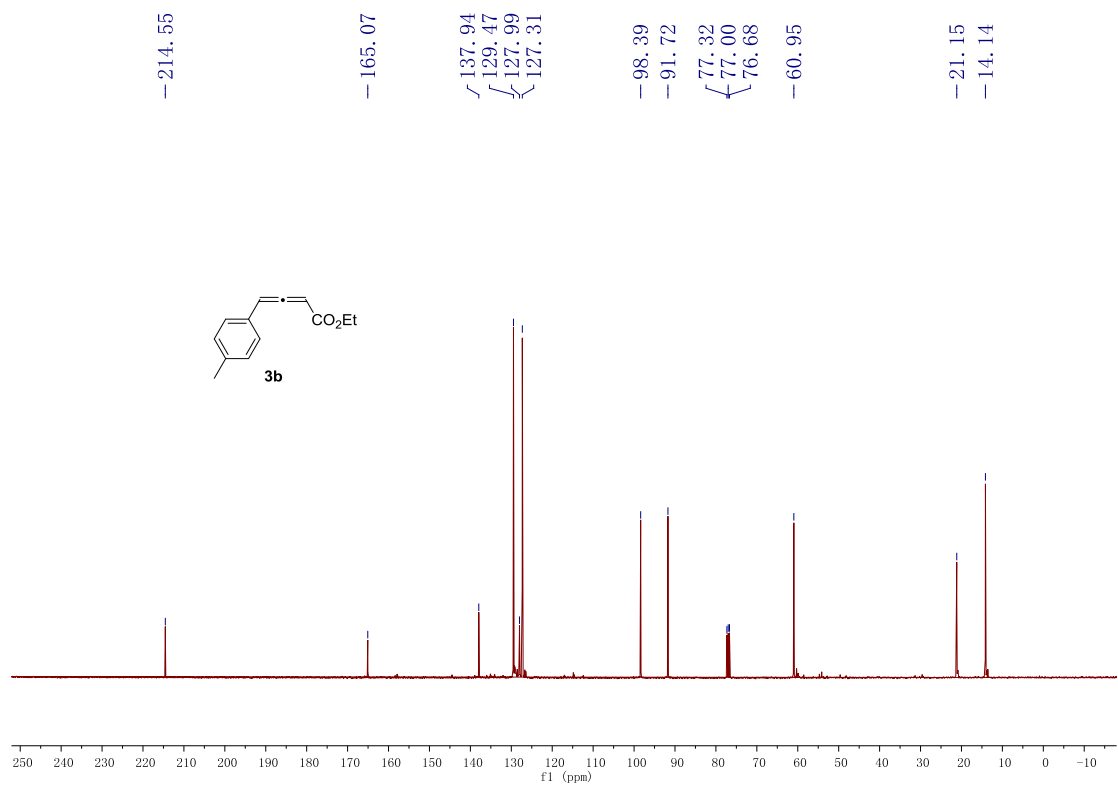

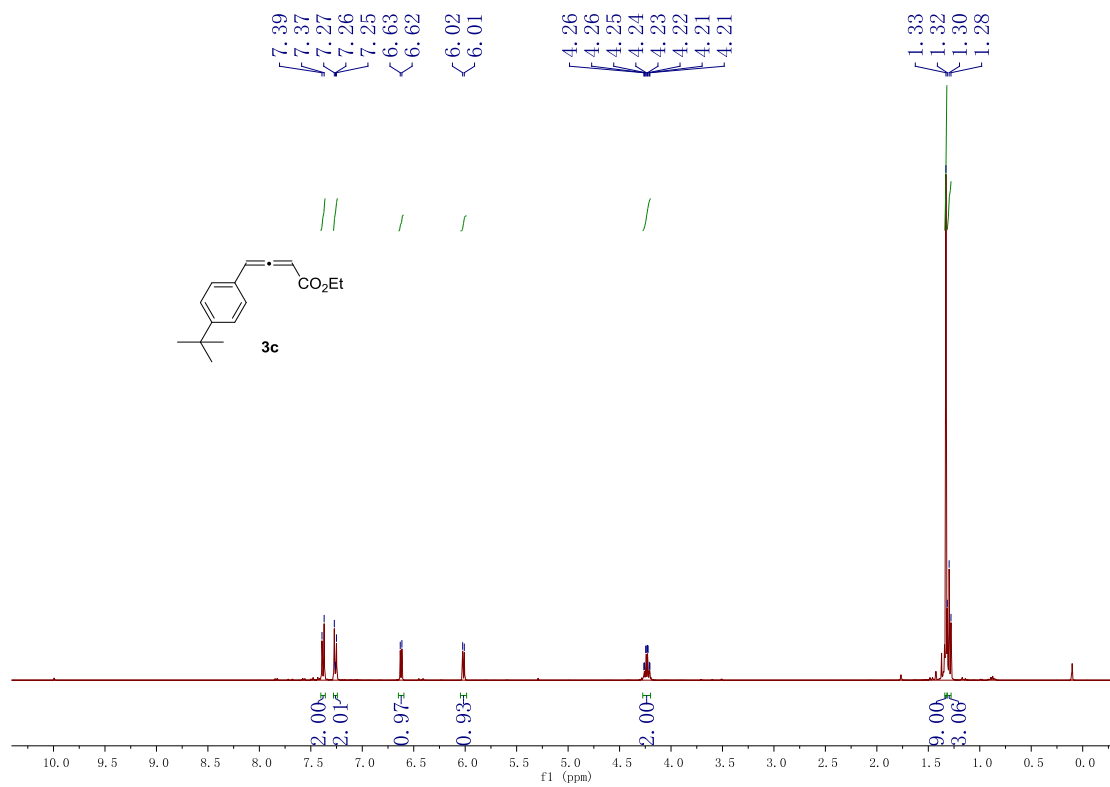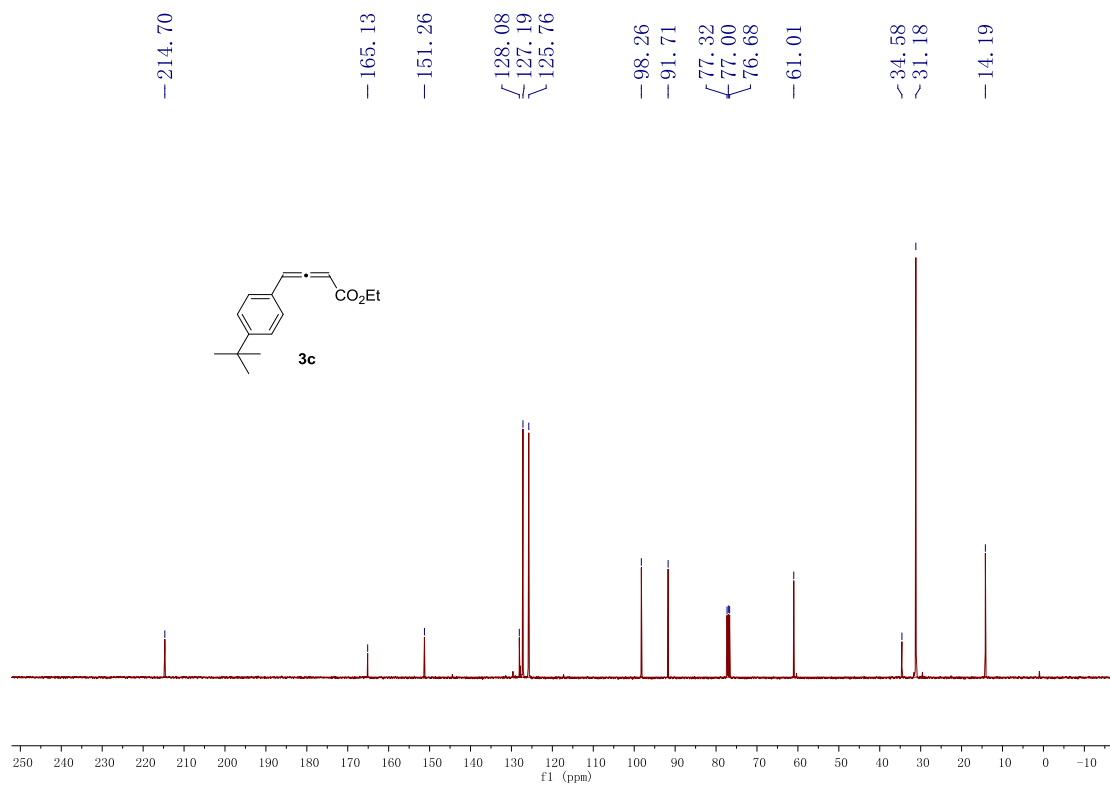

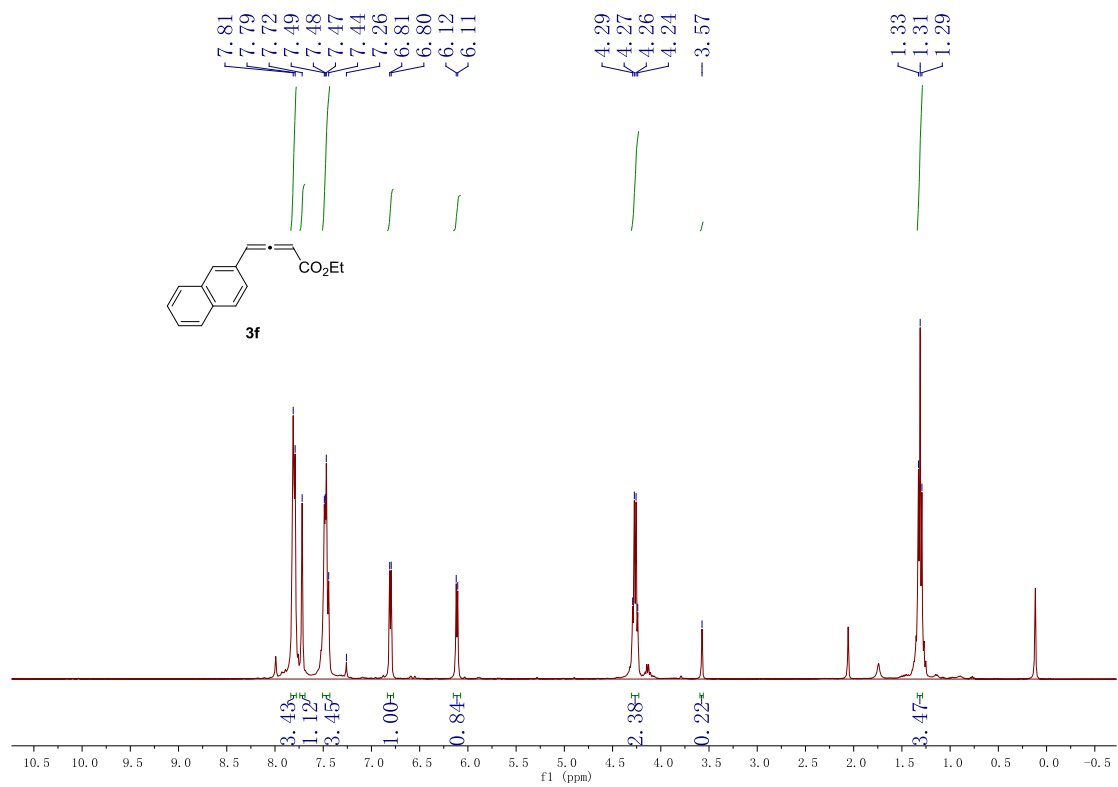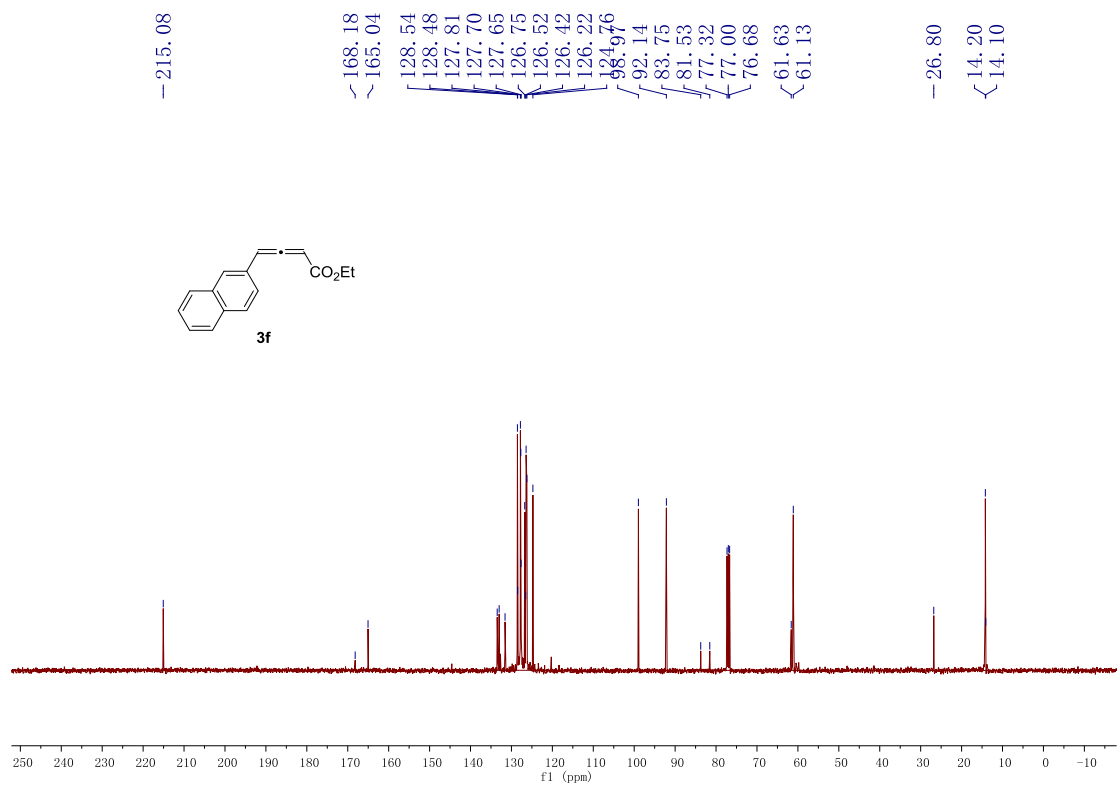

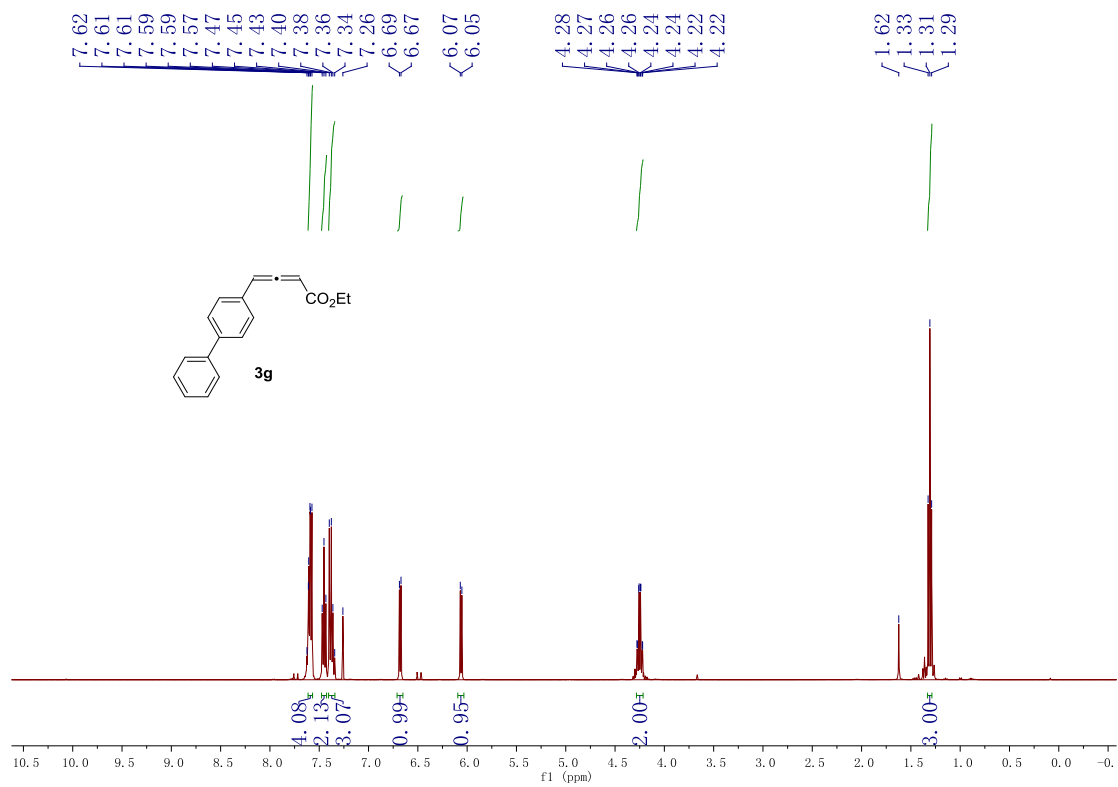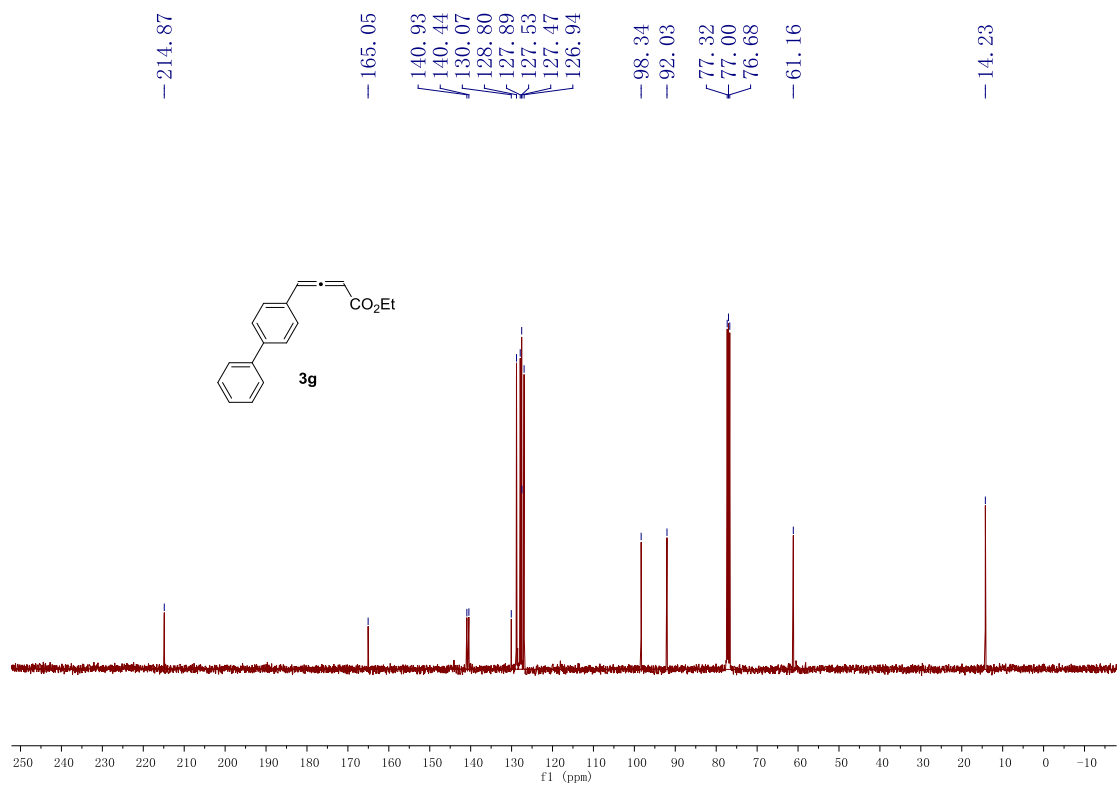

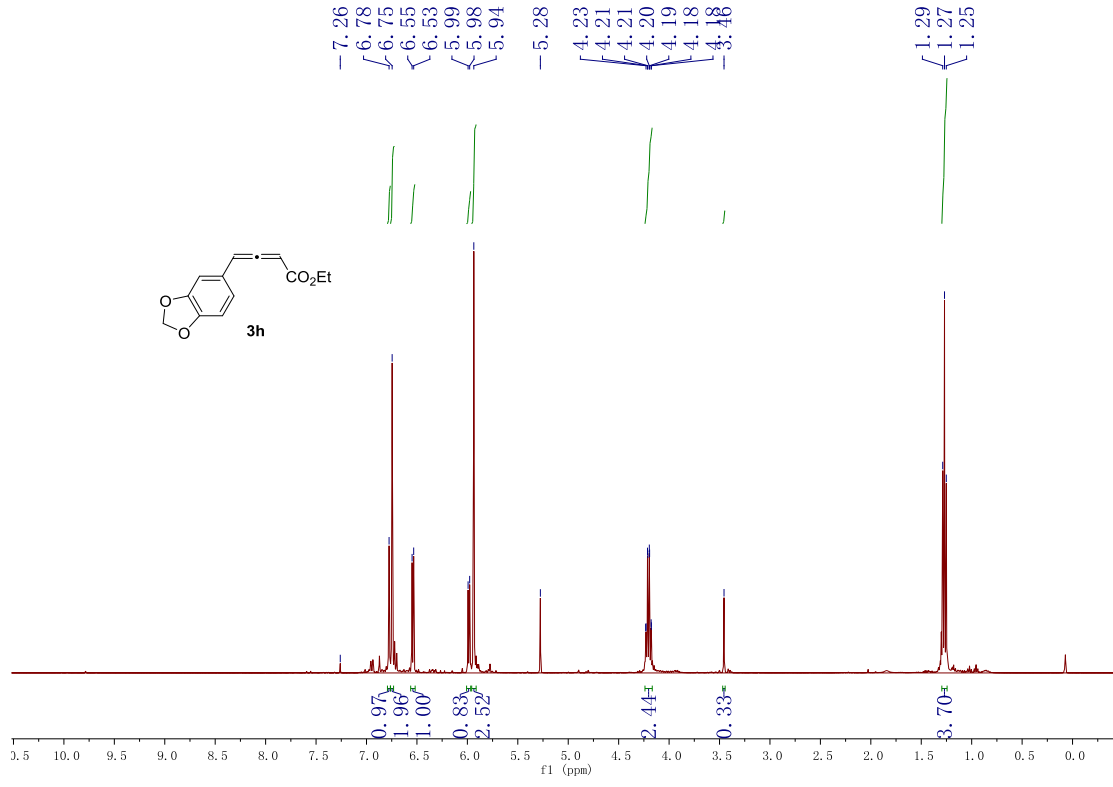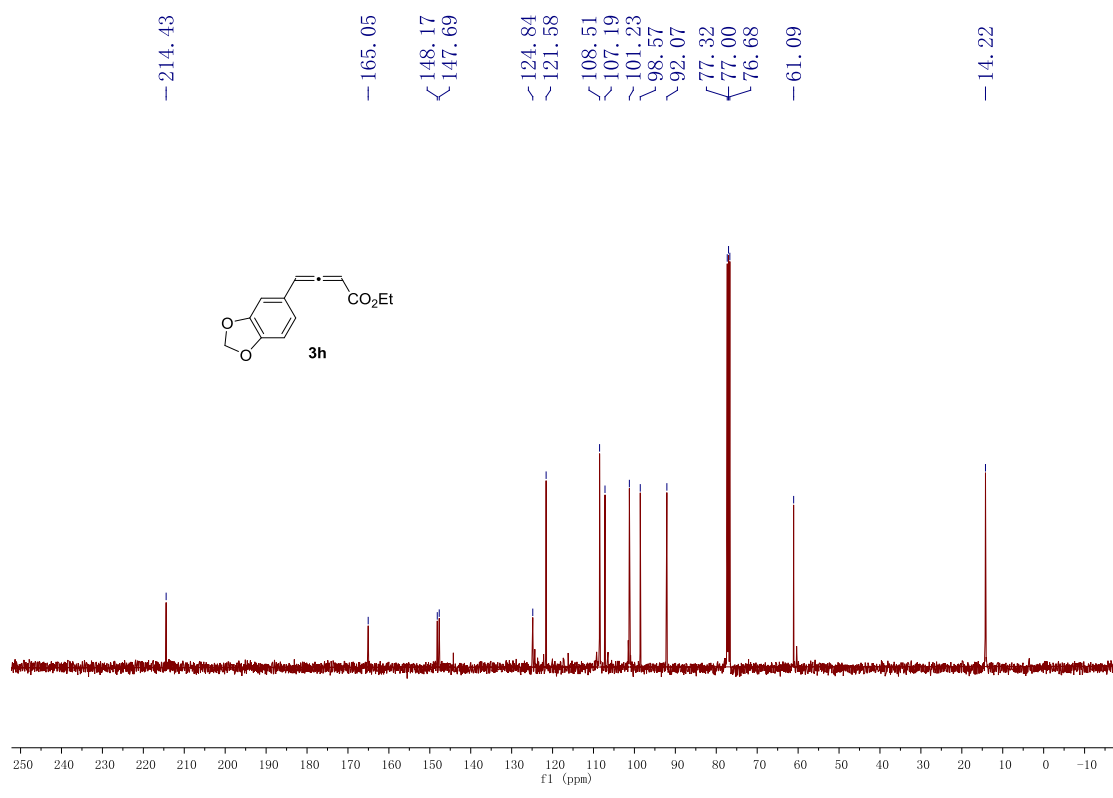



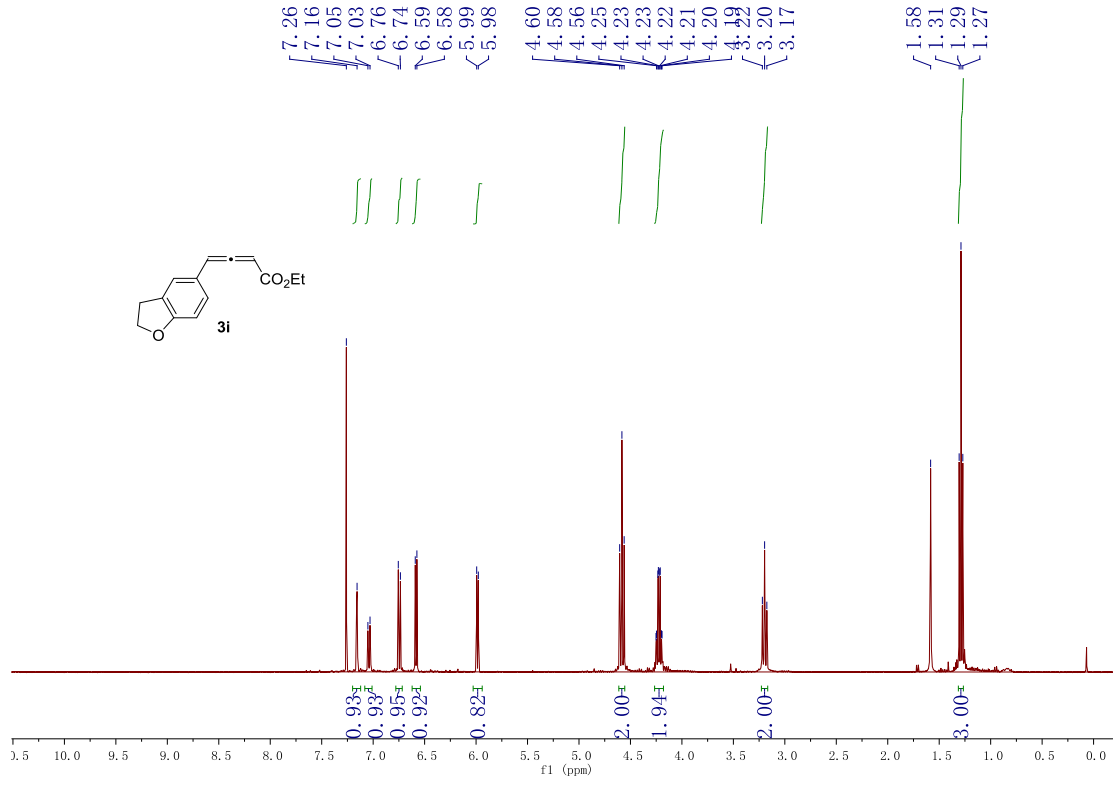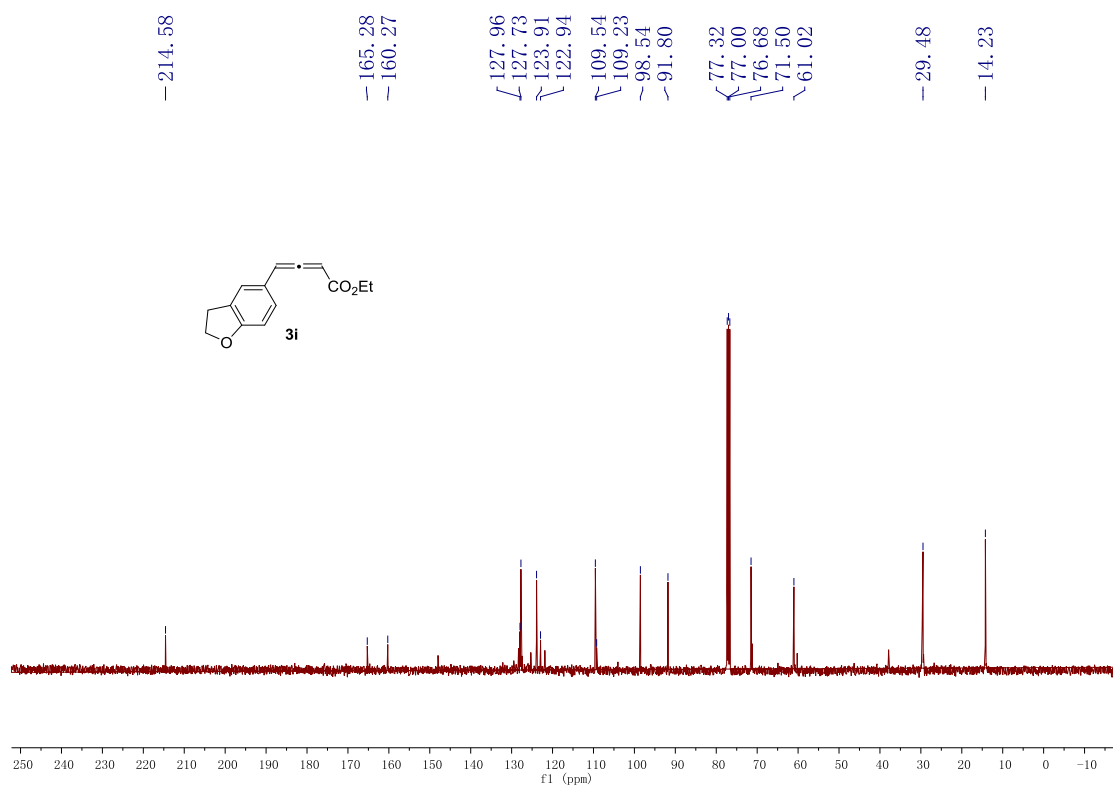

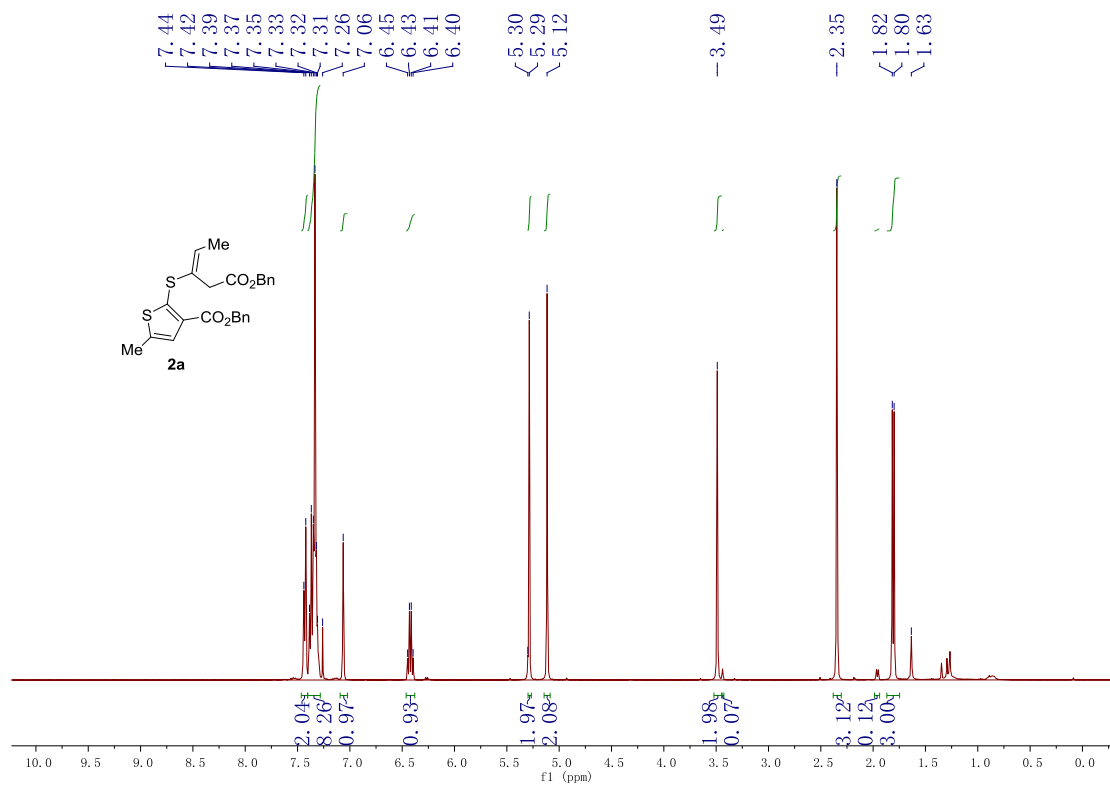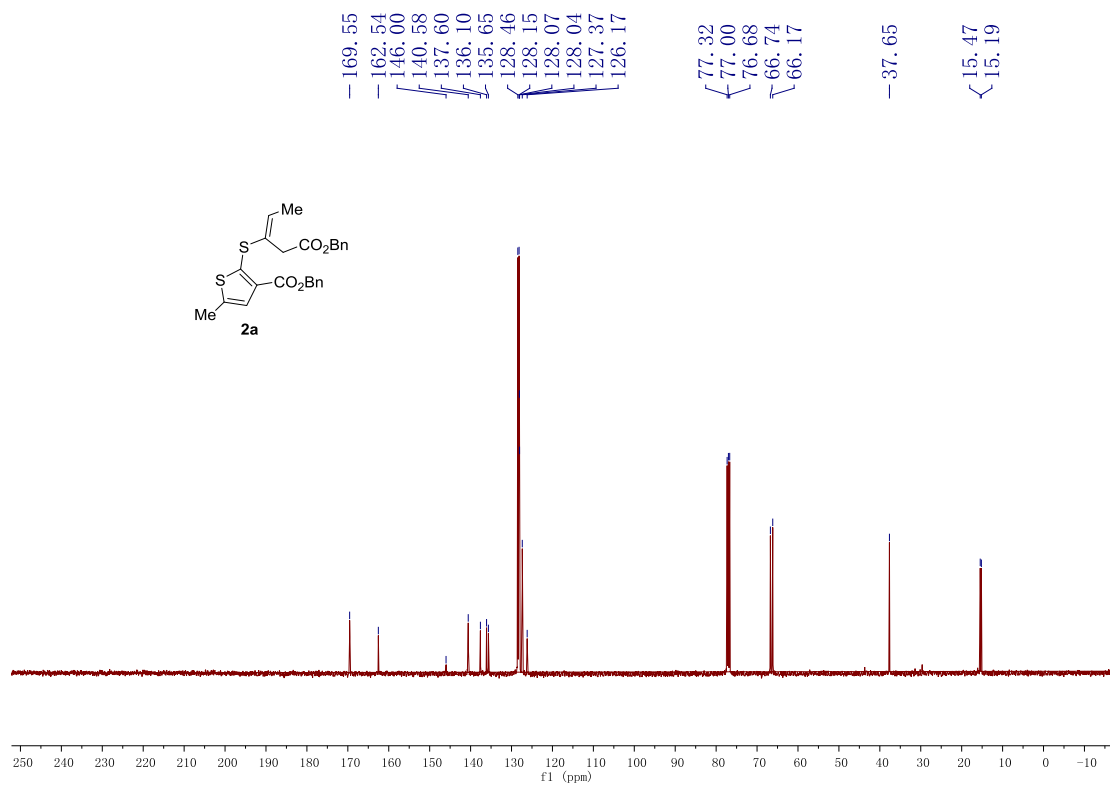

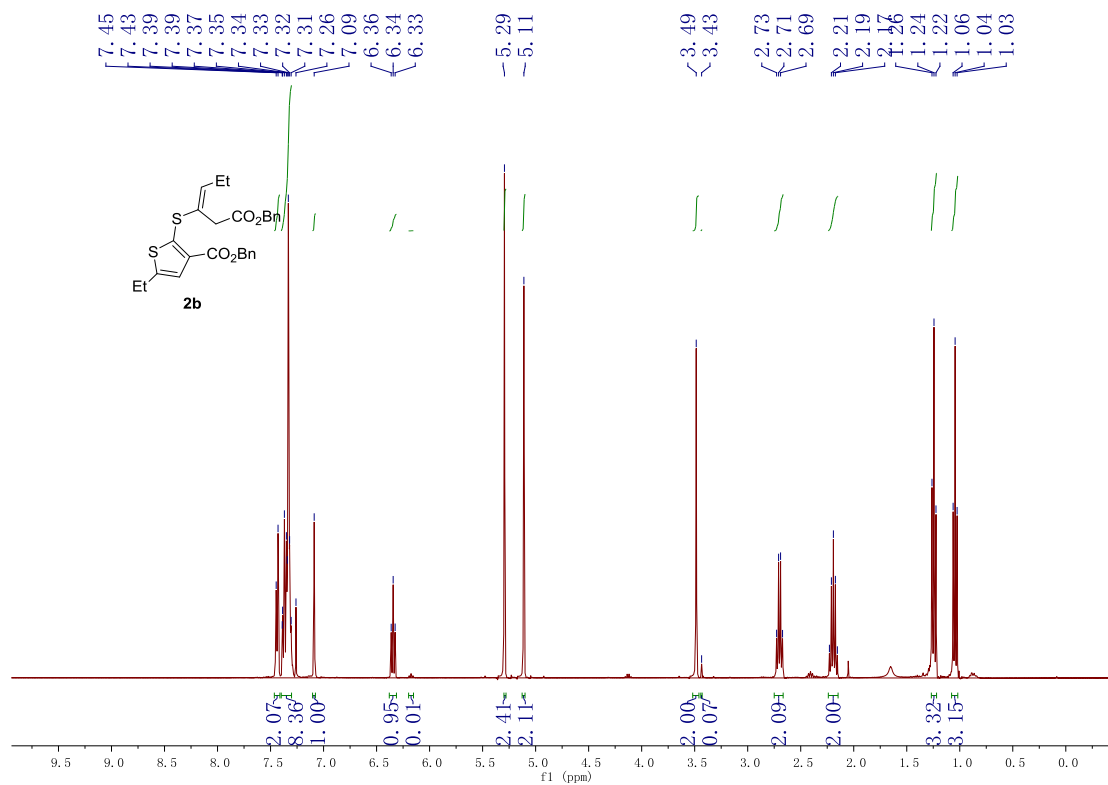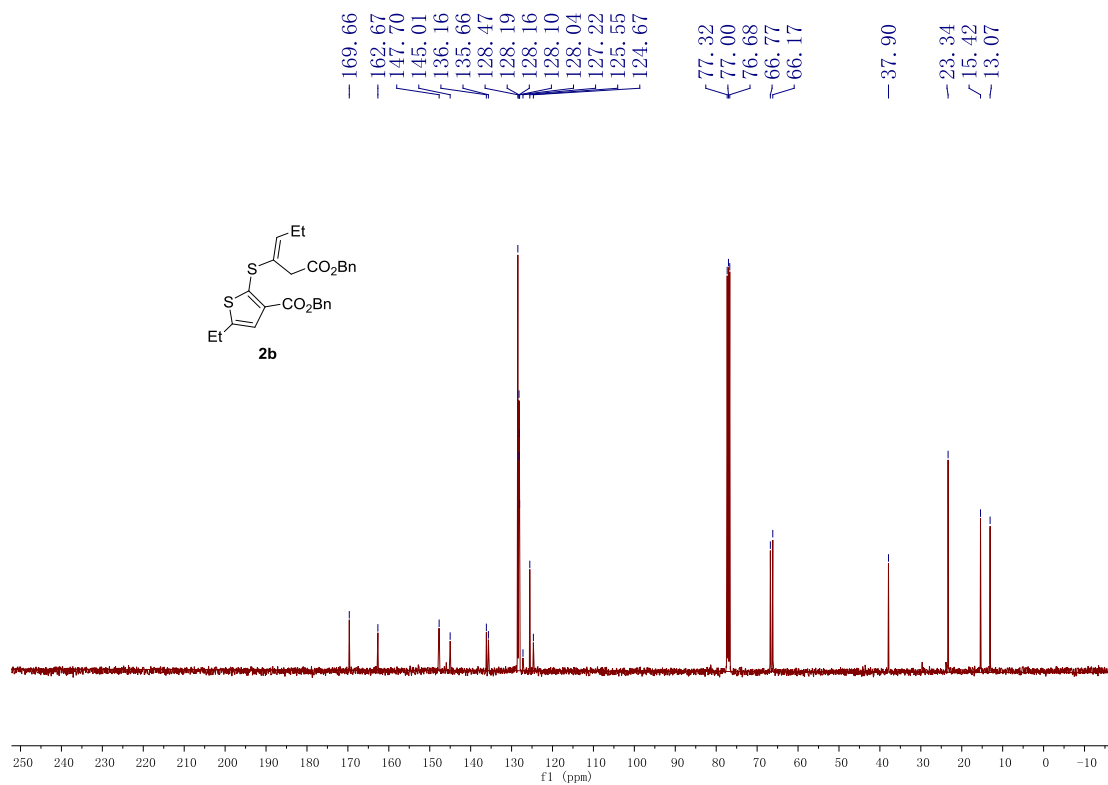

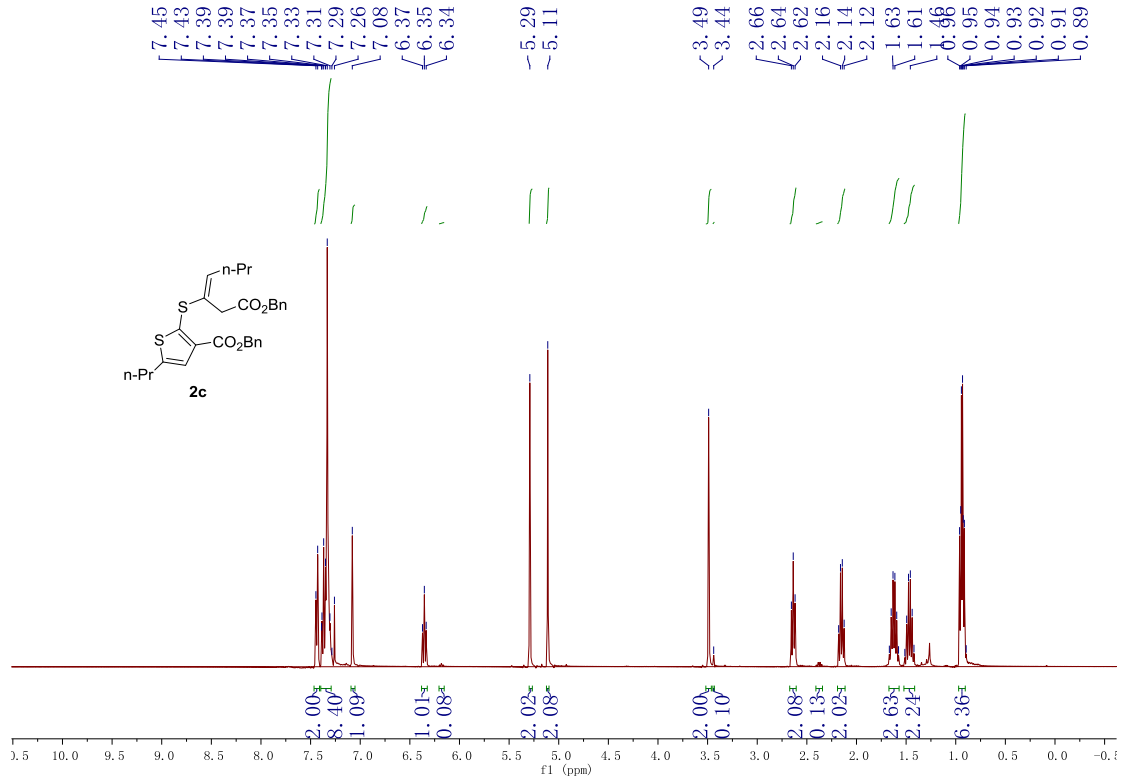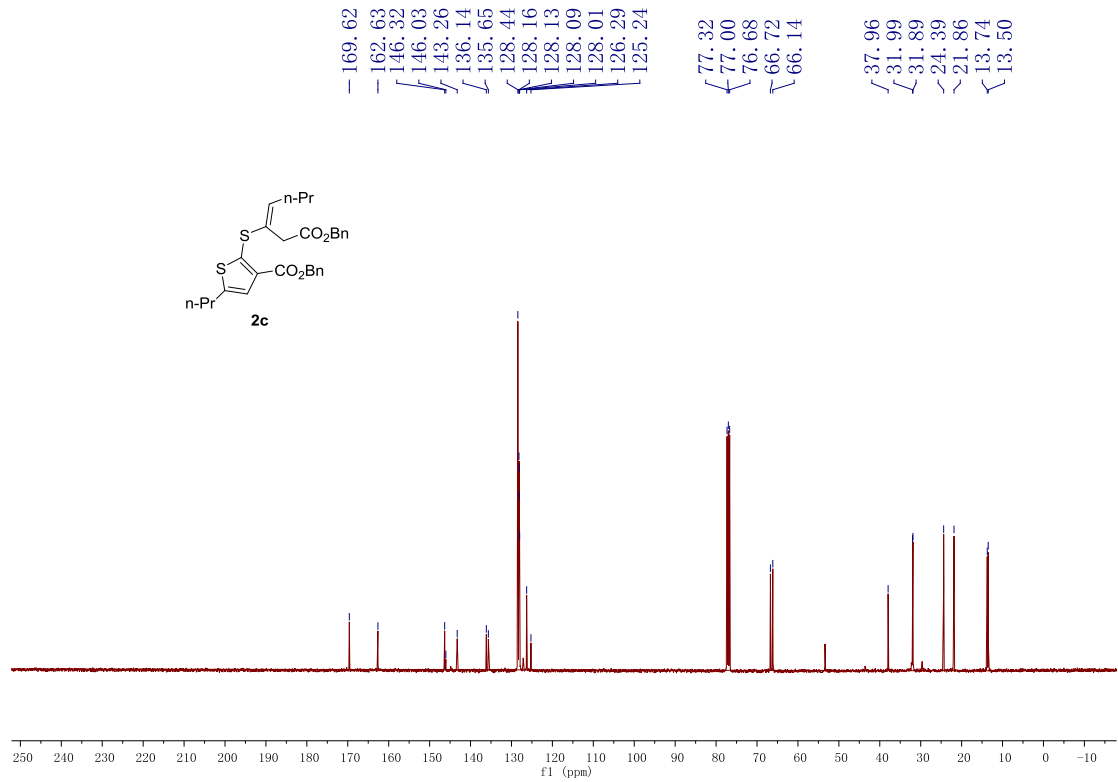

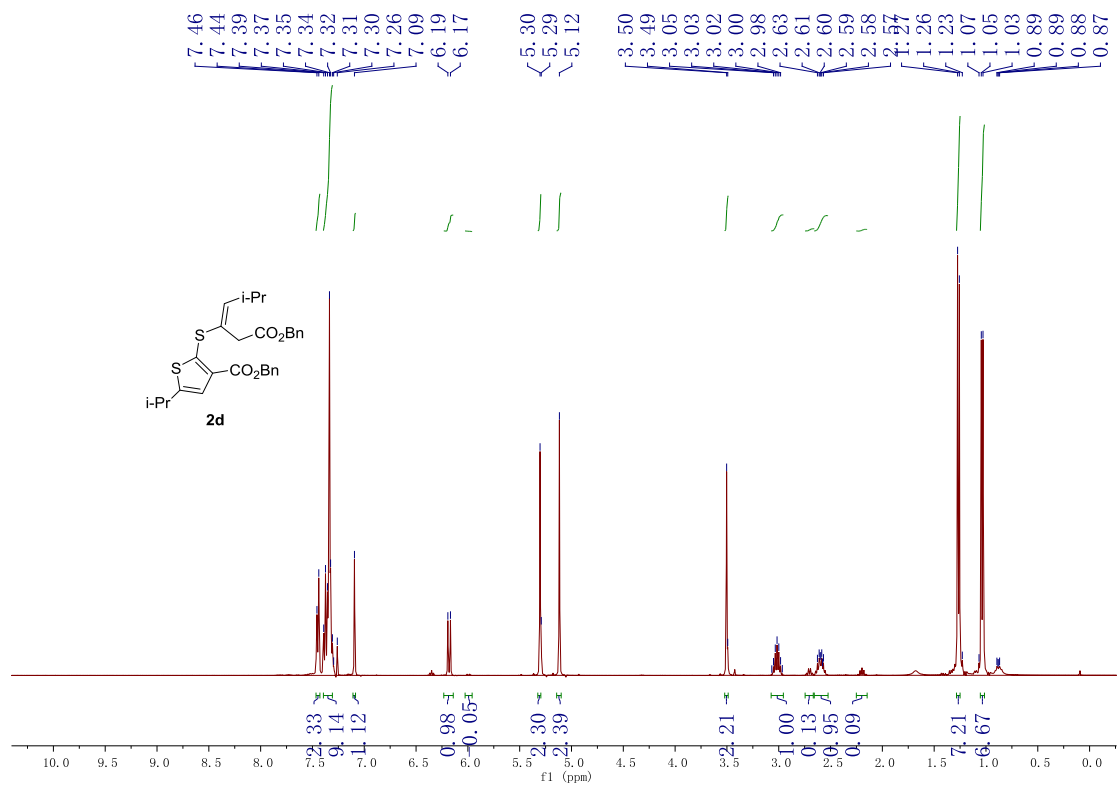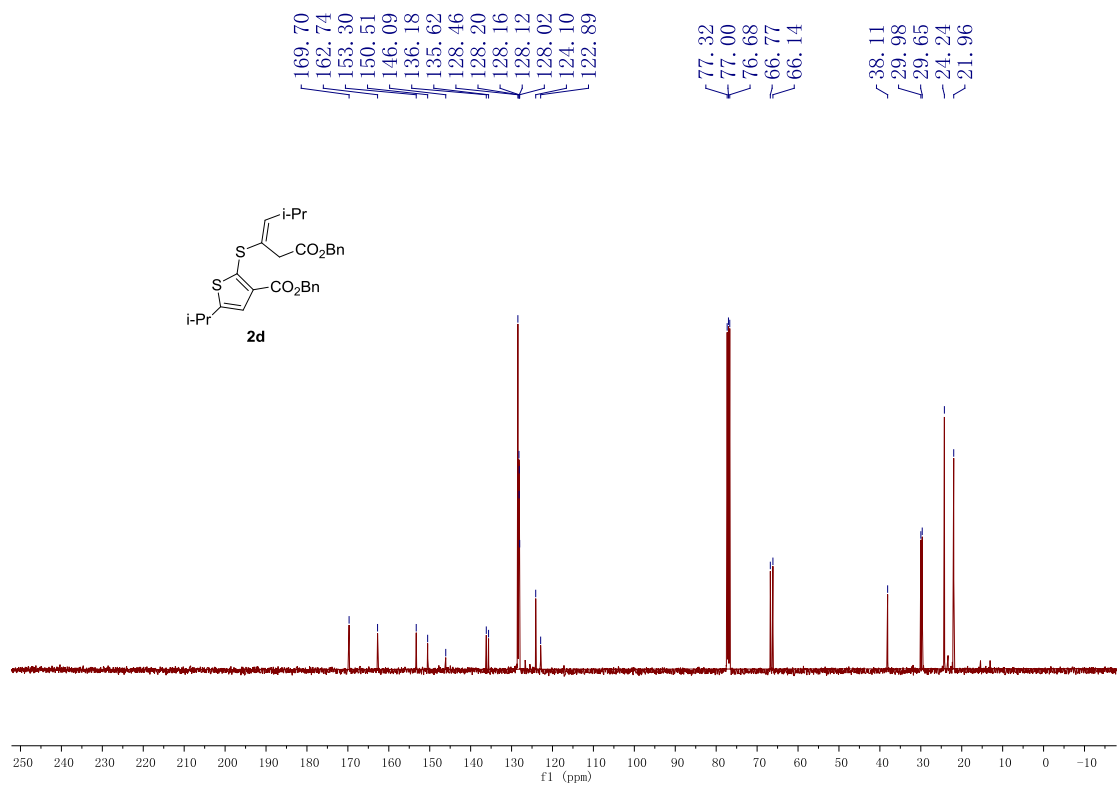

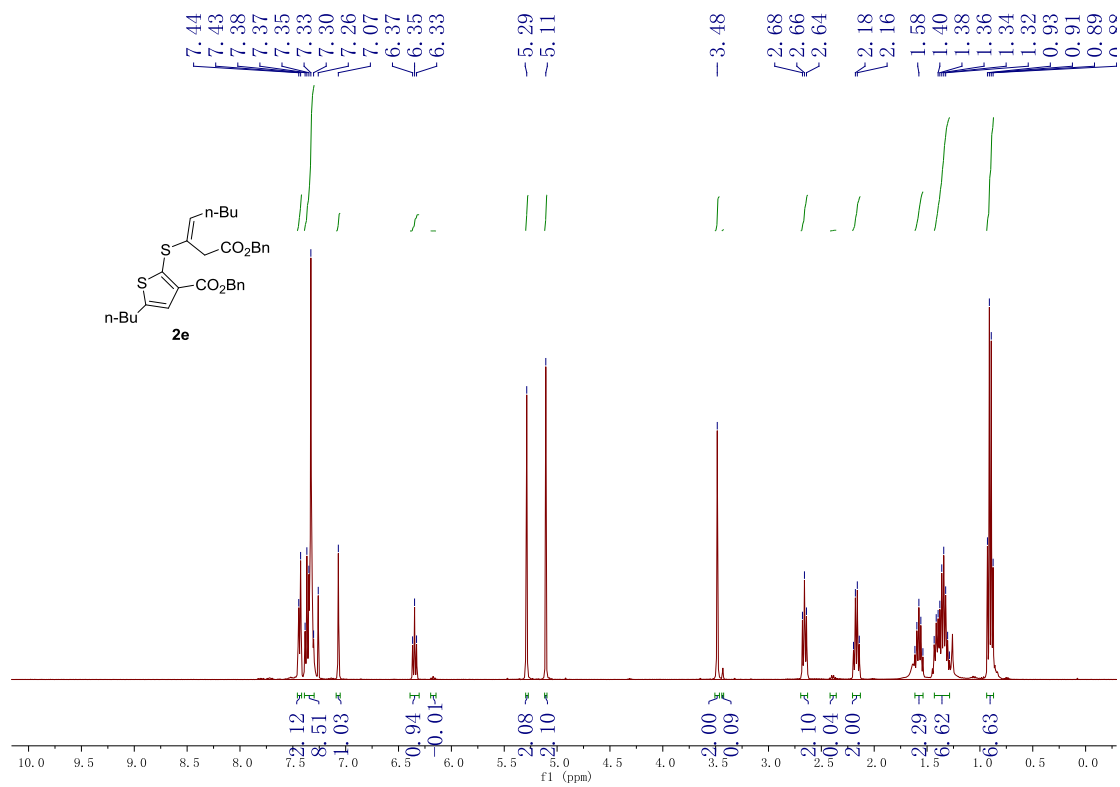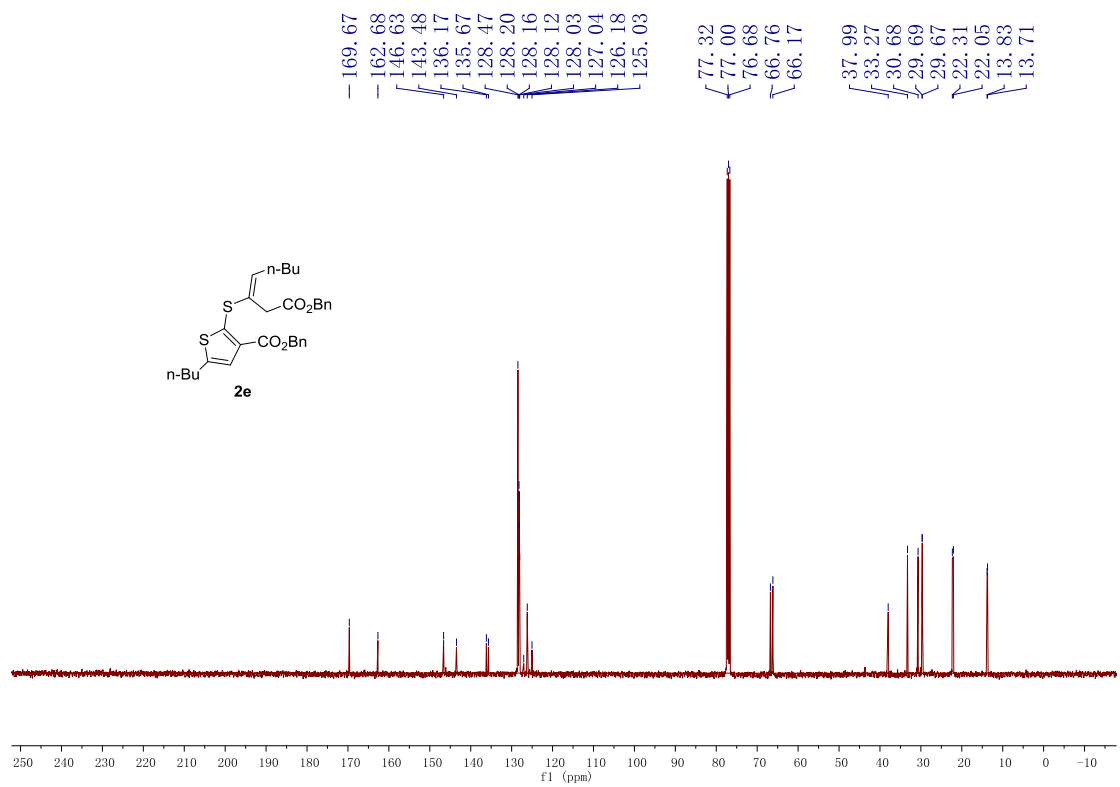

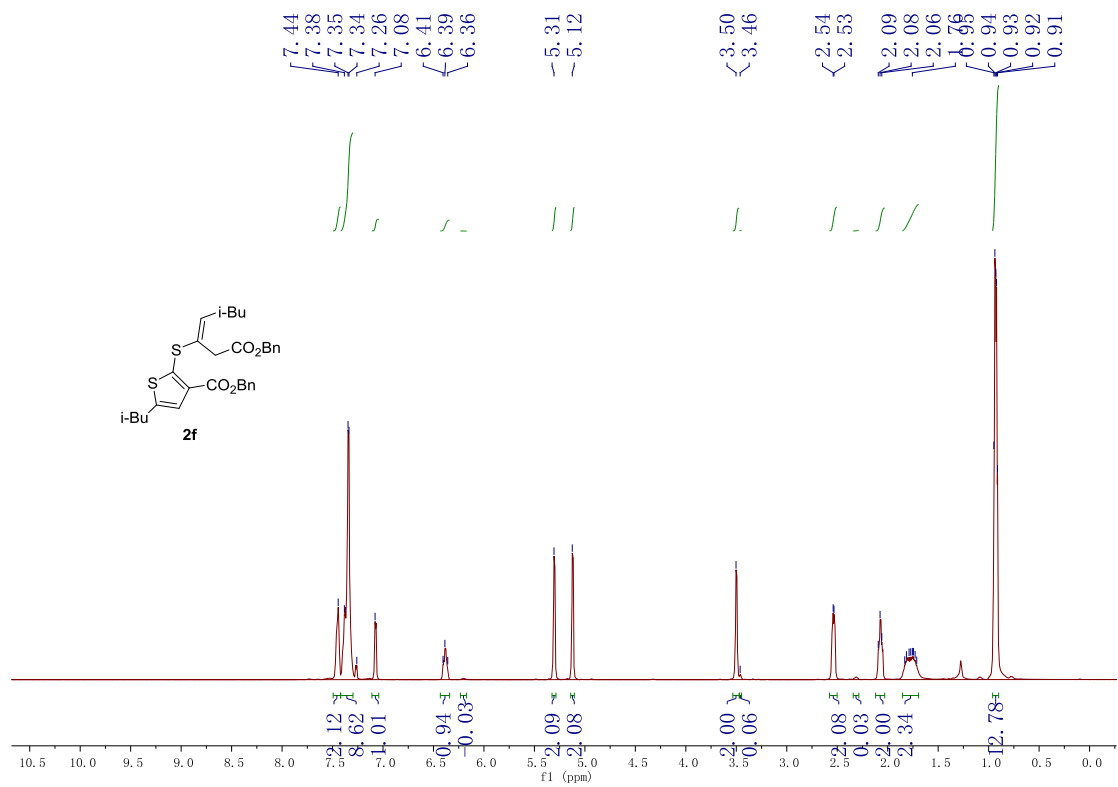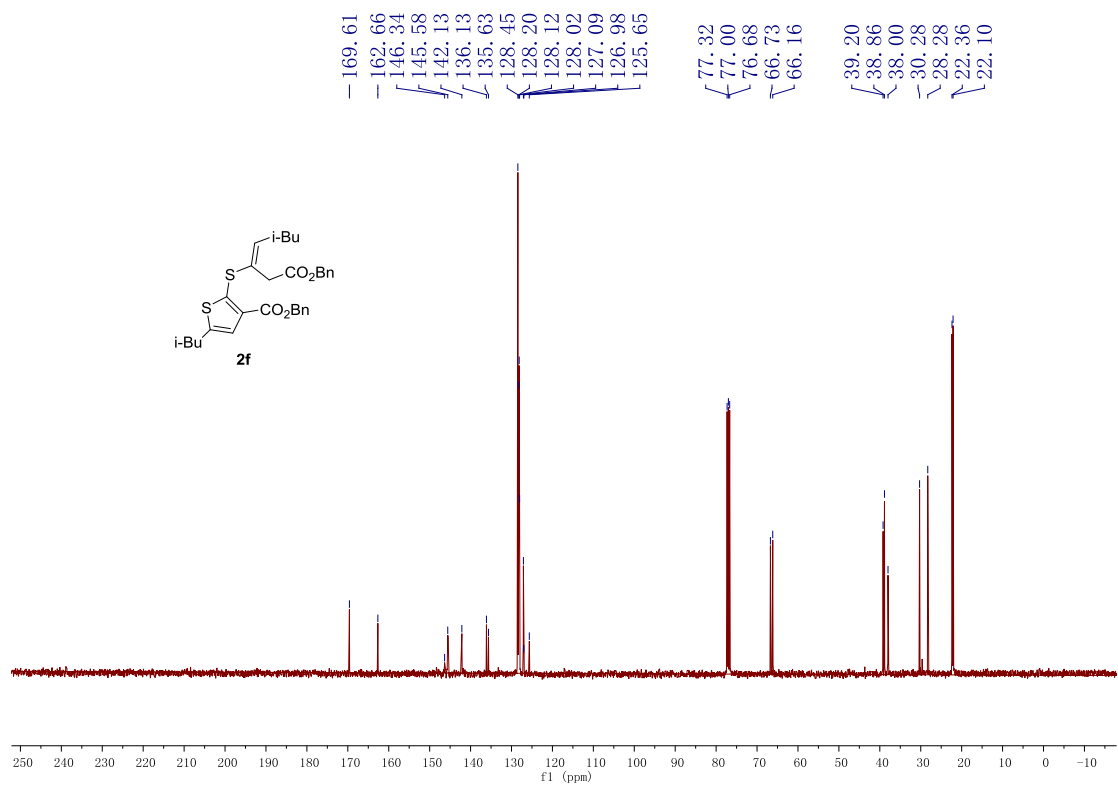

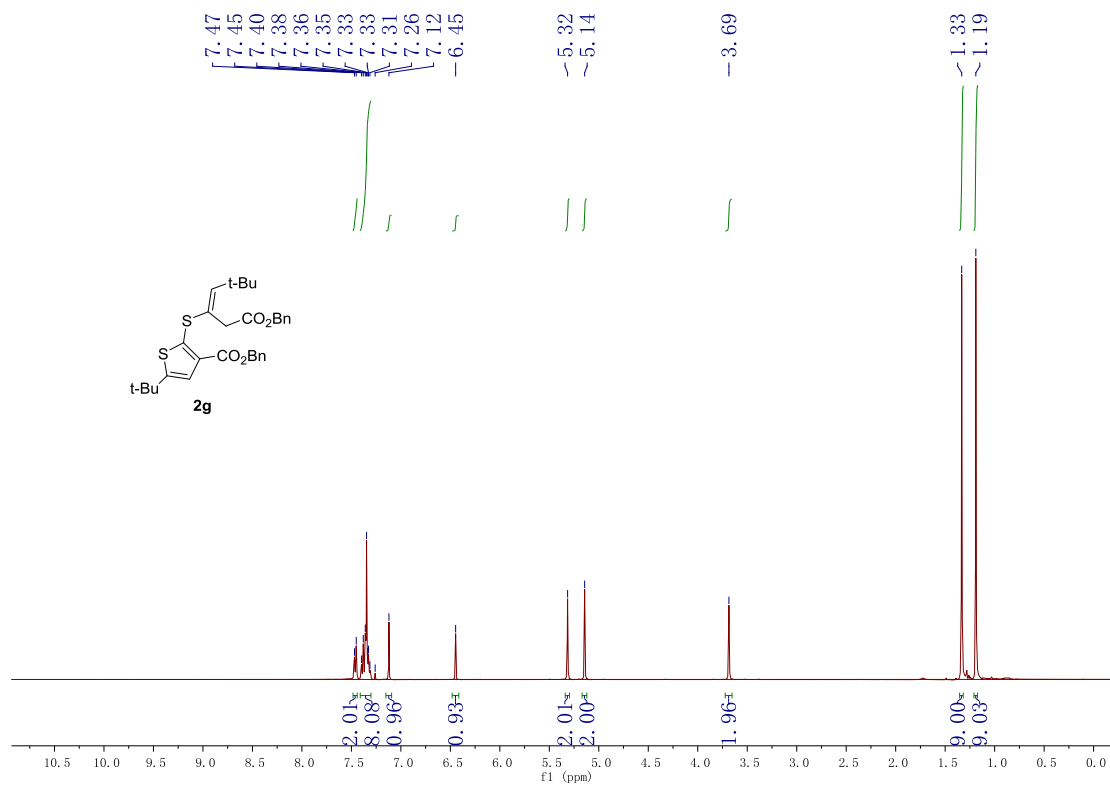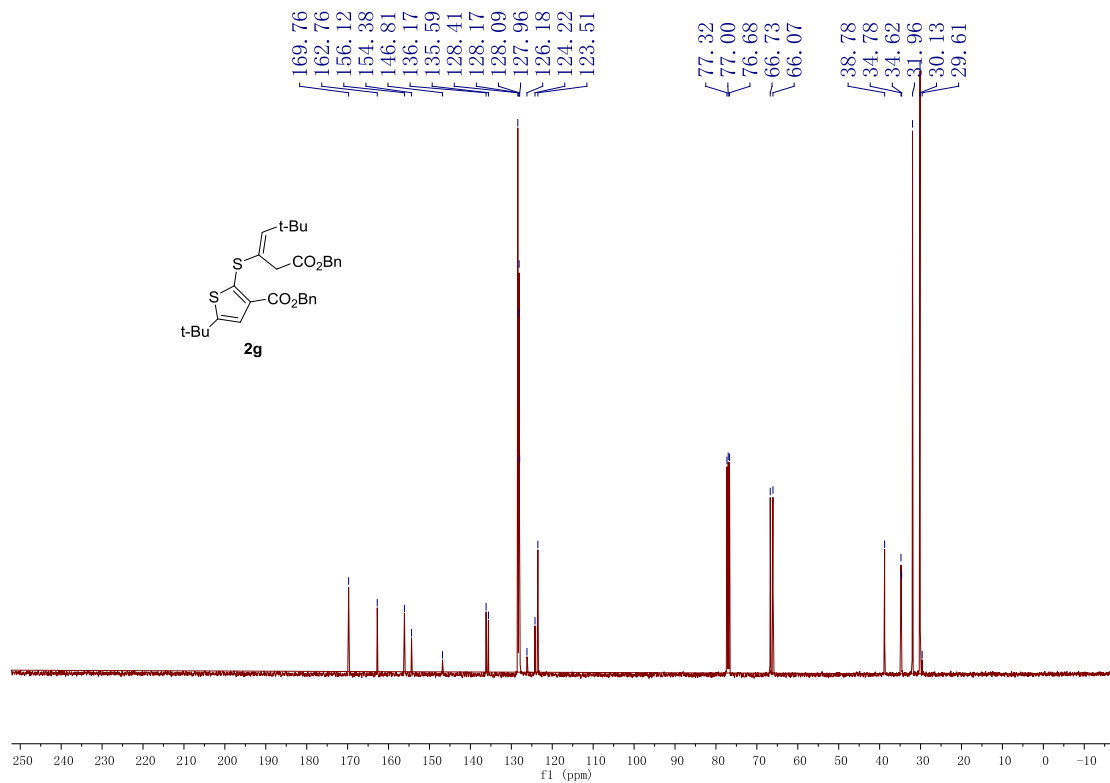



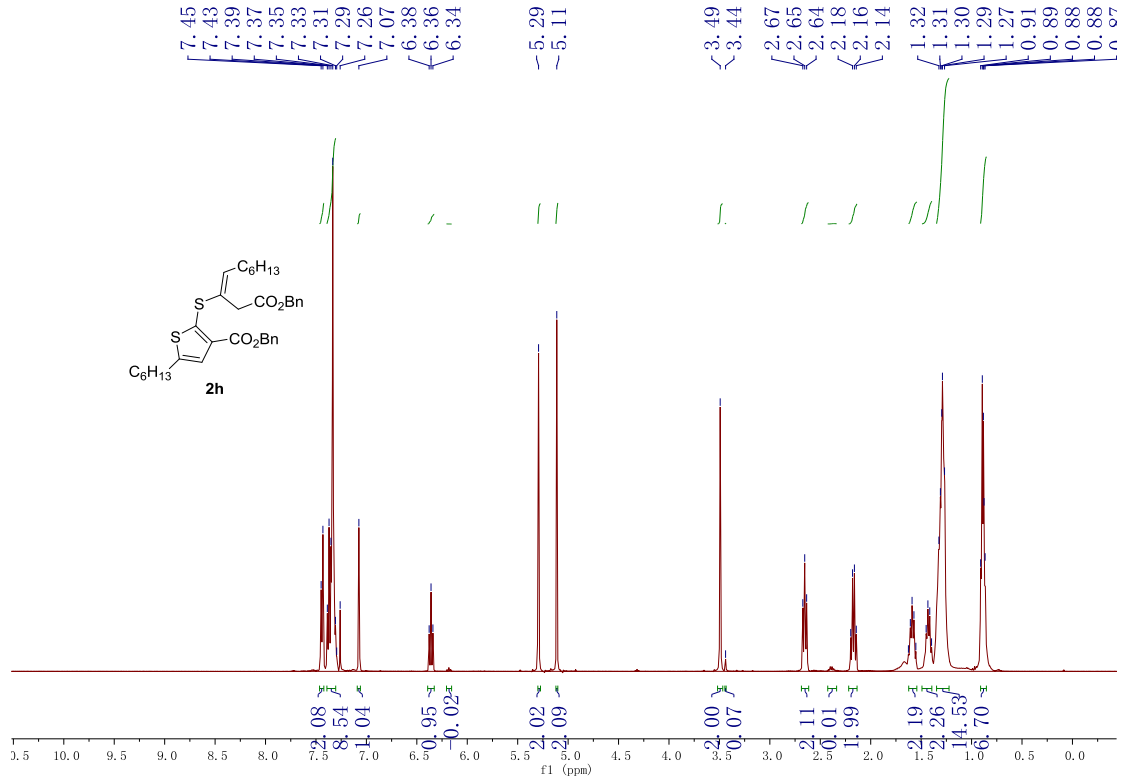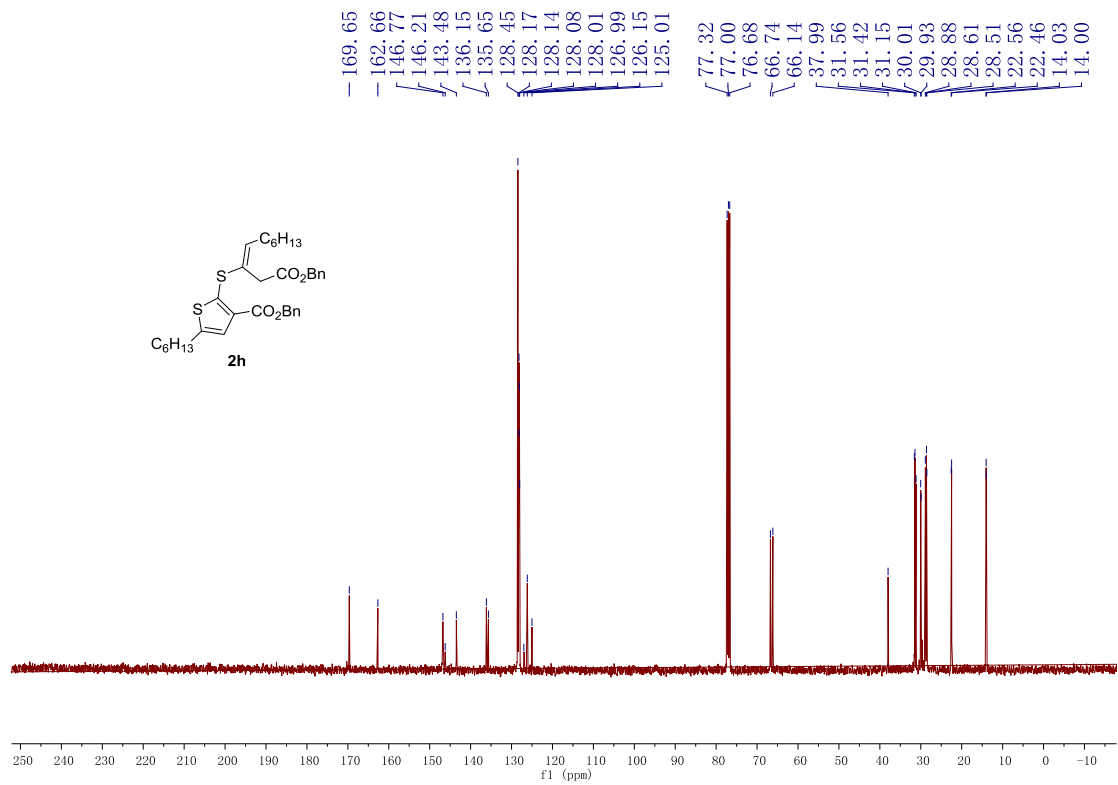

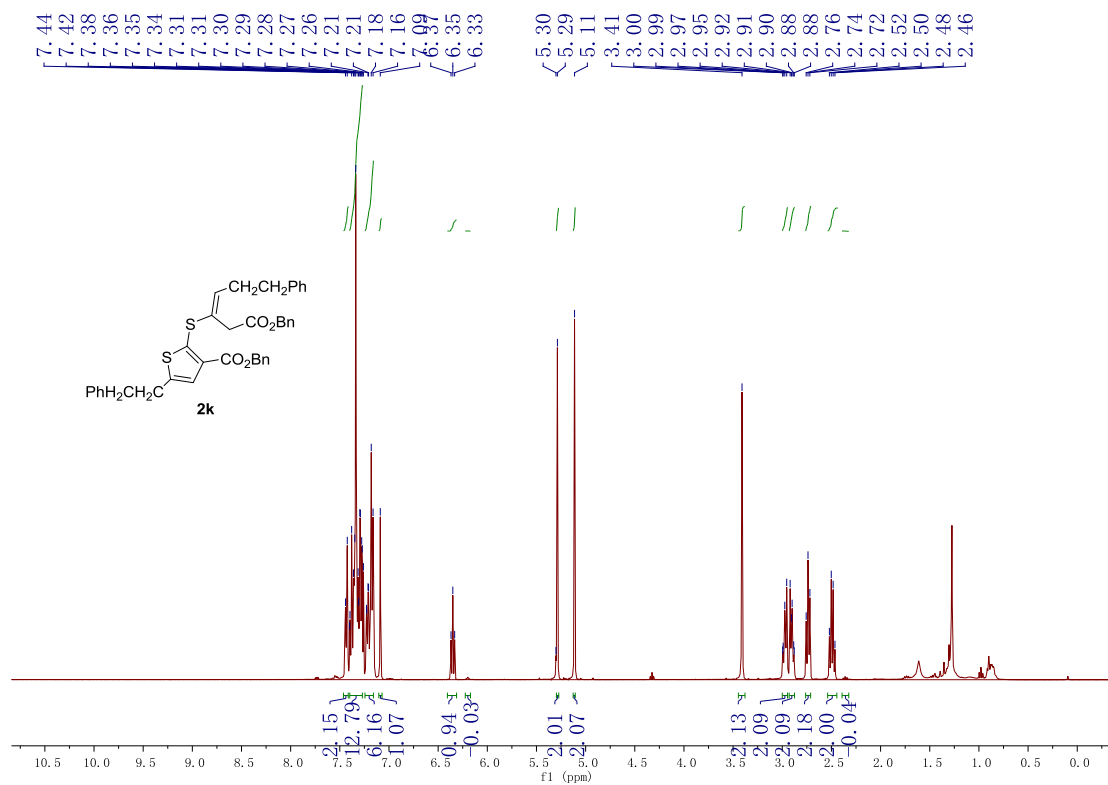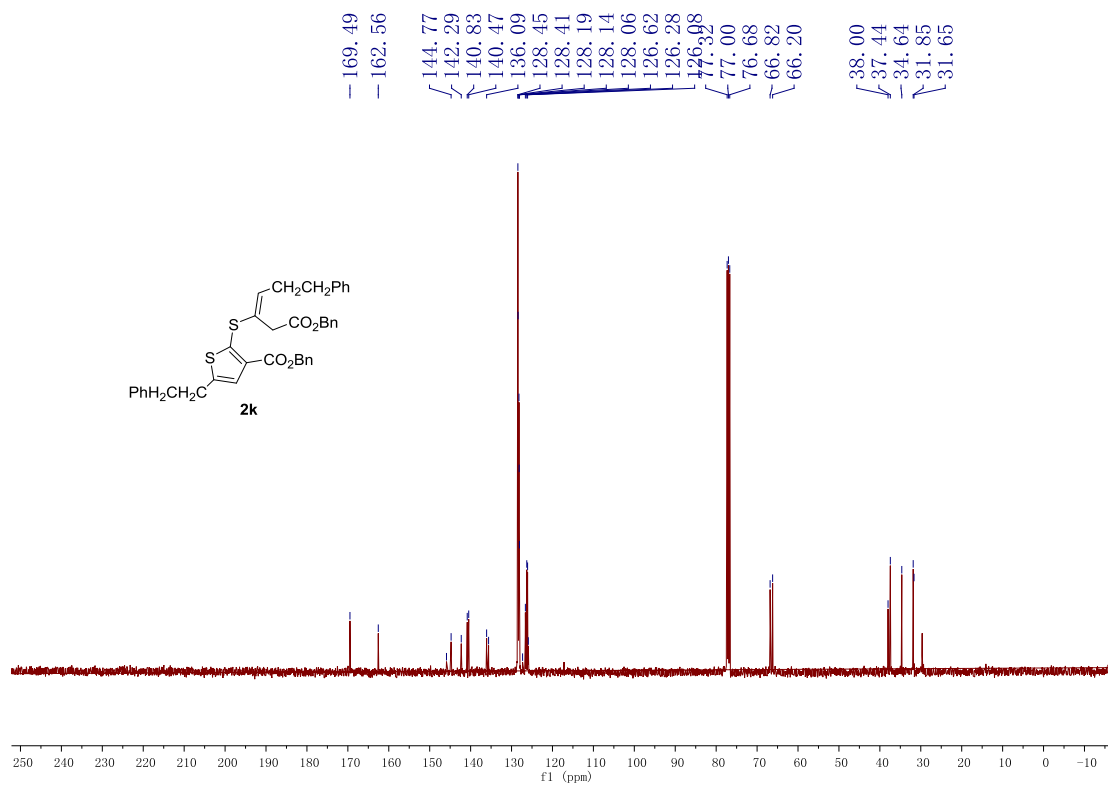

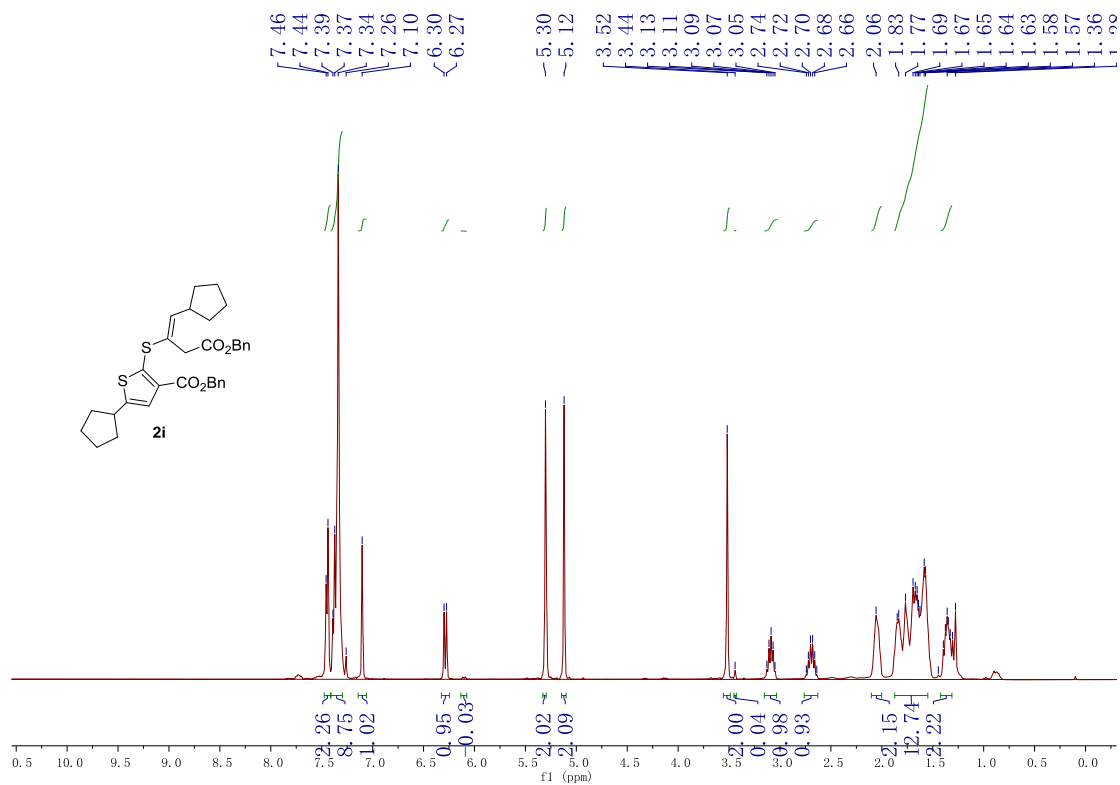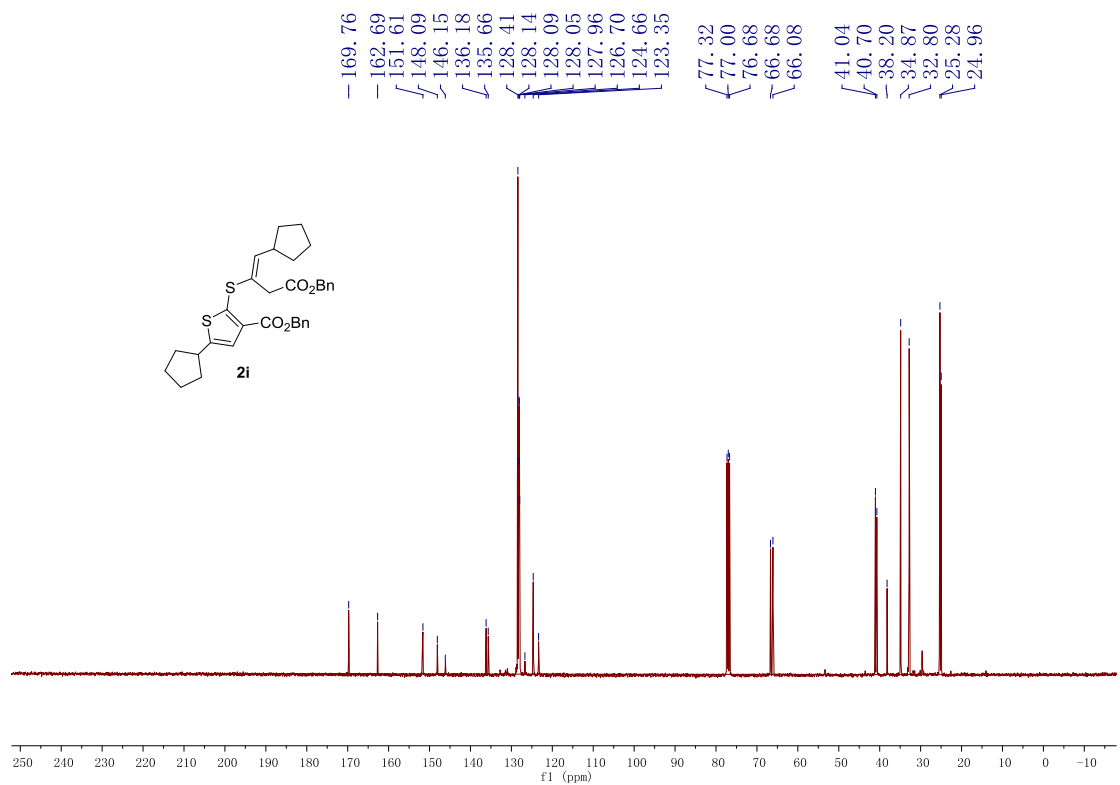

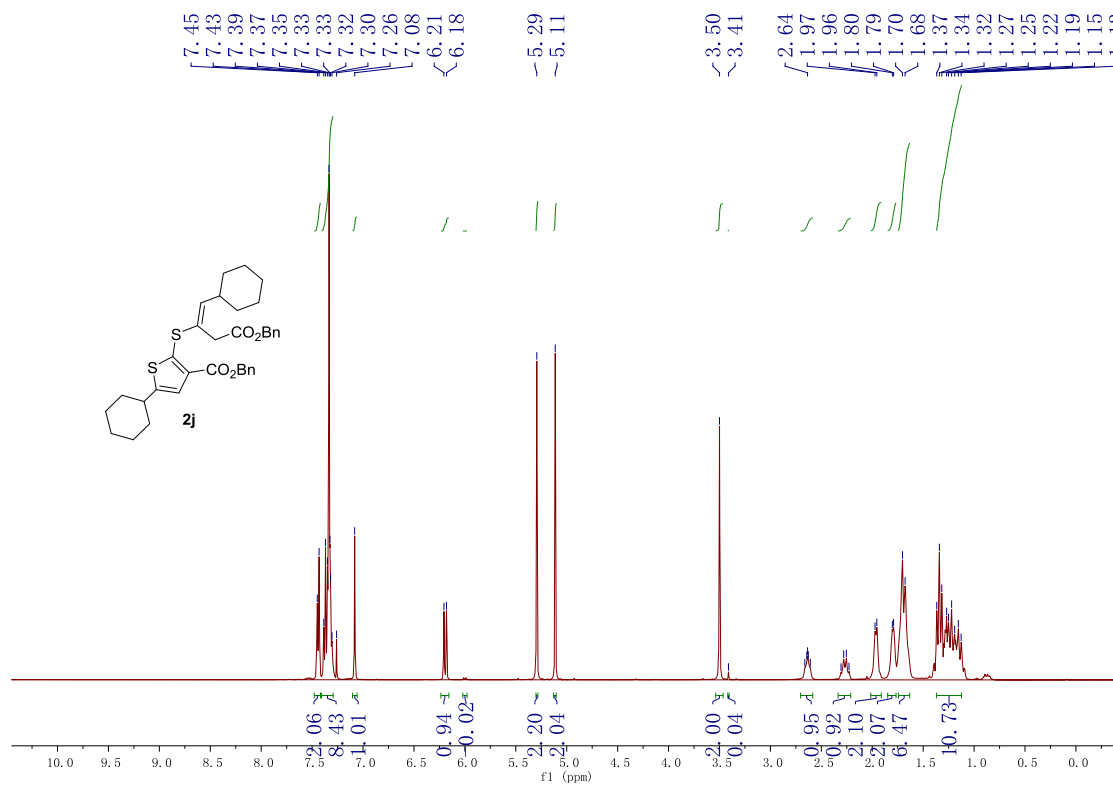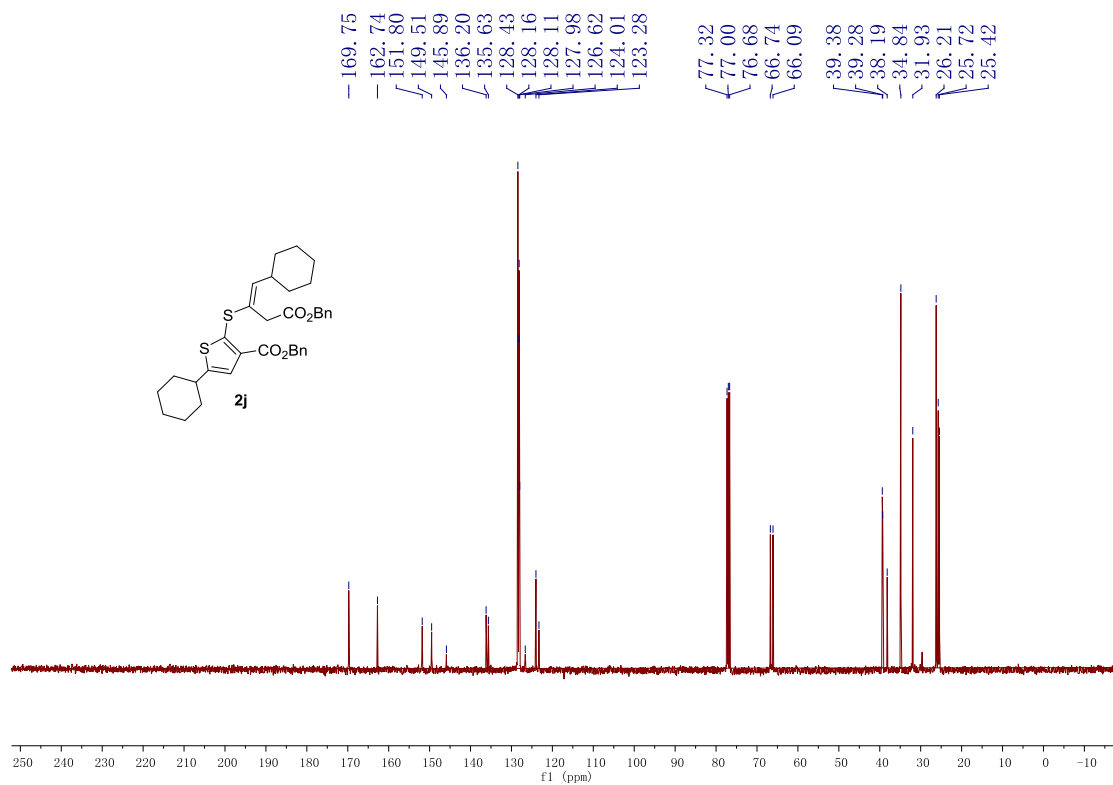

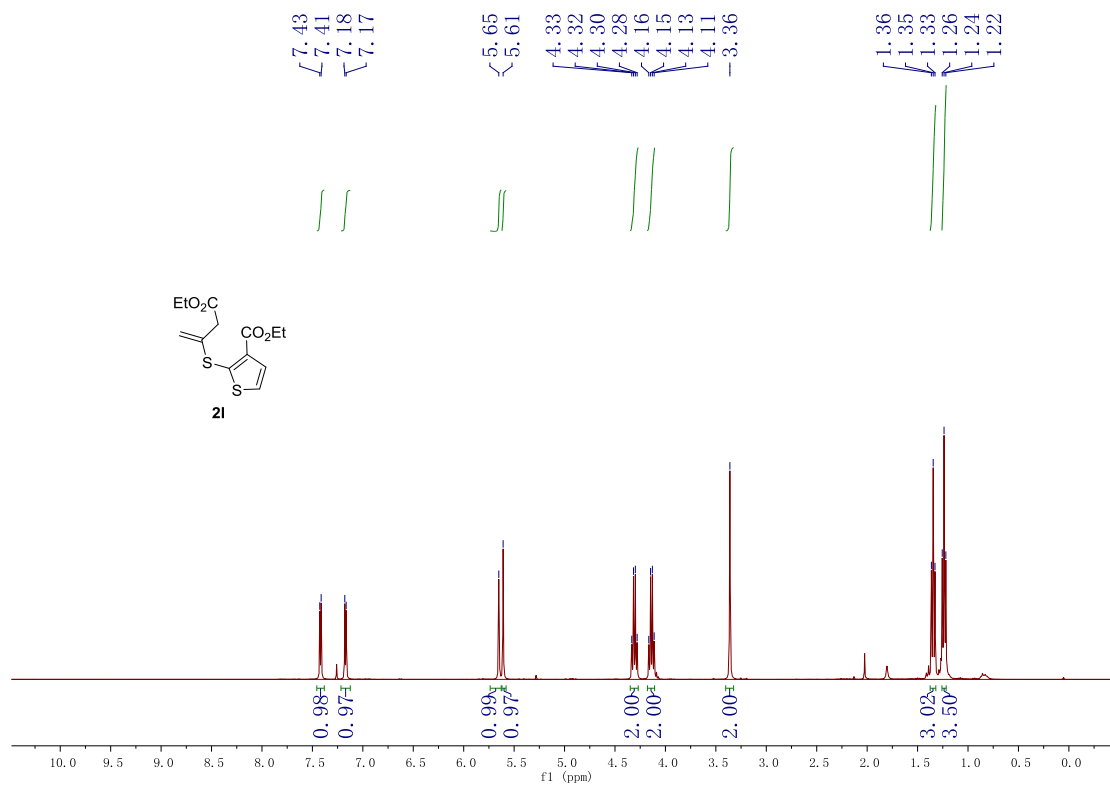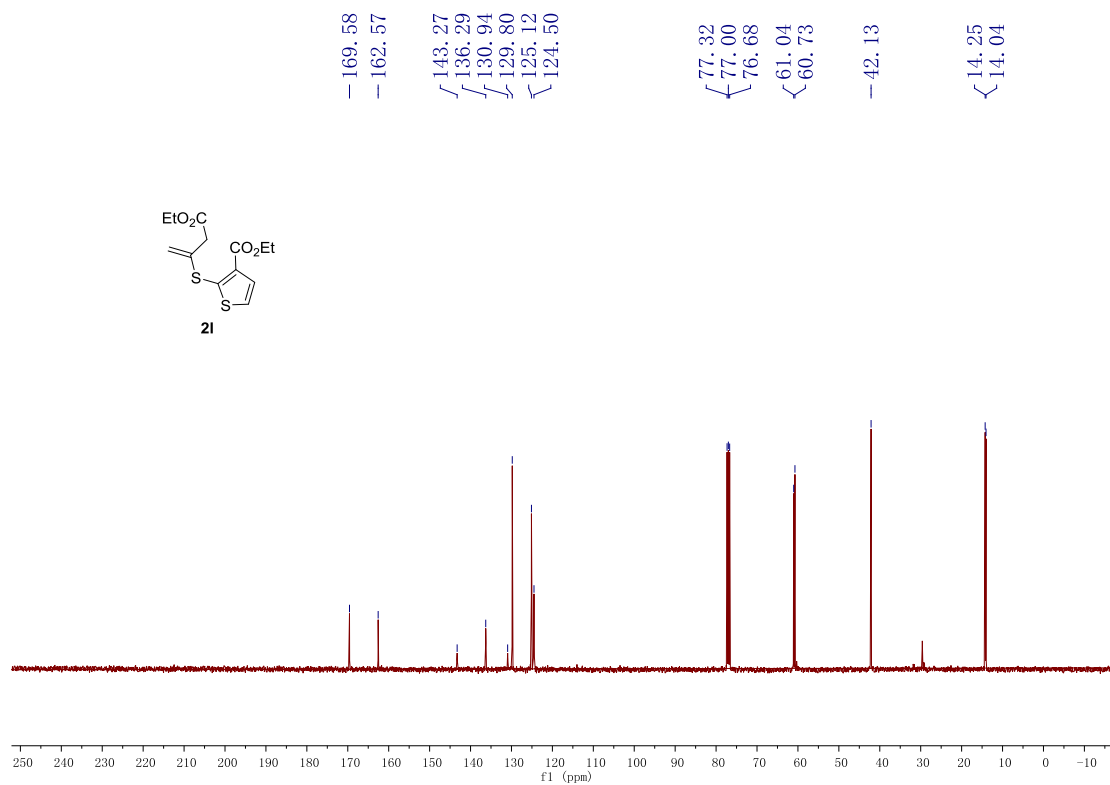

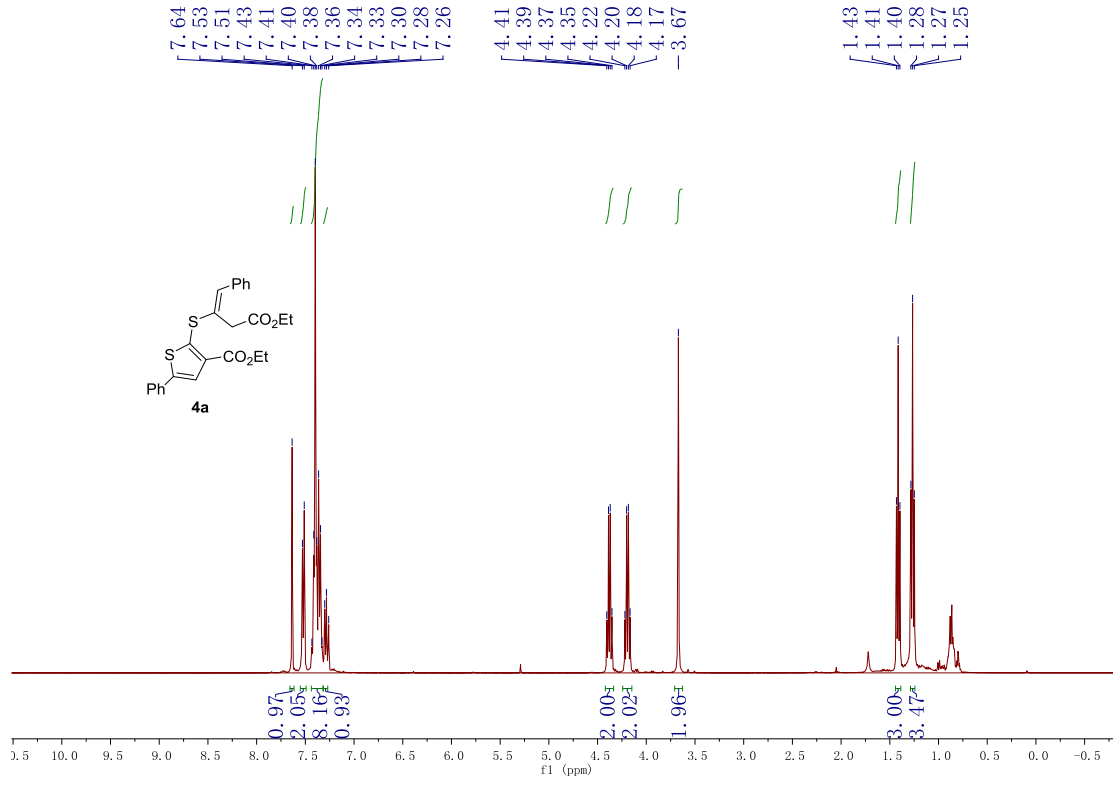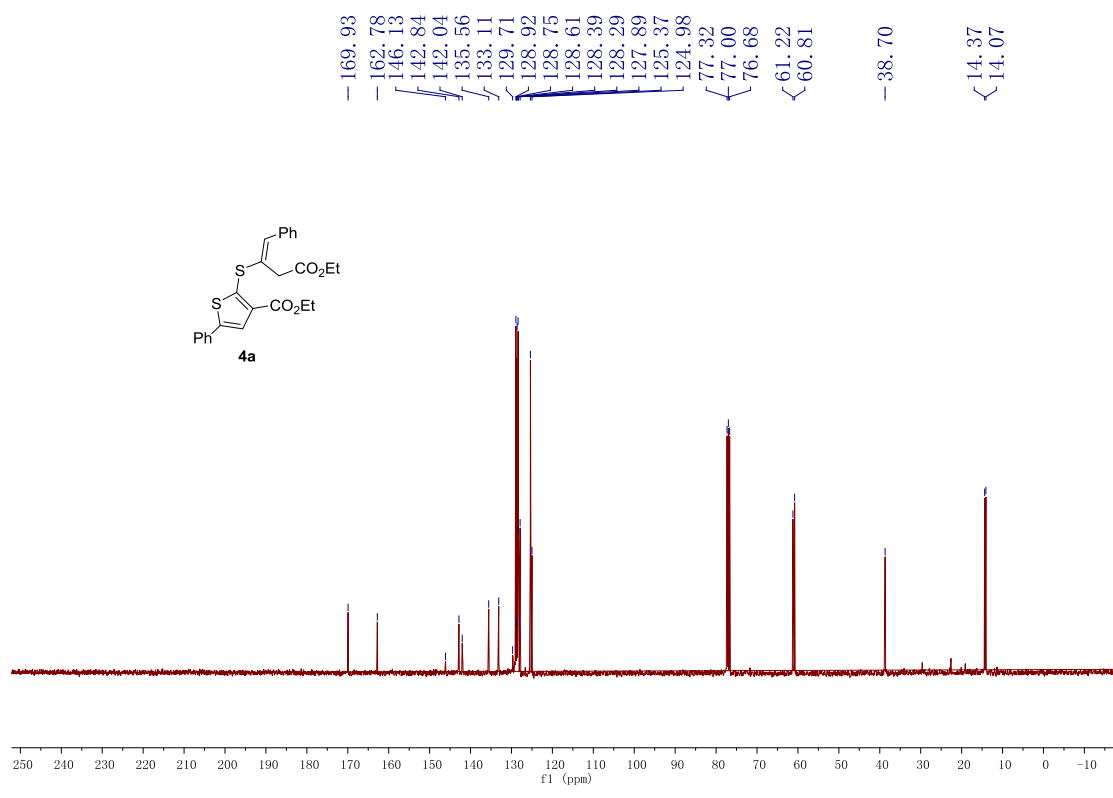

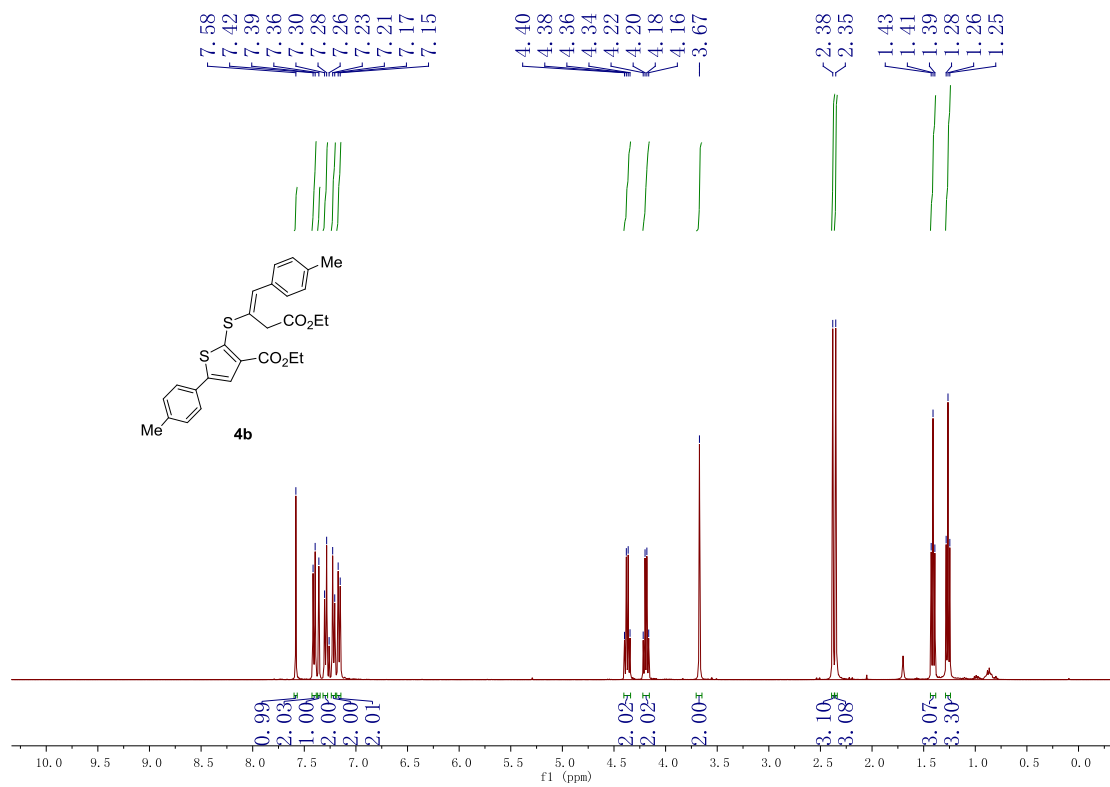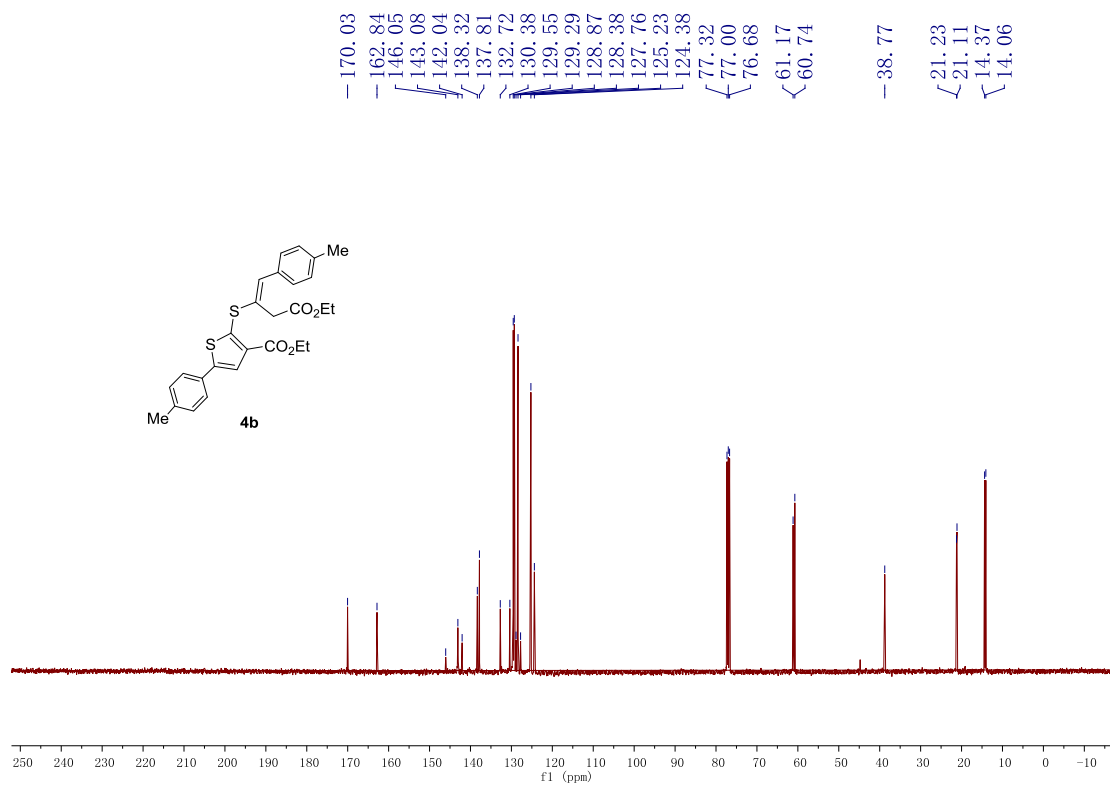

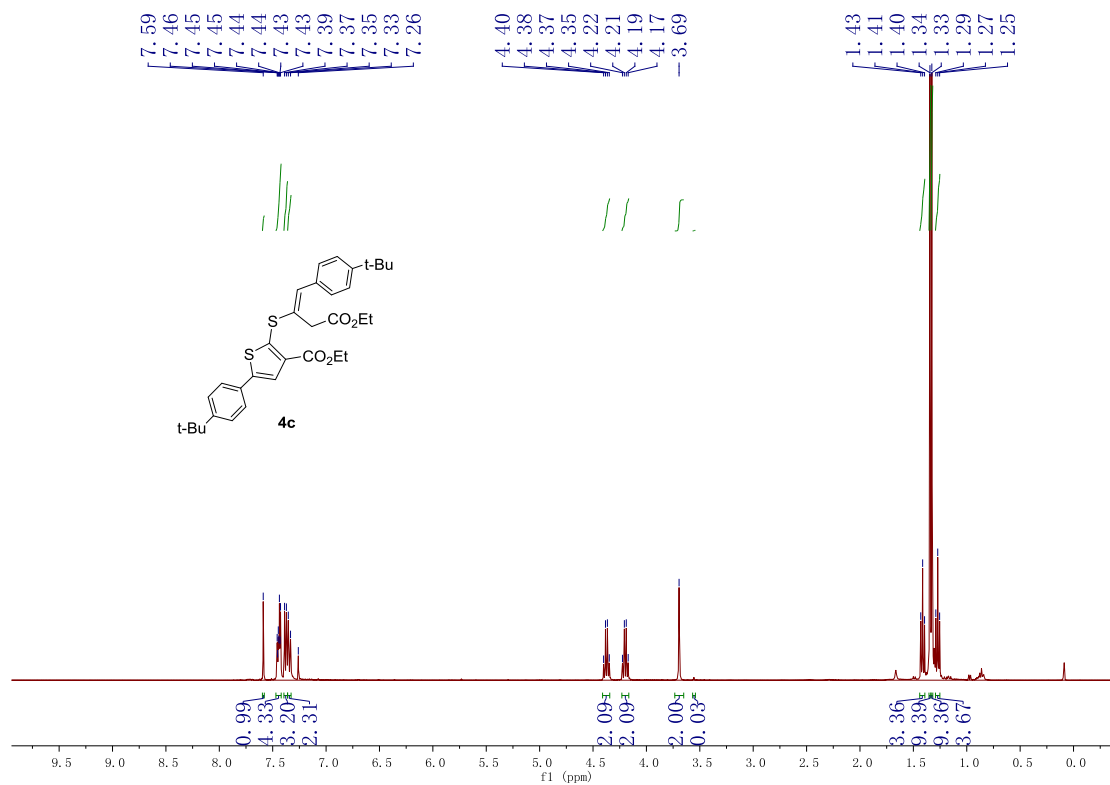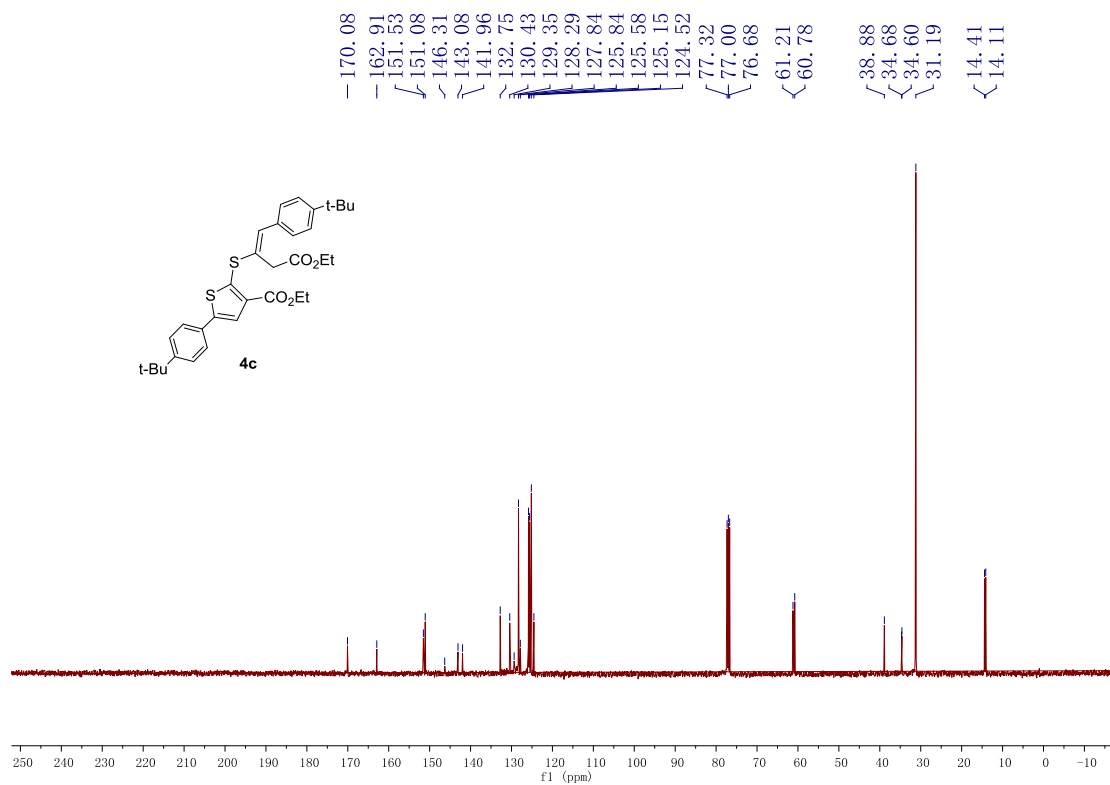



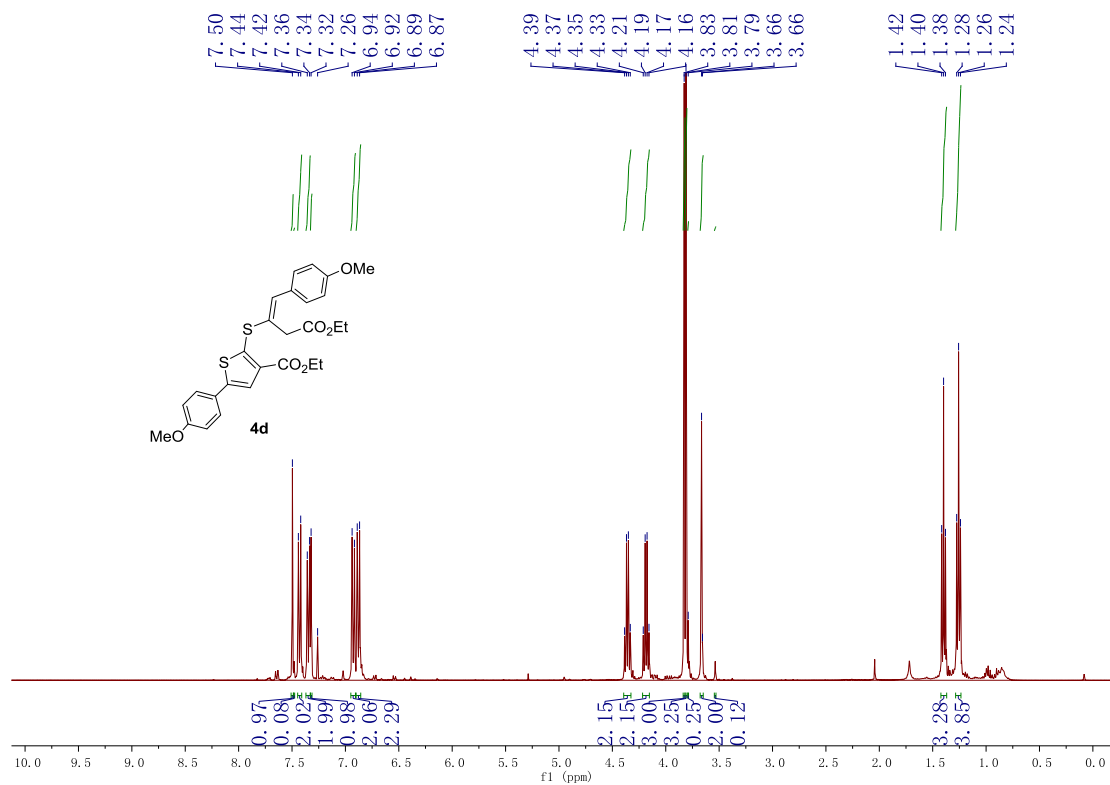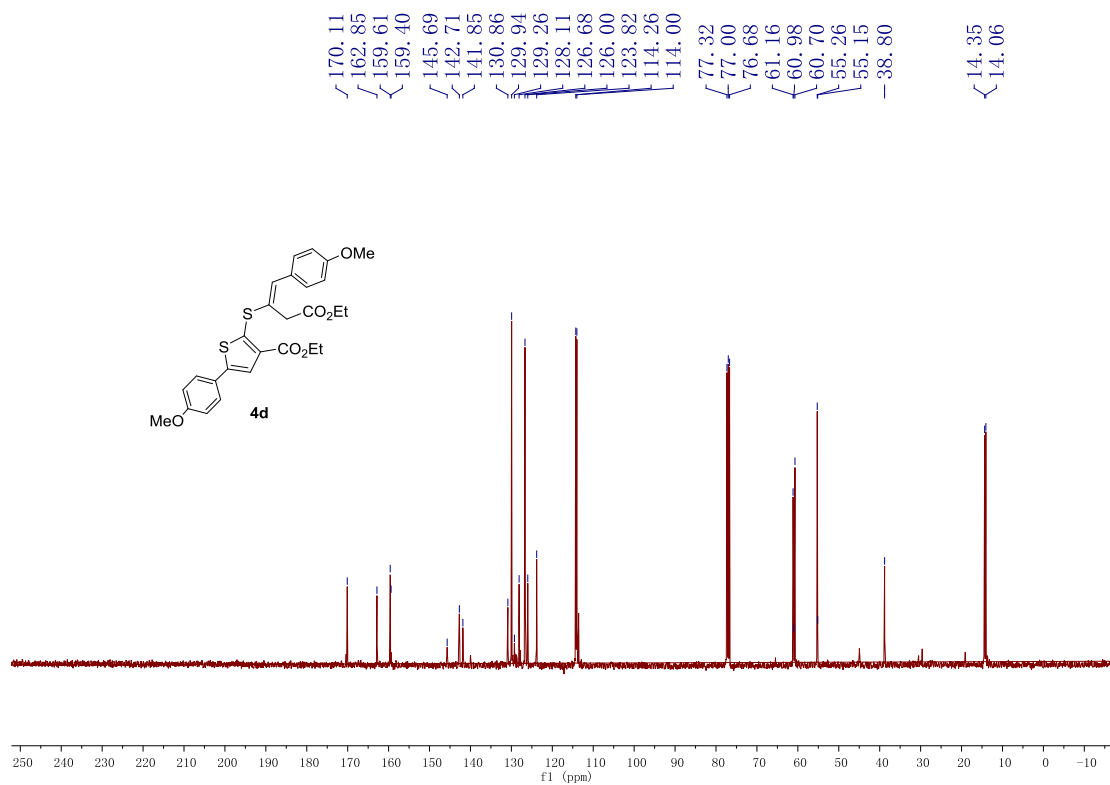

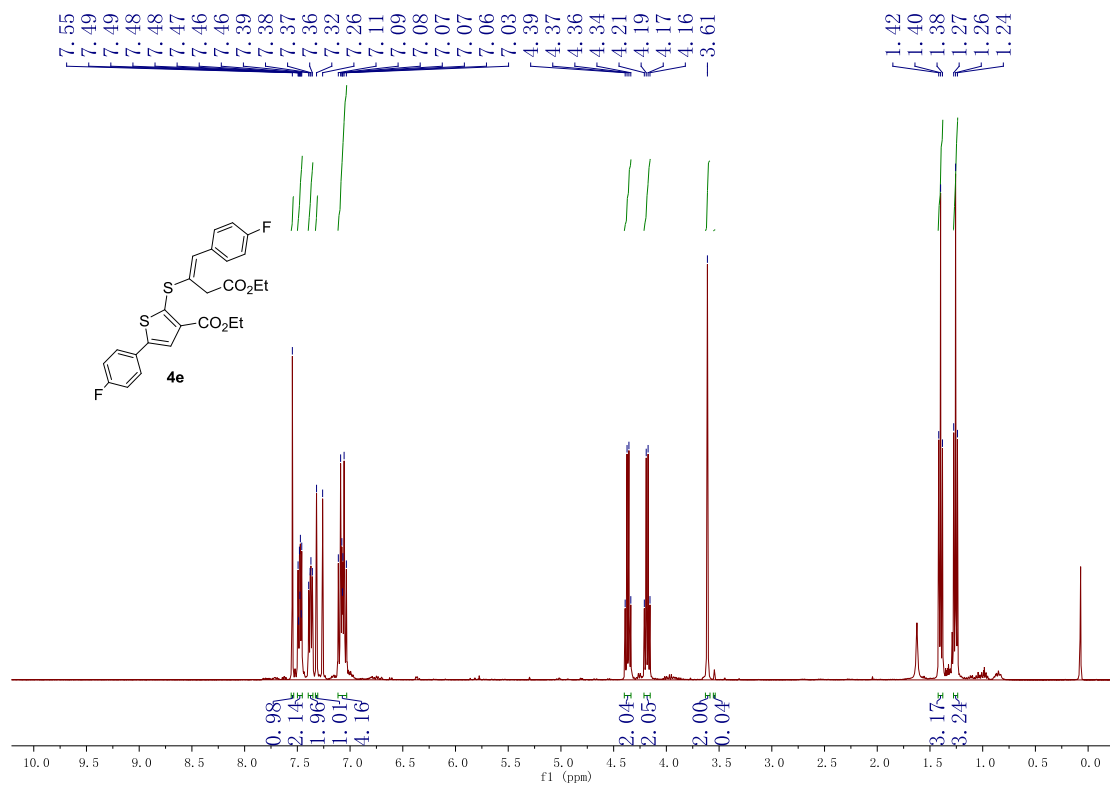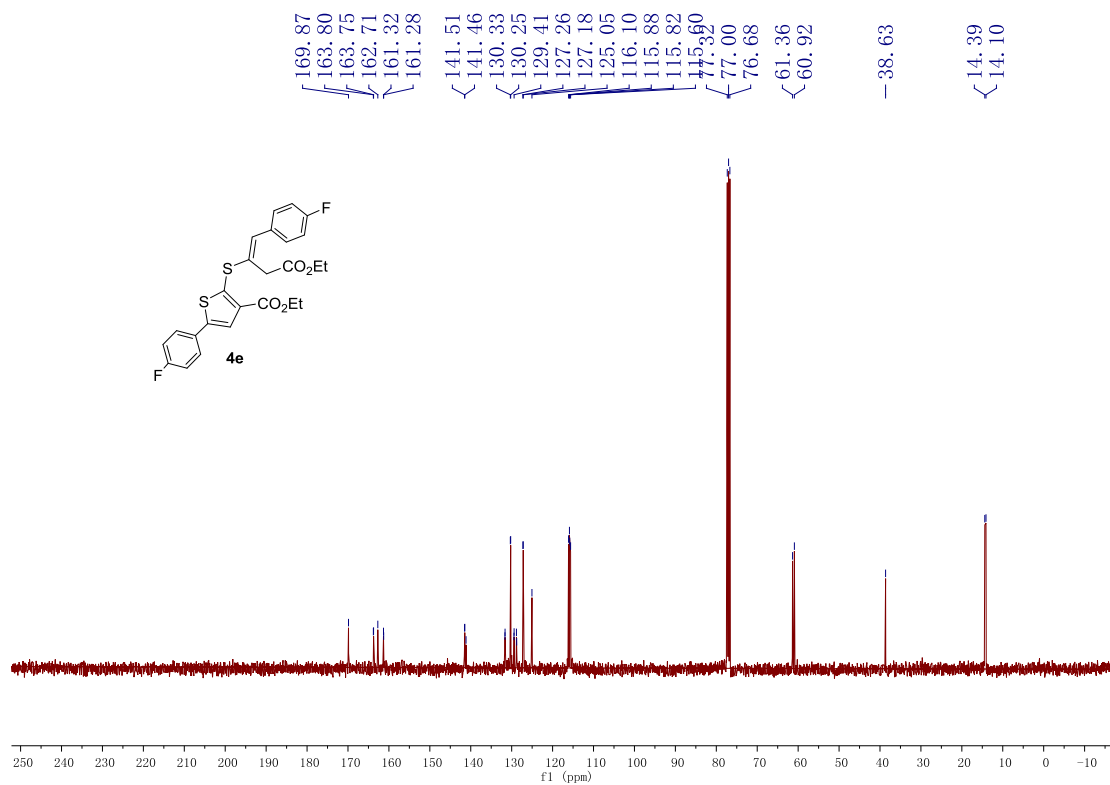

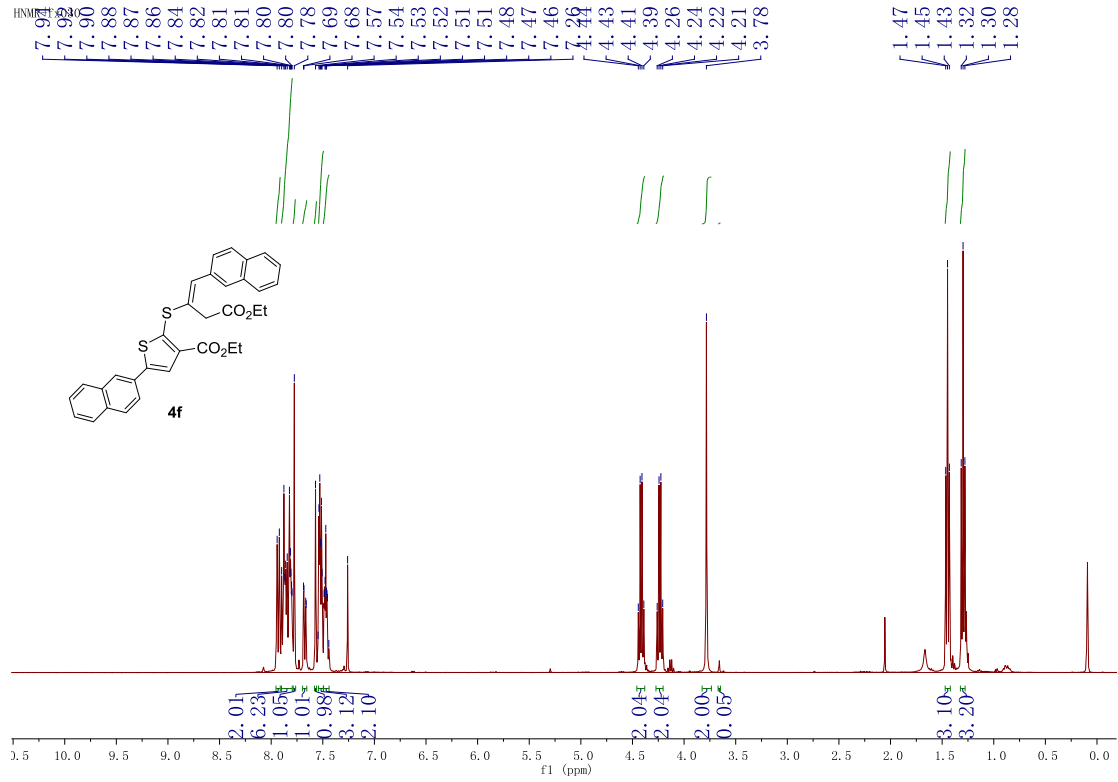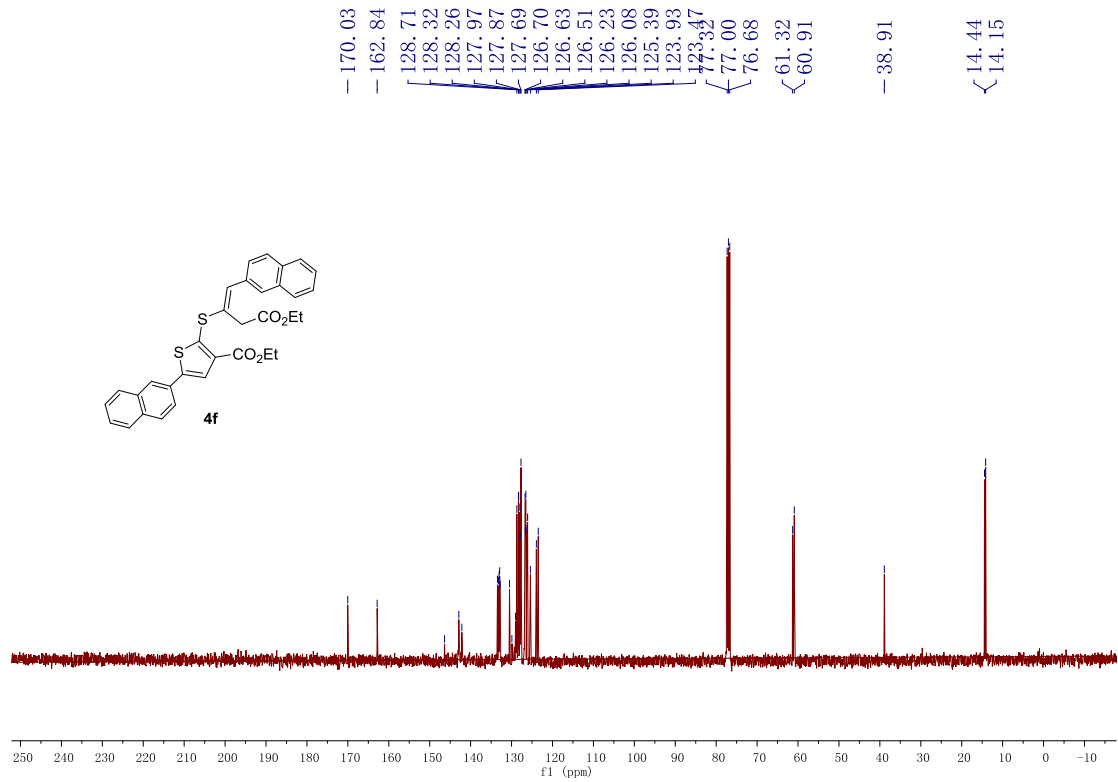

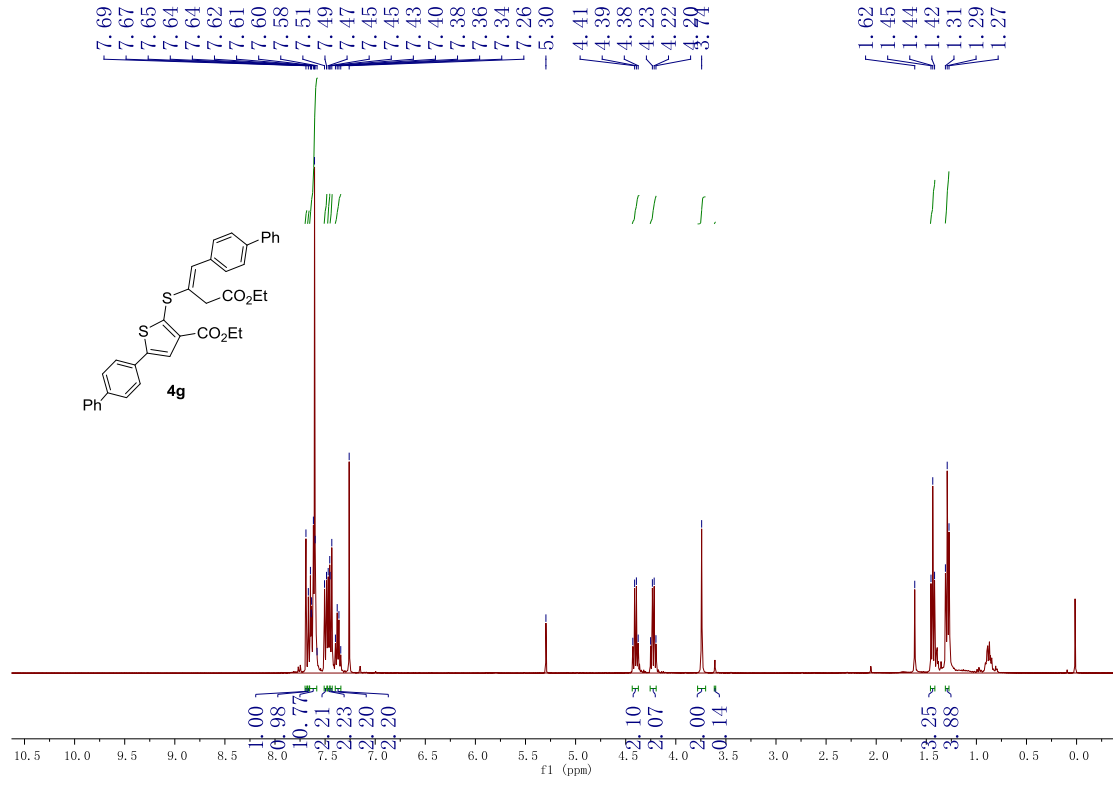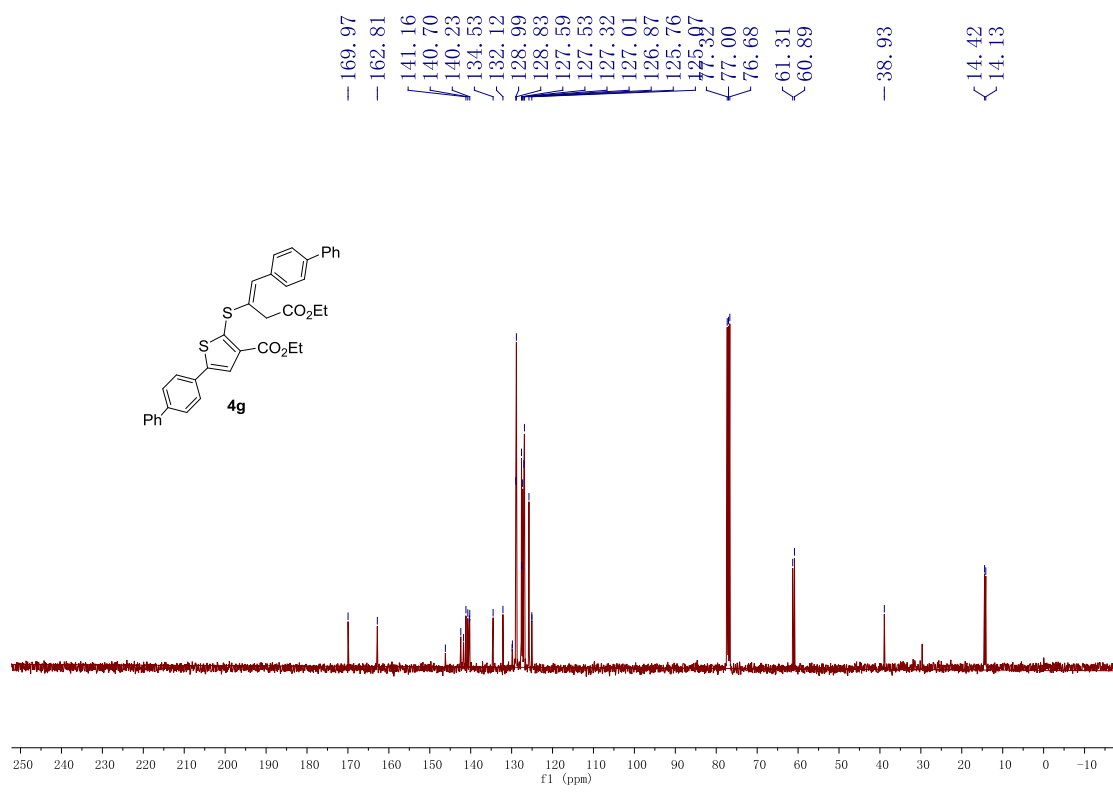

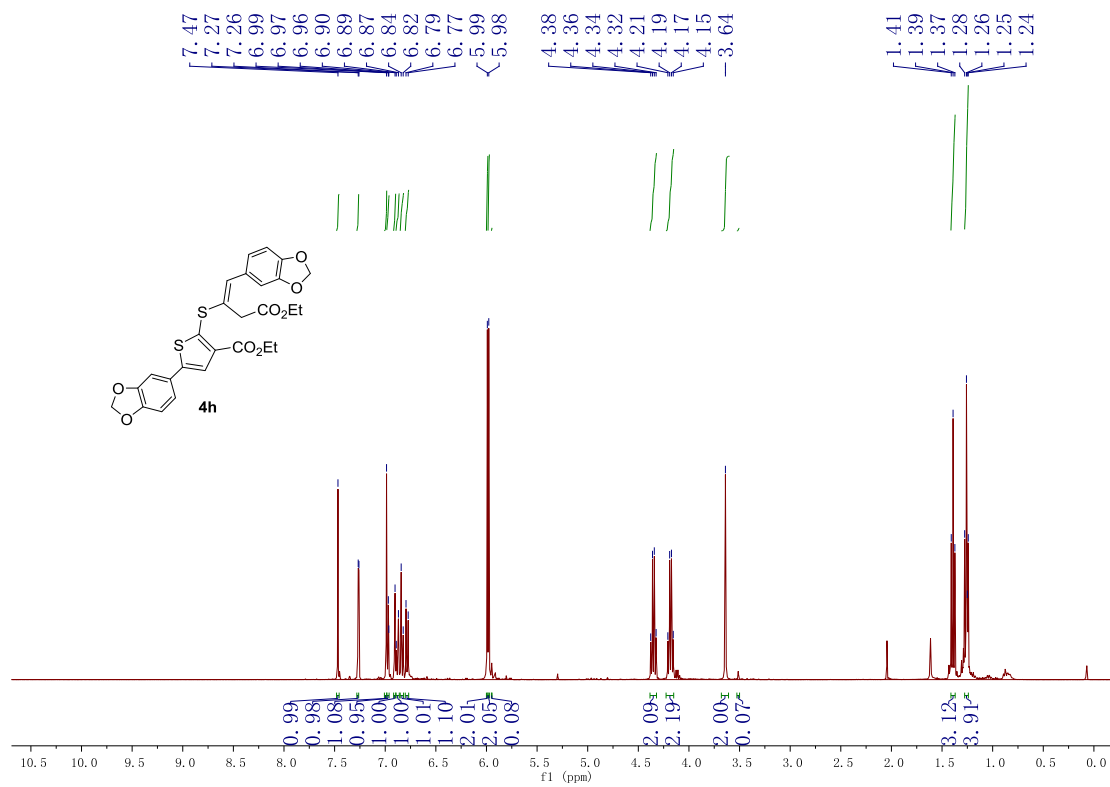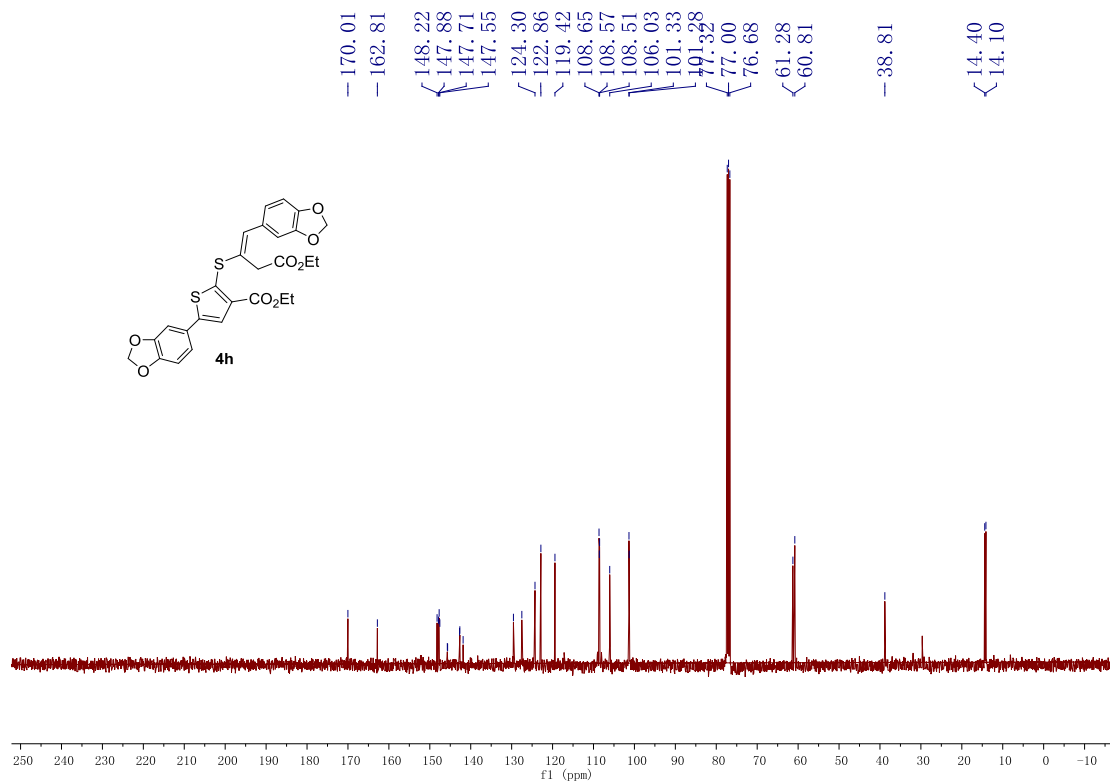

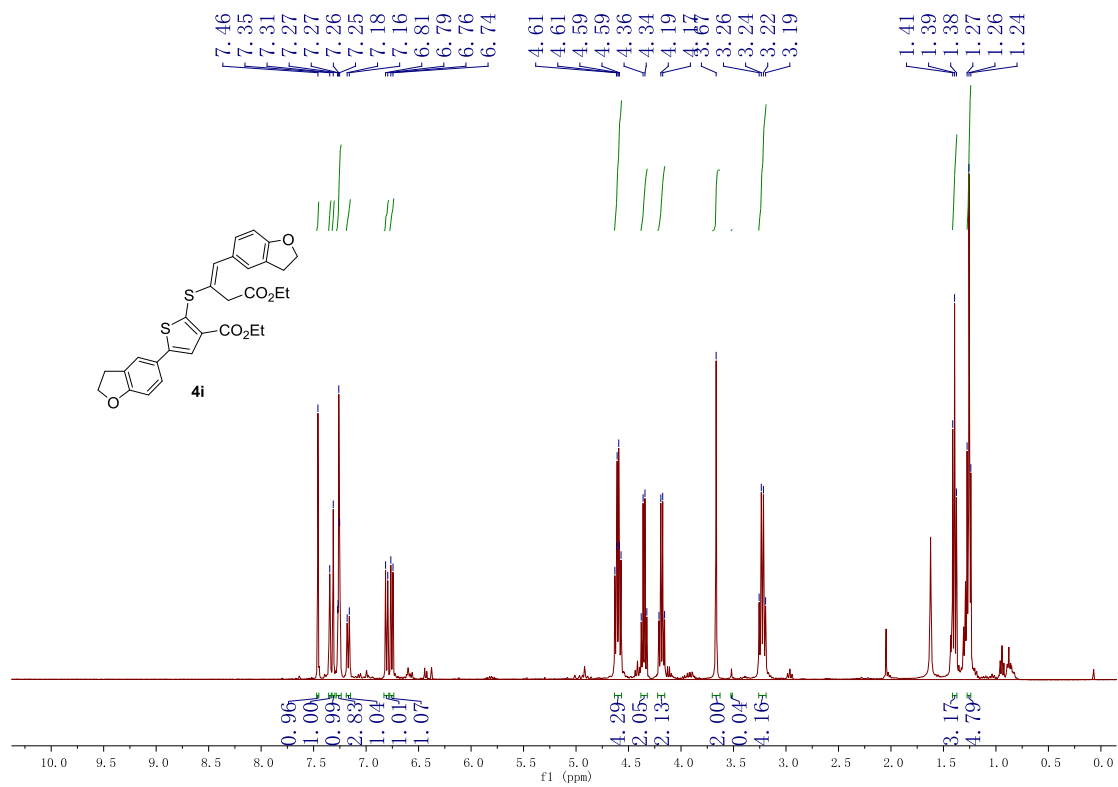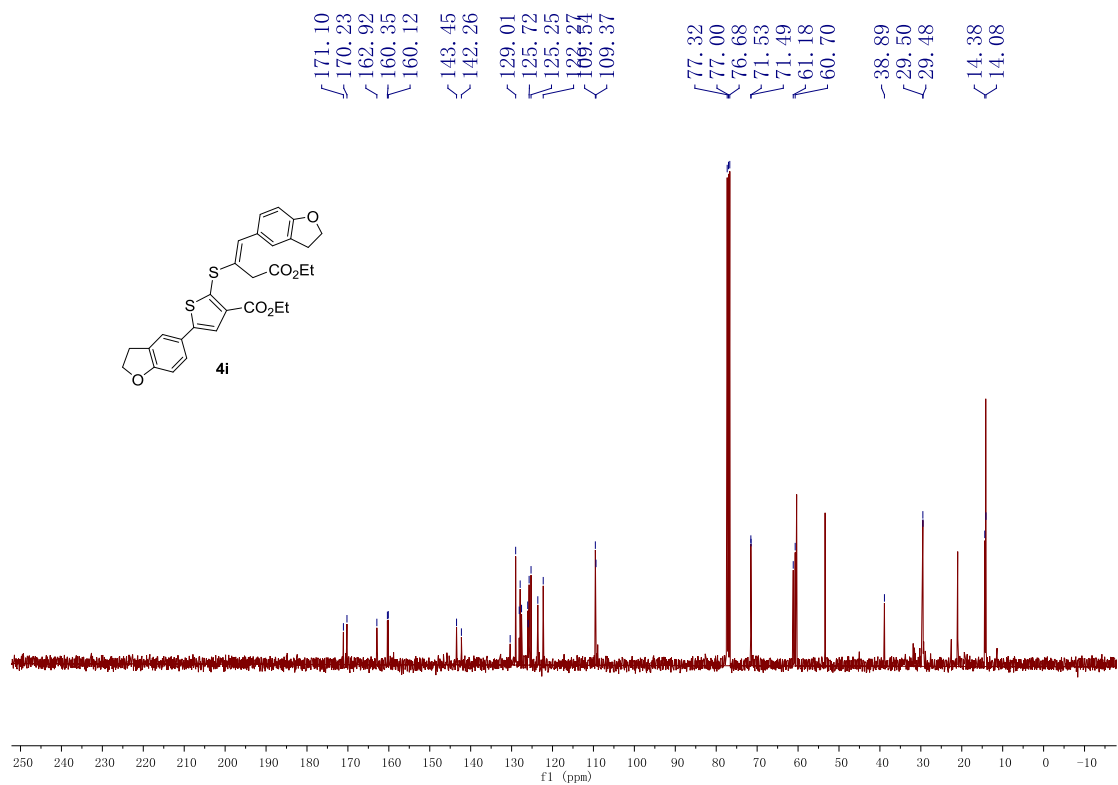

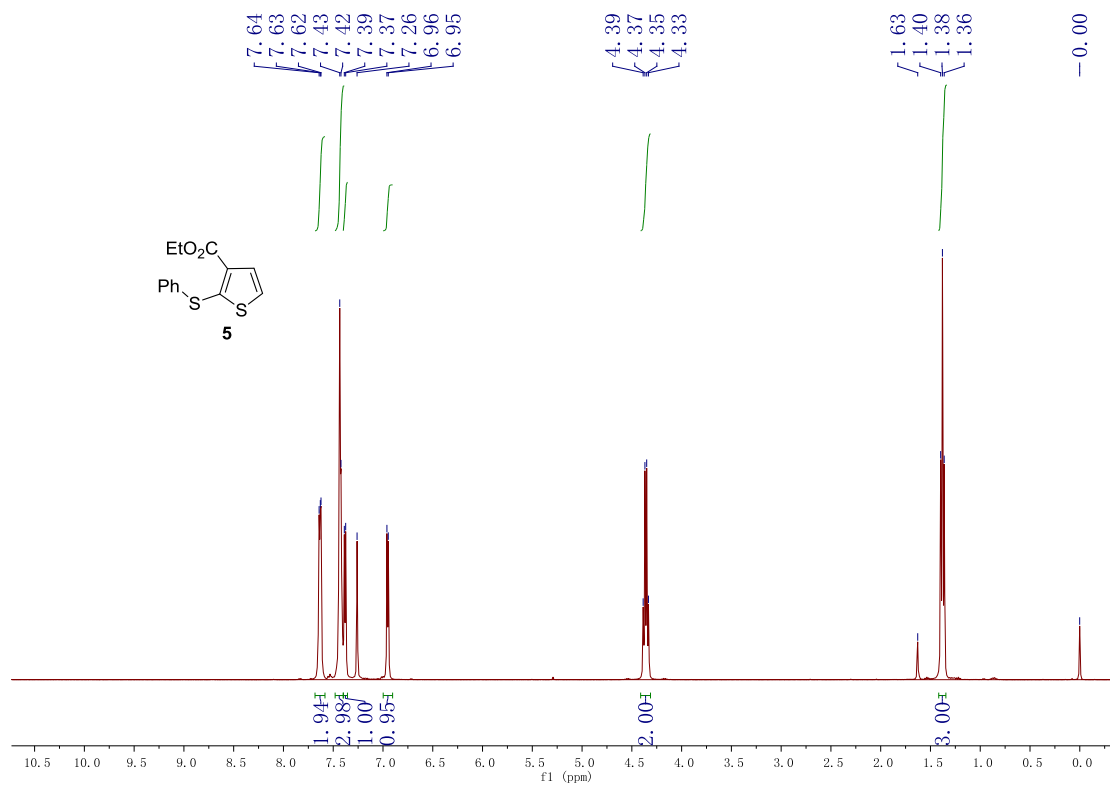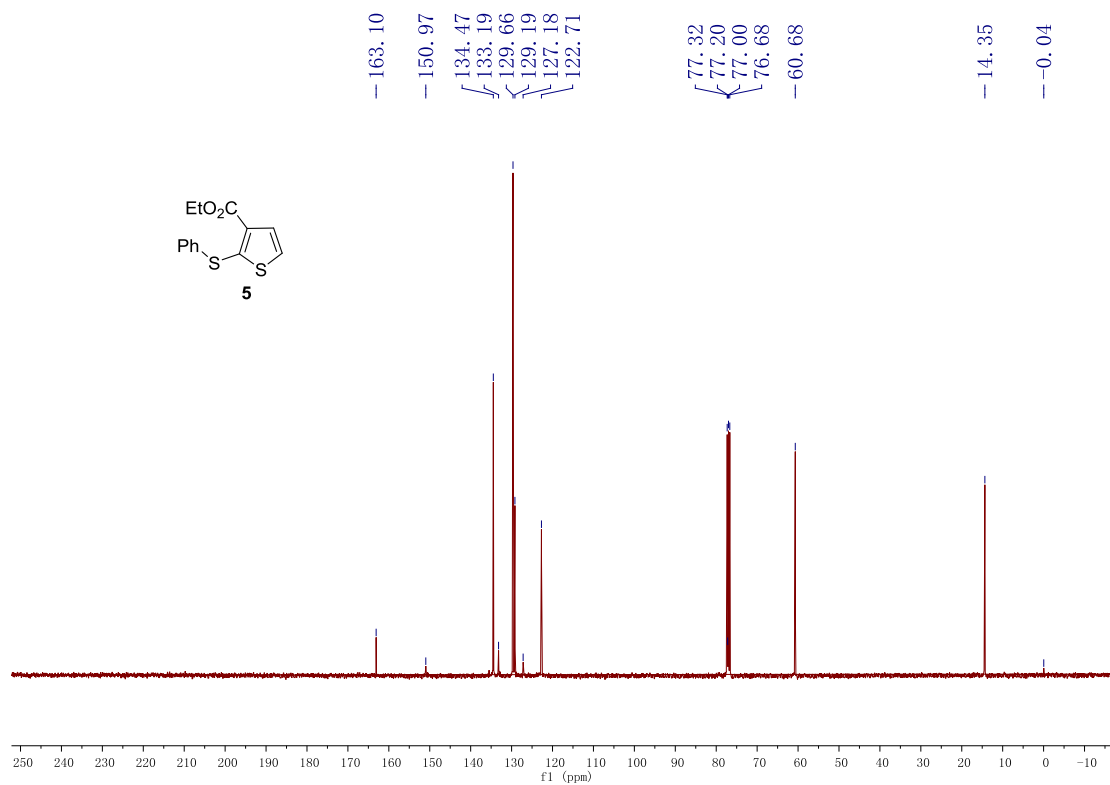

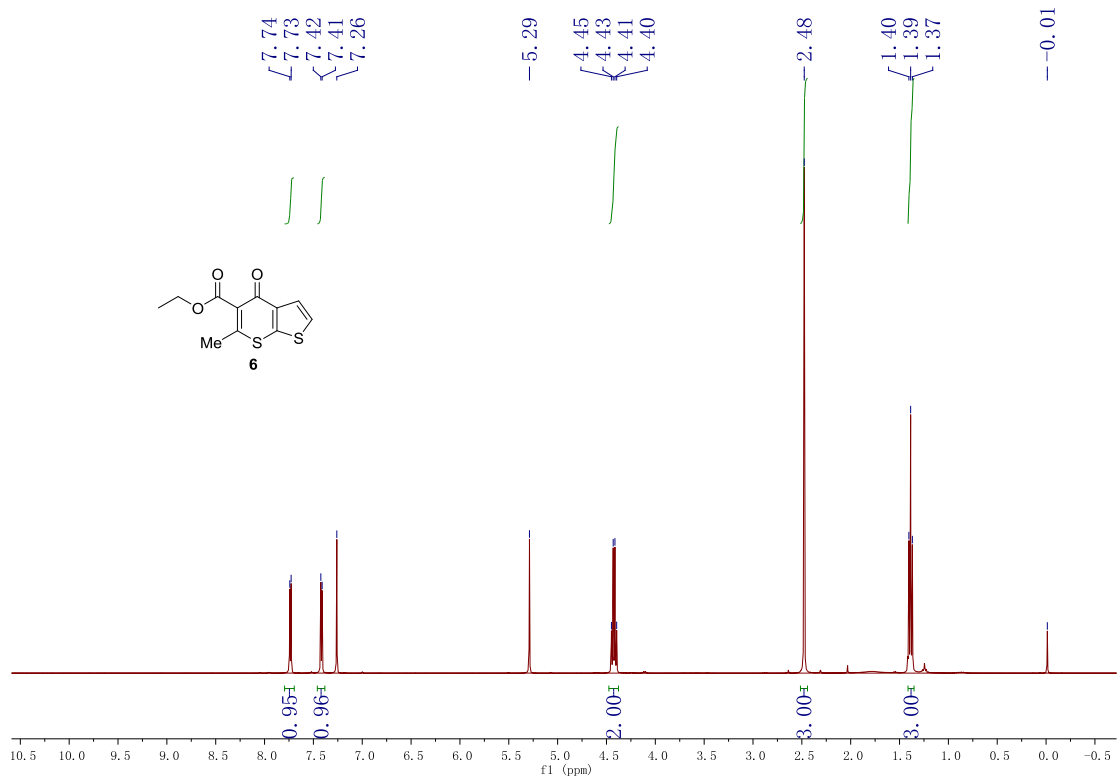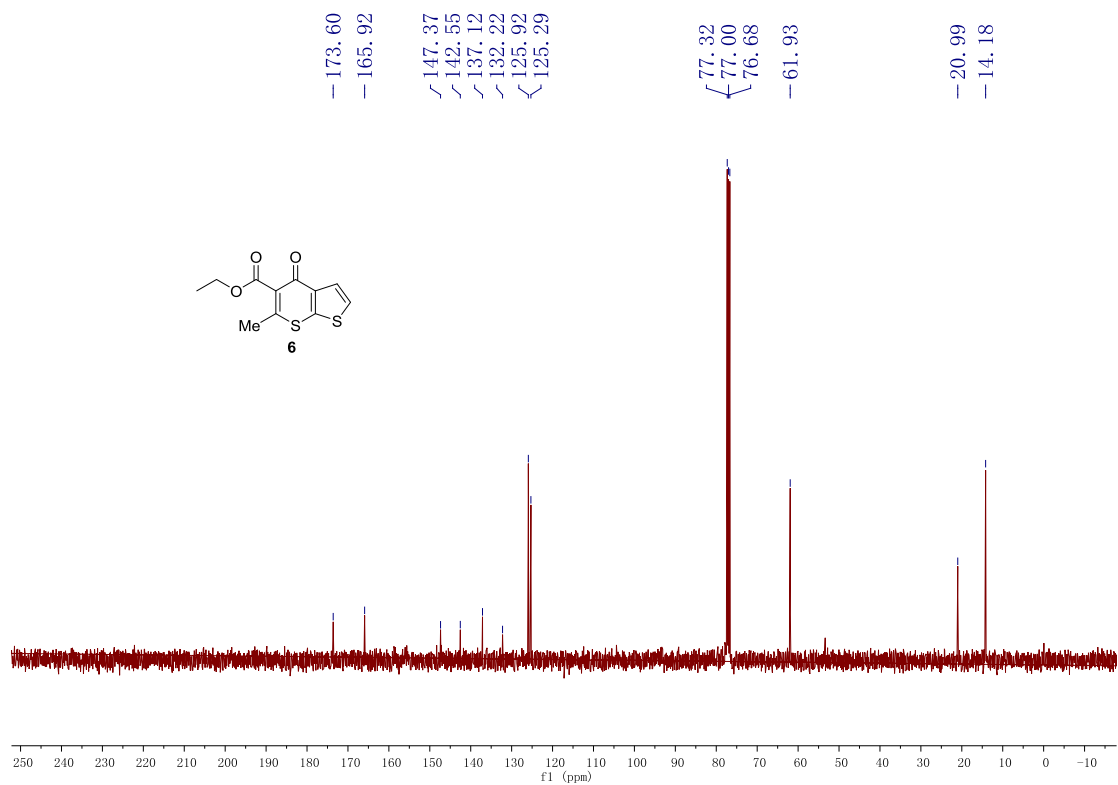



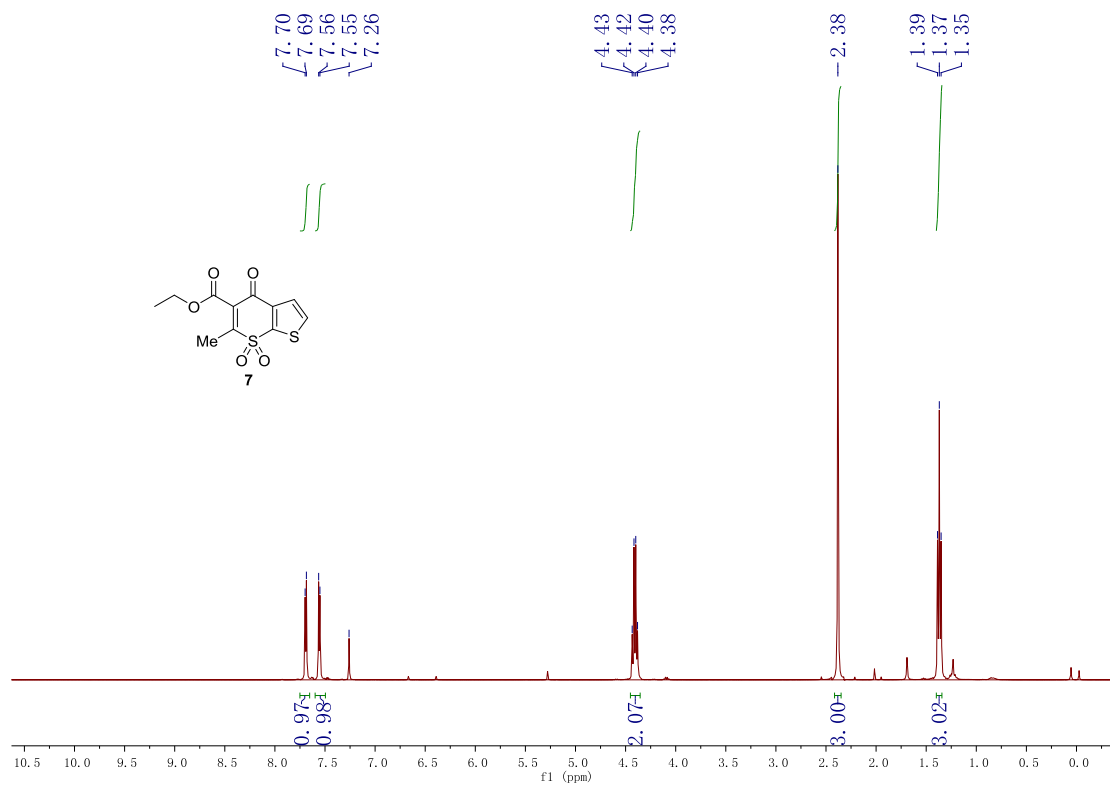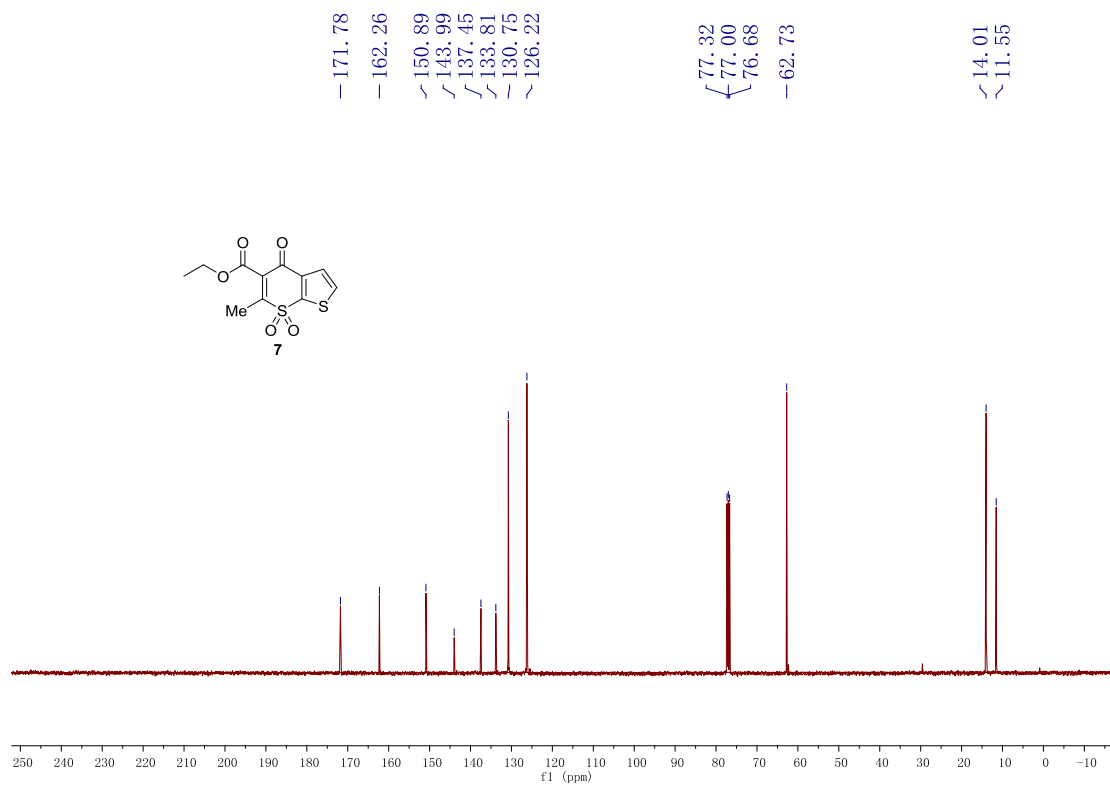

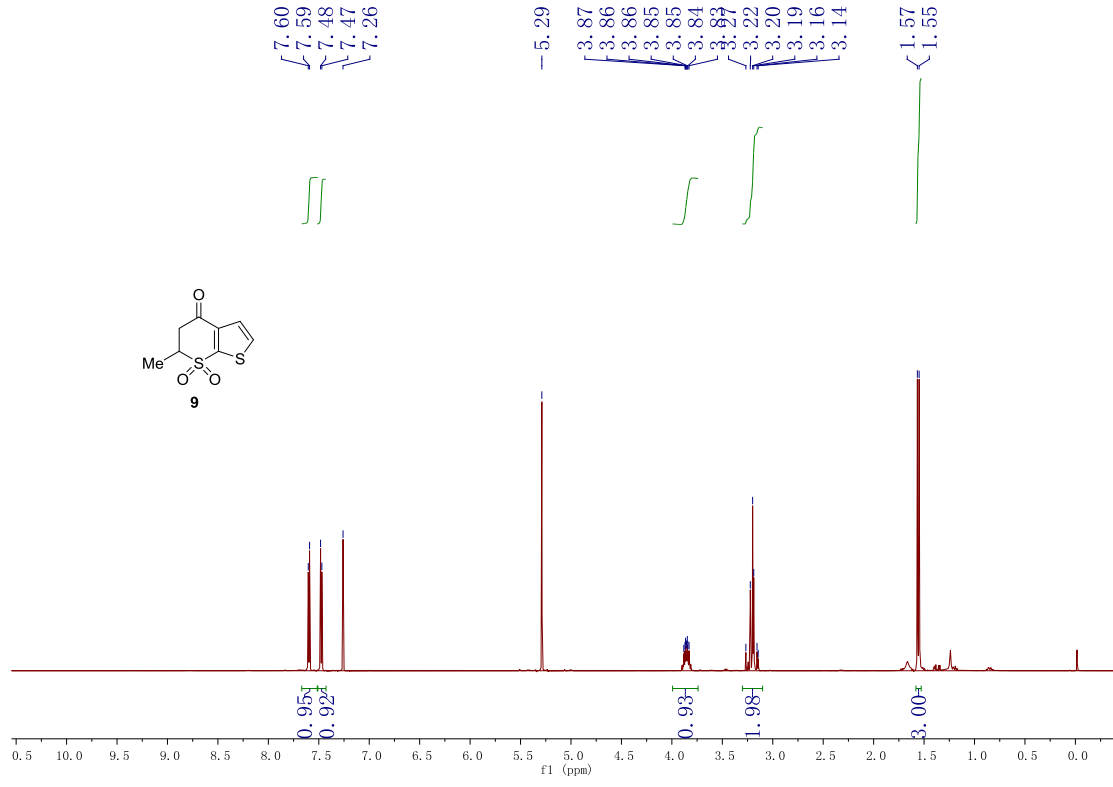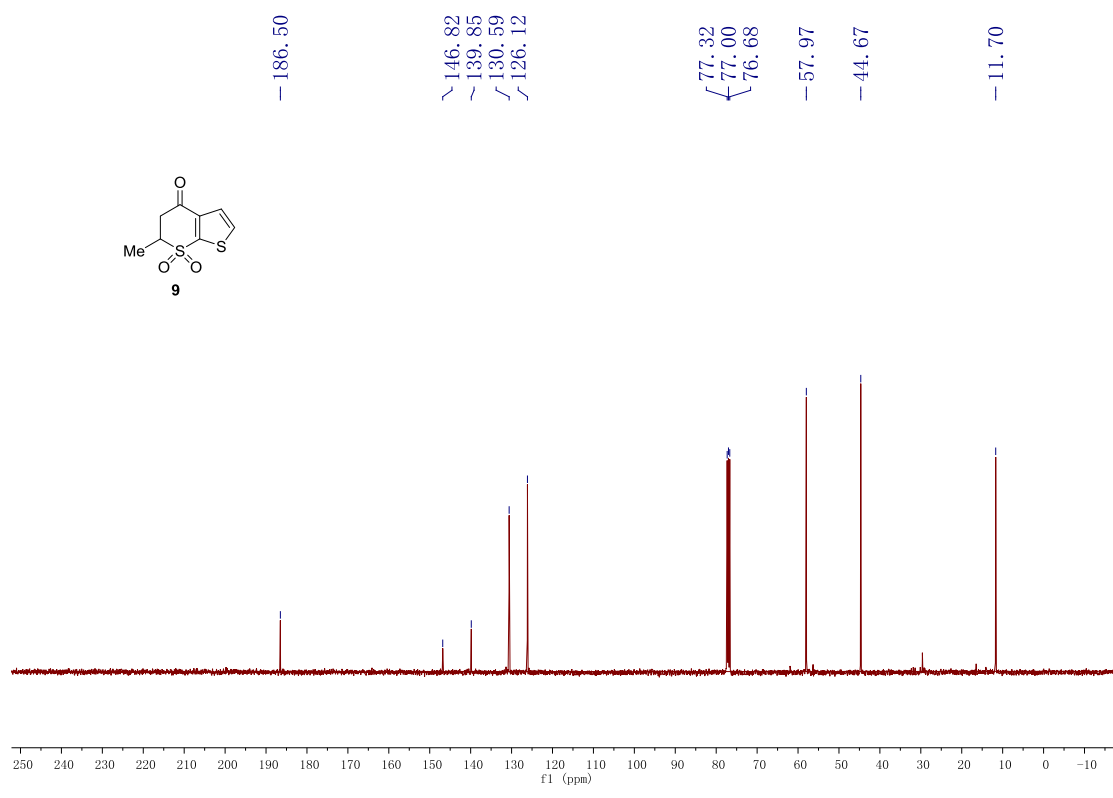

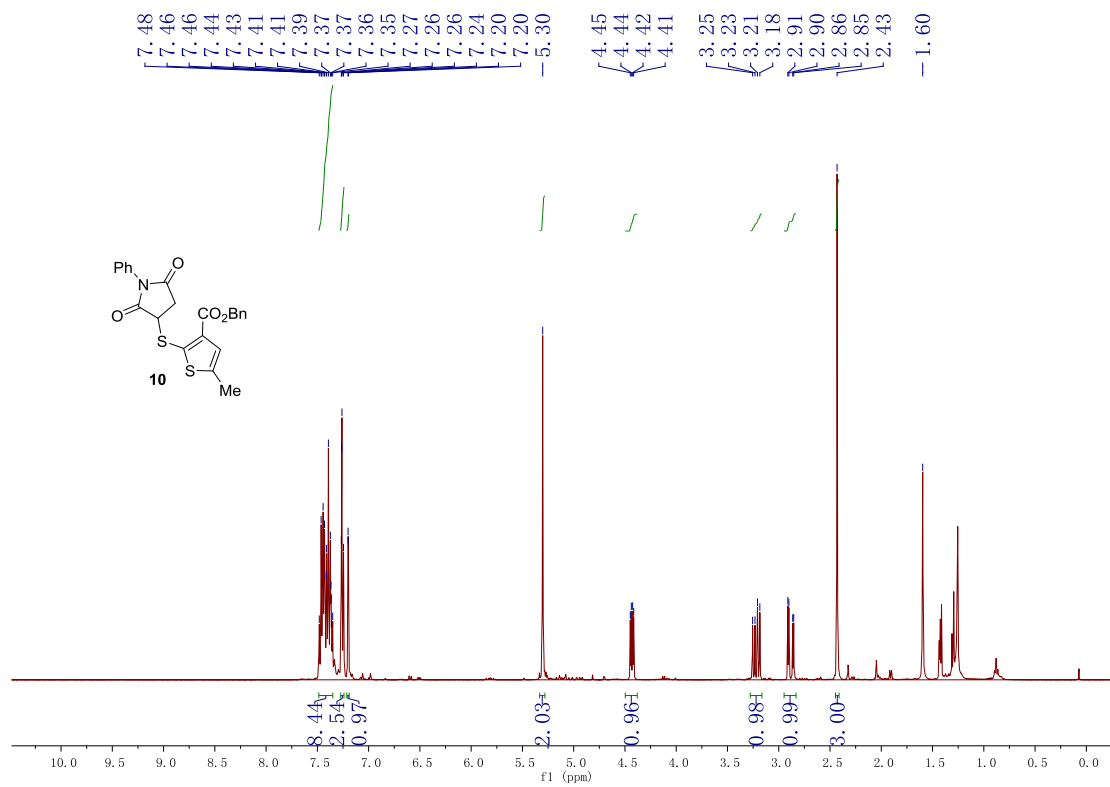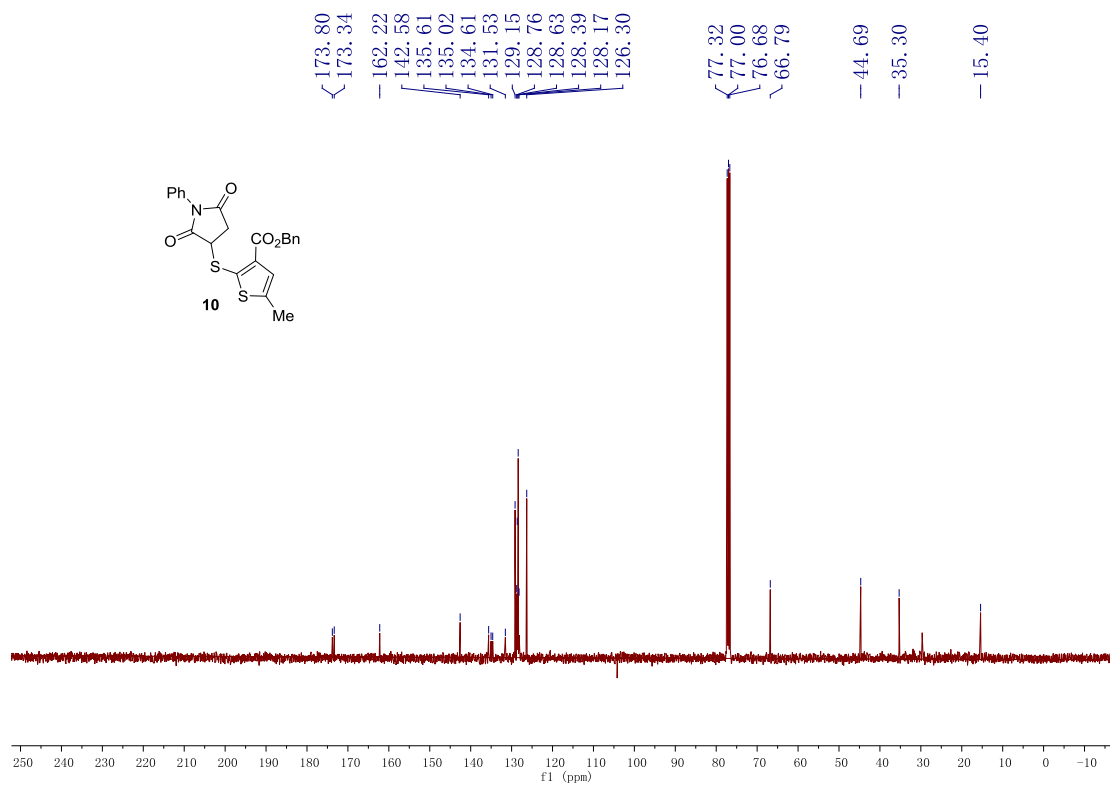

Supplement: d0cc05070a1.pdf [file d0cc05070a1.pdf]
